# Supplementary material for: Novel Isoniazid-Carborane Hybrids Active In Vitro against Mycobacterium tuberculosis
Source: MDPI journal article supplement (doi:10.3390/ph13120465), 2020-12-15
Supplement: s1 [file s1]

## Novel Isoniazid-Carborane Hybrids Active *in vitro* Against *Mycobacterium tuberculosis*

Daria Różycka<sup>1</sup>, Małgorzata Korycka-Machała<sup>1</sup>, Anna Żaczek<sup>2</sup>, Jarosław Dziadek<sup>1</sup>, Dorota Gurda<sup>3</sup>,  
Marta Orlicka-Płocka<sup>3</sup>, Eliza Wysoko<sup>3</sup>, Katarzyna Biniek-Antosiak<sup>3</sup>, Wojciech Rypniewski<sup>3</sup>, Agnieszka  
B. Olejniczak<sup>1,\*</sup>

<sup>1</sup> Institute of Medical Biology, Polish Academy of Sciences, 106 Lodowa St., 93-232 Lodz, Poland;  
drozycka@cbm.pan.pl (D.R.); mkorycka@cbm.pan.pl (M.K.M.); jdziadek@cbm.pan.pl (J.D.);  
aolejniczak@cbm.pan.pl (A.B.O.)

<sup>2</sup> Institute of Medical Sciences, Medical College, University of Rzeszow, 2A Kopisto Avenue, 35-959  
Rzeszow, Poland; ania.zaczek@yahoo.pl (A.Z.)

<sup>3</sup> Institute of Bioorganic Chemistry, Polish Academy of Sciences, 12/14 Z. Noskowskiego St., 61-704  
Poznan, Poland; d\_gurda@ibch.poznan.pl (D.G.); mplocka@ibch.poznan.pl (M.O.P.);  
wyszkoe@ibch.poznan.pl (E.W.), kbiniek@ibch.poznan.pl (K.B.A.); wojtekr@ibch.poznan.pl (W. R.)

\* Correspondence: aolejniczak@cbm.pan.pl (A. B. O.); Tel.: +48-42-272-36-37

## Table of contents

|                                                                       |    |
|-----------------------------------------------------------------------|----|
| <b>Figure S1.</b> <sup>1</sup> H NMR spectrum of compound 3           | 4  |
| <b>Figure S2.</b> <sup>13</sup> C NMR spectrum of compound 3          | 5  |
| <b>Figure S3.</b> <sup>11</sup> B NMR {H BB} spectrum of compound 3   | 6  |
| <b>Figure S4.</b> IR spectrum of compound 3                           | 7  |
| <b>Figure S5.</b> MS-APCI spectrum of compound 3                      | 8  |
| <b>Figure S6.</b> FT-IR spectrum of compound 8                        | 9  |
| <b>Figure S7.</b> <sup>13</sup> C NMR spectrum of compound 8          | 10 |
| <b>Figure S8.</b> <sup>11</sup> B NMR {H BB} spectrum of compound 8   | 11 |
| <b>Figure S9.</b> IR spectrum of compound 8                           | 12 |
| <b>Figure S10.</b> APCI-MS spectrum of compound 8                     | 13 |
| <b>Figure S11.</b> HPLC analysis of compound 8                        | 14 |
| <b>Figure S12.</b> <sup>1</sup> H NMR spectrum of compound 9          | 15 |
| <b>Figure S13.</b> <sup>13</sup> C NMR spectrum of compound 9         | 16 |
| <b>Figure S14.</b> <sup>11</sup> B NMR {H BB} spectrum of compound 9  | 17 |
| <b>Figure S15.</b> IR spectrum of compound 9                          | 18 |
| <b>Figure S16.</b> APCI-MS spectrum of compound 9                     | 19 |
| <b>Figure S17.</b> HPLC analysis of compound 9                        | 20 |
| <b>Figure S18.</b> <sup>1</sup> H NMR spectrum of compound 10         | 21 |
| <b>Figure S19.</b> <sup>13</sup> C NMR spectrum of compound 10        | 22 |
| <b>Figure S20.</b> <sup>11</sup> B NMR {H BB} spectrum of compound 10 | 23 |
| <b>Figure S21.</b> IR spectrum of compound 10                         | 24 |
| <b>Figure S22.</b> APCI-MS spectrum of compound 10                    | 25 |
| <b>Figure S23.</b> HPLC analysis of compound 10                       | 26 |
| <b>Figure S24.</b> <sup>1</sup> H NMR spectrum of compound 14         | 27 |
| <b>Figure S25.</b> <sup>13</sup> C NMR spectrum of compound 14        | 28 |
| <b>Figure S26.</b> <sup>11</sup> B NMR {H BB} spectrum of compound 14 | 29 |
| <b>Figure S27.</b> IR spectrum of compound 14                         | 30 |
| <b>Figure S28.</b> MS spectrum of compound 14                         | 31 |
| <b>Figure S29.</b> HPLC analysis of compound 14                       | 32 |
| <b>Figure S30.</b> <sup>1</sup> H NMR spectrum of compound 15         | 33 |
| <b>Figure S31.</b> <sup>13</sup> C NMR spectrum of compound 15        | 34 |
| <b>Figure S32.</b> <sup>11</sup> B NMR {H BB} spectrum of compound 15 | 35 |
| <b>Figure S33.</b> IR spectrum of compound 15                         | 36 |
| <b>Figure S34.</b> MS spectrum of compound 15                         | 37 |
| <b>Figure S35.</b> HPLC analysis of compound 15                       | 38 |
| <b>Figure S36.</b> <sup>1</sup> H NMR spectrum of compound 16         | 39 |
| <b>Figure S37.</b> <sup>13</sup> C NMR spectrum of compound 16        | 40 |
| <b>Figure S38.</b> <sup>11</sup> B NMR {H BB} spectrum of compound 16 | 41 |
| <b>Figure S39.</b> IR spectrum of compound 16                         | 42 |
| <b>Figure S40.</b> MS spectrum of compound 16                         | 43 |
| <b>Figure S41.</b> HPLC analysis of compound 16                       | 44 |
| <b>Figure S42.</b> <sup>1</sup> H NMR spectrum of compound 20         | 45 |
| <b>Figure S43.</b> <sup>13</sup> C NMR spectrum of compound 20        | 46 |
| <b>Figure S44.</b> <sup>11</sup> B NMR {H BB} spectrum of compound 20 | 47 |
| <b>Figure S45.</b> IR spectrum of compound 20                         | 48 |
| <b>Figure S46.</b> MS spectrum of compound 20                         | 49 |
| <b>Figure S47.</b> HPLC analysis of compound 20                       | 50 |
| <b>Figure S48.</b> <sup>1</sup> H NMR spectrum of compound 21         | 51 |
| <b>Figure S49.</b> <sup>13</sup> C NMR spectrum of compound 21        | 52 |

|                                                                                                     |    |
|-----------------------------------------------------------------------------------------------------|----|
| <b>Figure S50.</b> $^{11}\text{B}$ NMR $\{^1\text{H BB}\}$ spectrum of compound <b>21</b>           | 53 |
| <b>Figure S51.</b> IR spectrum of compound <b>21</b>                                                | 54 |
| <b>Figure S52.</b> MS spectrum of compound <b>21</b>                                                | 55 |
| <b>Figure S53.</b> HPLC analysis of compound <b>21</b>                                              | 56 |
| <b>Figure S54.</b> $^1\text{H}$ NMR spectrum of compound <b>22</b>                                  | 57 |
| <b>Figure S55.</b> $^{13}\text{C}$ NMR spectrum of compound <b>22</b>                               | 58 |
| <b>Figure S56.</b> $^{11}\text{B}$ NMR $\{^1\text{H BB}\}$ spectrum of compound <b>22</b>           | 59 |
| <b>Figure S57.</b> IR spectrum of compound <b>22</b>                                                | 60 |
| <b>Figure S58.</b> MS spectrum of compound <b>22</b>                                                | 61 |
| <b>Figure S59.</b> HPLC analysis of compound <b>22</b>                                              | 62 |
| <b>Figure S60.</b> $^1\text{H}$ NMR spectrum of compound <b>23</b>                                  | 63 |
| <b>Figure S61.</b> $^{13}\text{C}$ NMR spectrum of compound <b>23</b>                               | 64 |
| <b>Figure S62.</b> $^{11}\text{B}$ NMR $\{^1\text{H BB}\}$ spectrum of compound <b>23</b>           | 65 |
| <b>Figure S63.</b> IR spectrum of compound <b>23</b>                                                | 66 |
| <b>Figure S64.</b> MS spectrum of compound <b>23</b>                                                | 67 |
| <b>Figure S65.</b> HPLC analysis of compound <b>23</b>                                              | 68 |
| <b>Figure S66.</b> $^1\text{H}$ NMR spectrum of compound <b>24</b>                                  | 69 |
| <b>Figure S67.</b> $^{13}\text{C}$ NMR spectrum of compound <b>24</b>                               | 70 |
| <b>Figure S68.</b> $^{11}\text{B}$ NMR $\{^1\text{H BB}\}$ spectrum of compound <b>24</b>           | 71 |
| <b>Figure S69.</b> IR spectrum of compound <b>24</b>                                                | 72 |
| <b>Figure S70.</b> MS spectrum of compound <b>24</b>                                                | 73 |
| <b>Figure S71.</b> HPLC analysis of compound <b>24</b>                                              | 74 |
| <b>Figure S72.</b> $^1\text{H}$ NMR spectrum of compound <b>25</b>                                  | 75 |
| <b>Figure S73.</b> $^{13}\text{C}$ NMR spectrum of compound <b>25</b>                               | 76 |
| <b>Figure S74.</b> $^{11}\text{B}$ NMR $\{^1\text{H BB}\}$ spectrum of compound <b>25</b>           | 77 |
| <b>Figure S75.</b> IR spectrum of compound <b>25</b>                                                | 78 |
| <b>Figure S76.</b> MS spectrum of compound <b>25</b>                                                | 79 |
| <b>Figure S77.</b> HPLC analysis of compound <b>25</b>                                              | 80 |
| <b>Table 1S.</b> Crystallographic data                                                              | 81 |
| <b>General procedure for competitive trapping</b>                                                   | 82 |
| <b>Figure S78.</b> The resulting trapped product <i>O</i> -isonicotinoylhydroxylamine ( <b>26</b> ) | 83 |
| <b>Figure S79.</b> MS spectrum of reaction of INH with TEMPO, and manganese catalyst                | 84 |
| <b>Figure S80.</b> MS spectrum of reaction of <b>8</b> with TEMPO, and manganese catalyst           | 85 |
| <b>Figure S81.</b> MS spectrum of reaction of <b>21</b> with TEMPO, and manganese catalyst          | 86 |
| <b>Figure S82.</b> MS spectrum of reaction of <b>25</b> with TEMPO, and manganese catalyst          | 87 |
| <b>Figure S83.</b> Confirmation of mutant construction by Southern Blotting analysis.               | 88 |

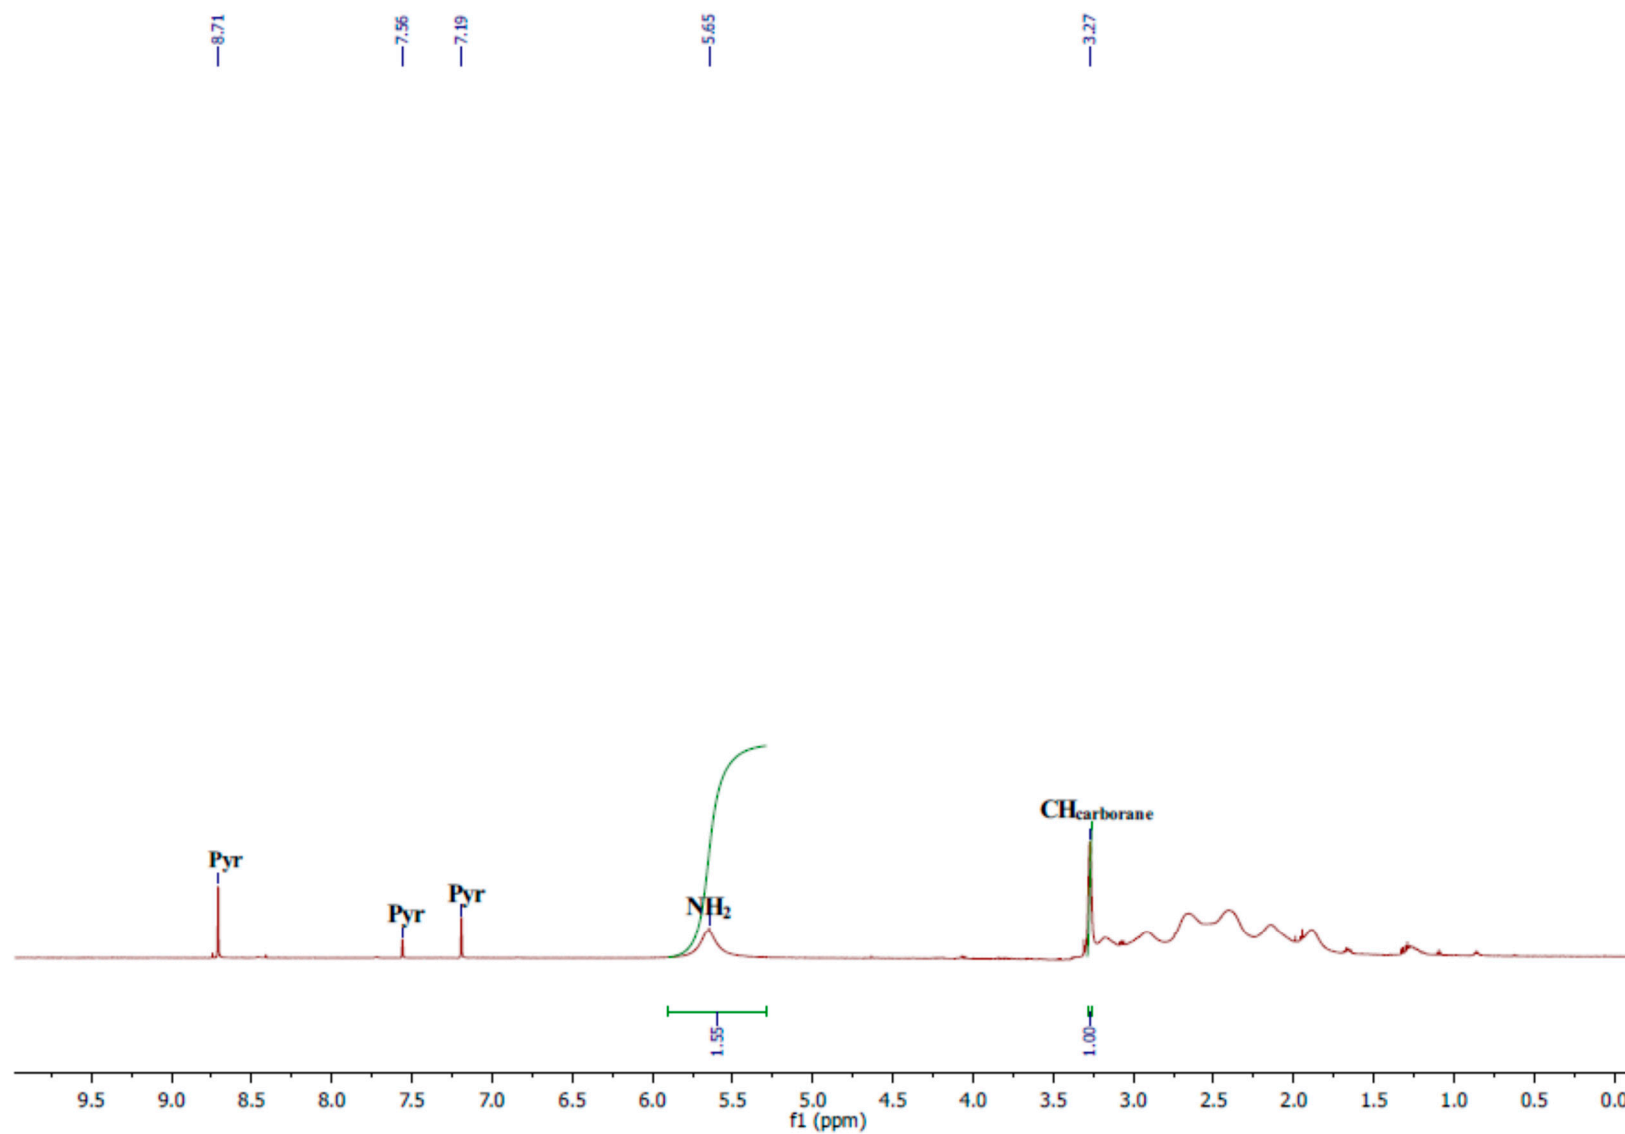

Figure S1. <sup>1</sup>H NMR spectrum of compound 3.

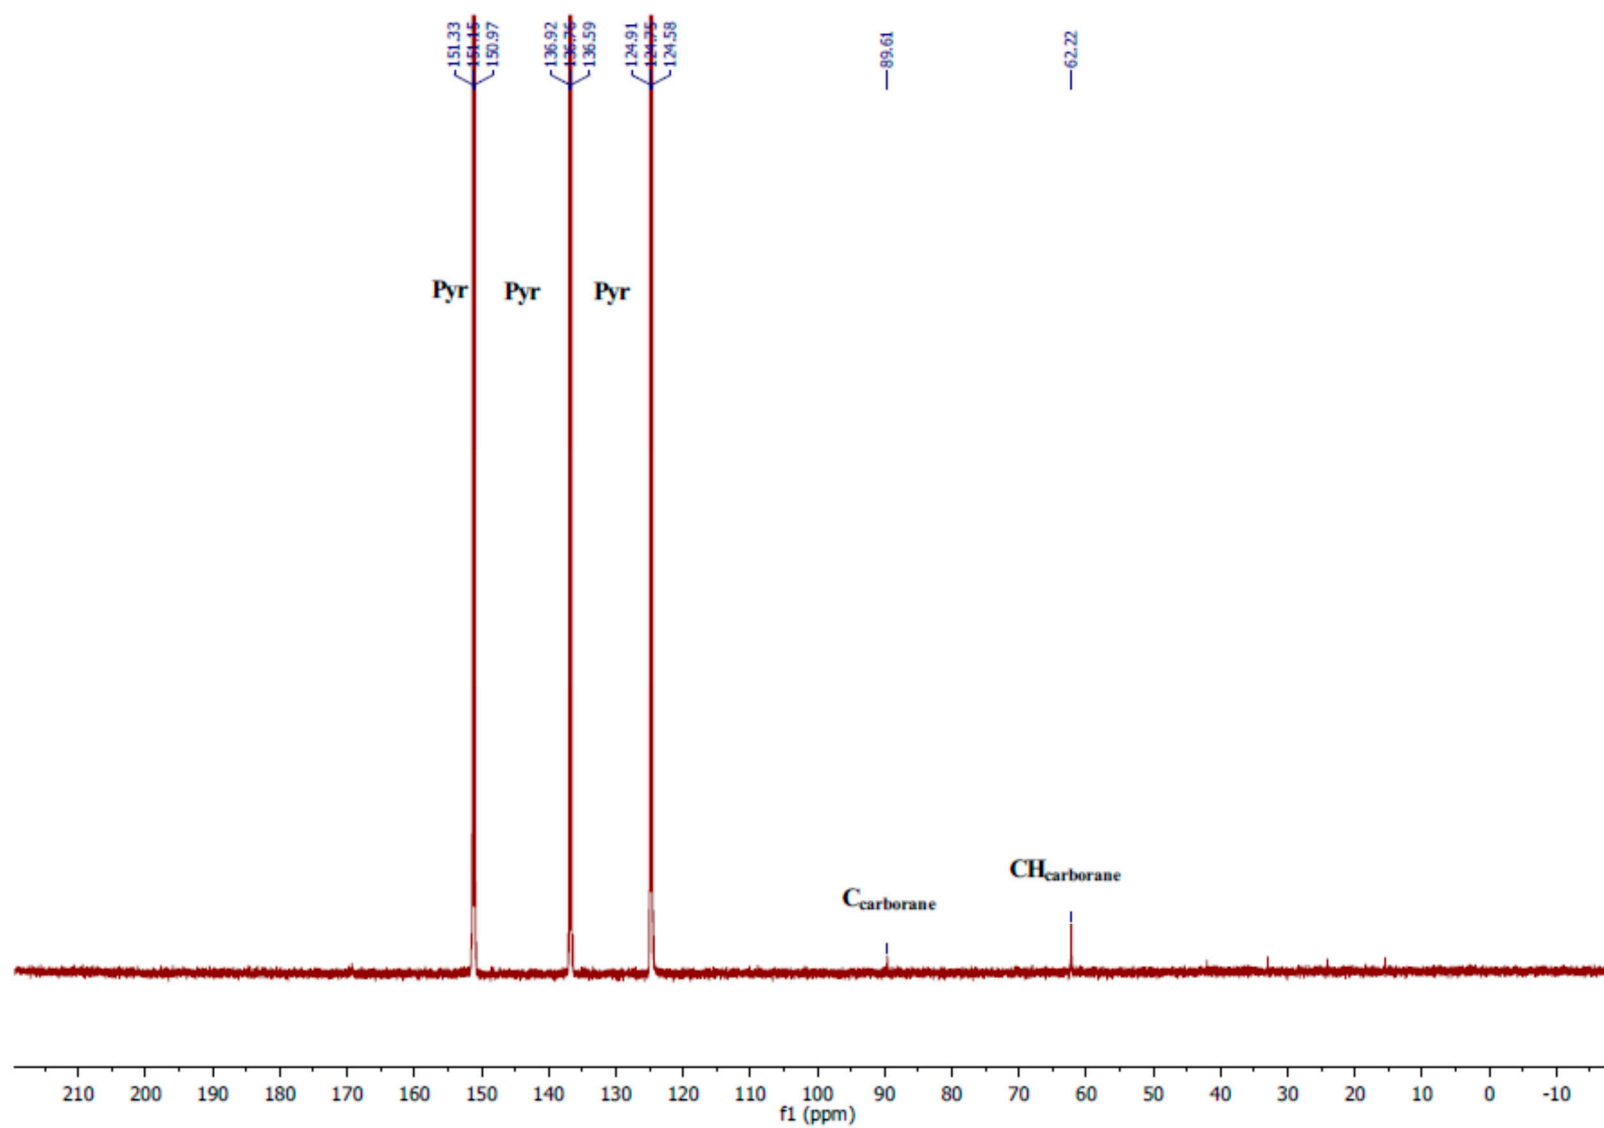

Figure S2.  $^{13}\text{C}$  NMR spectrum of compound 3.

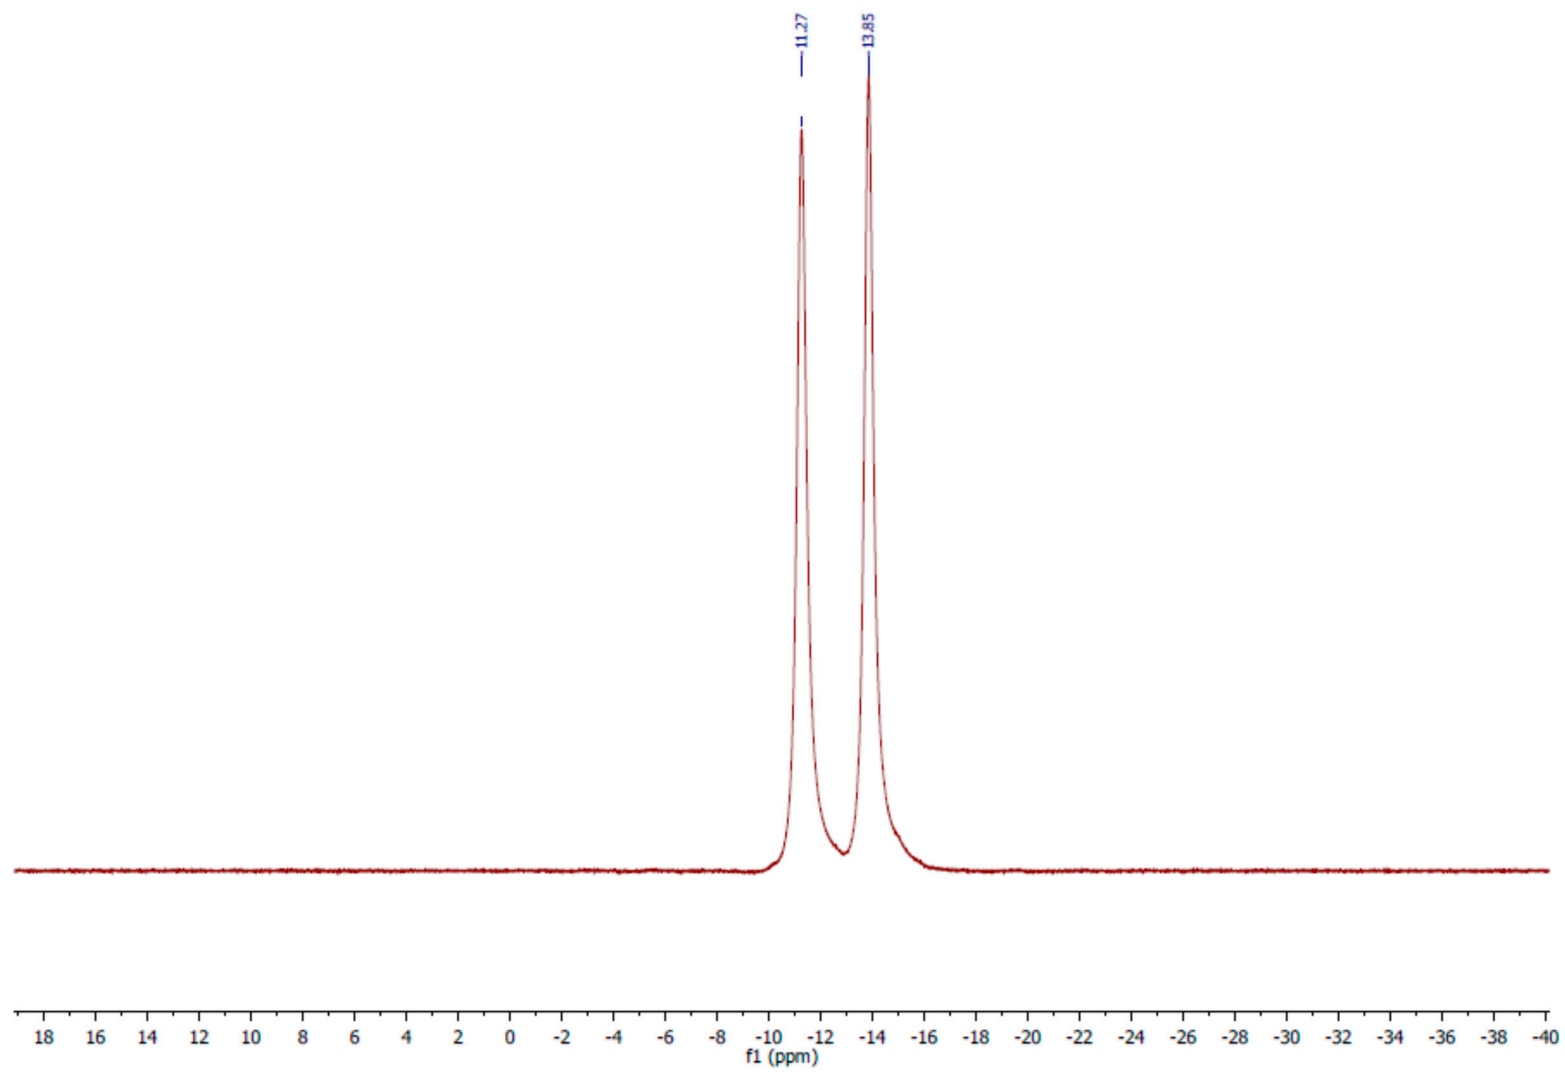

**Figure S3.**  $^{11}\text{B}$  NMR {H BB} spectrum of compound 3.

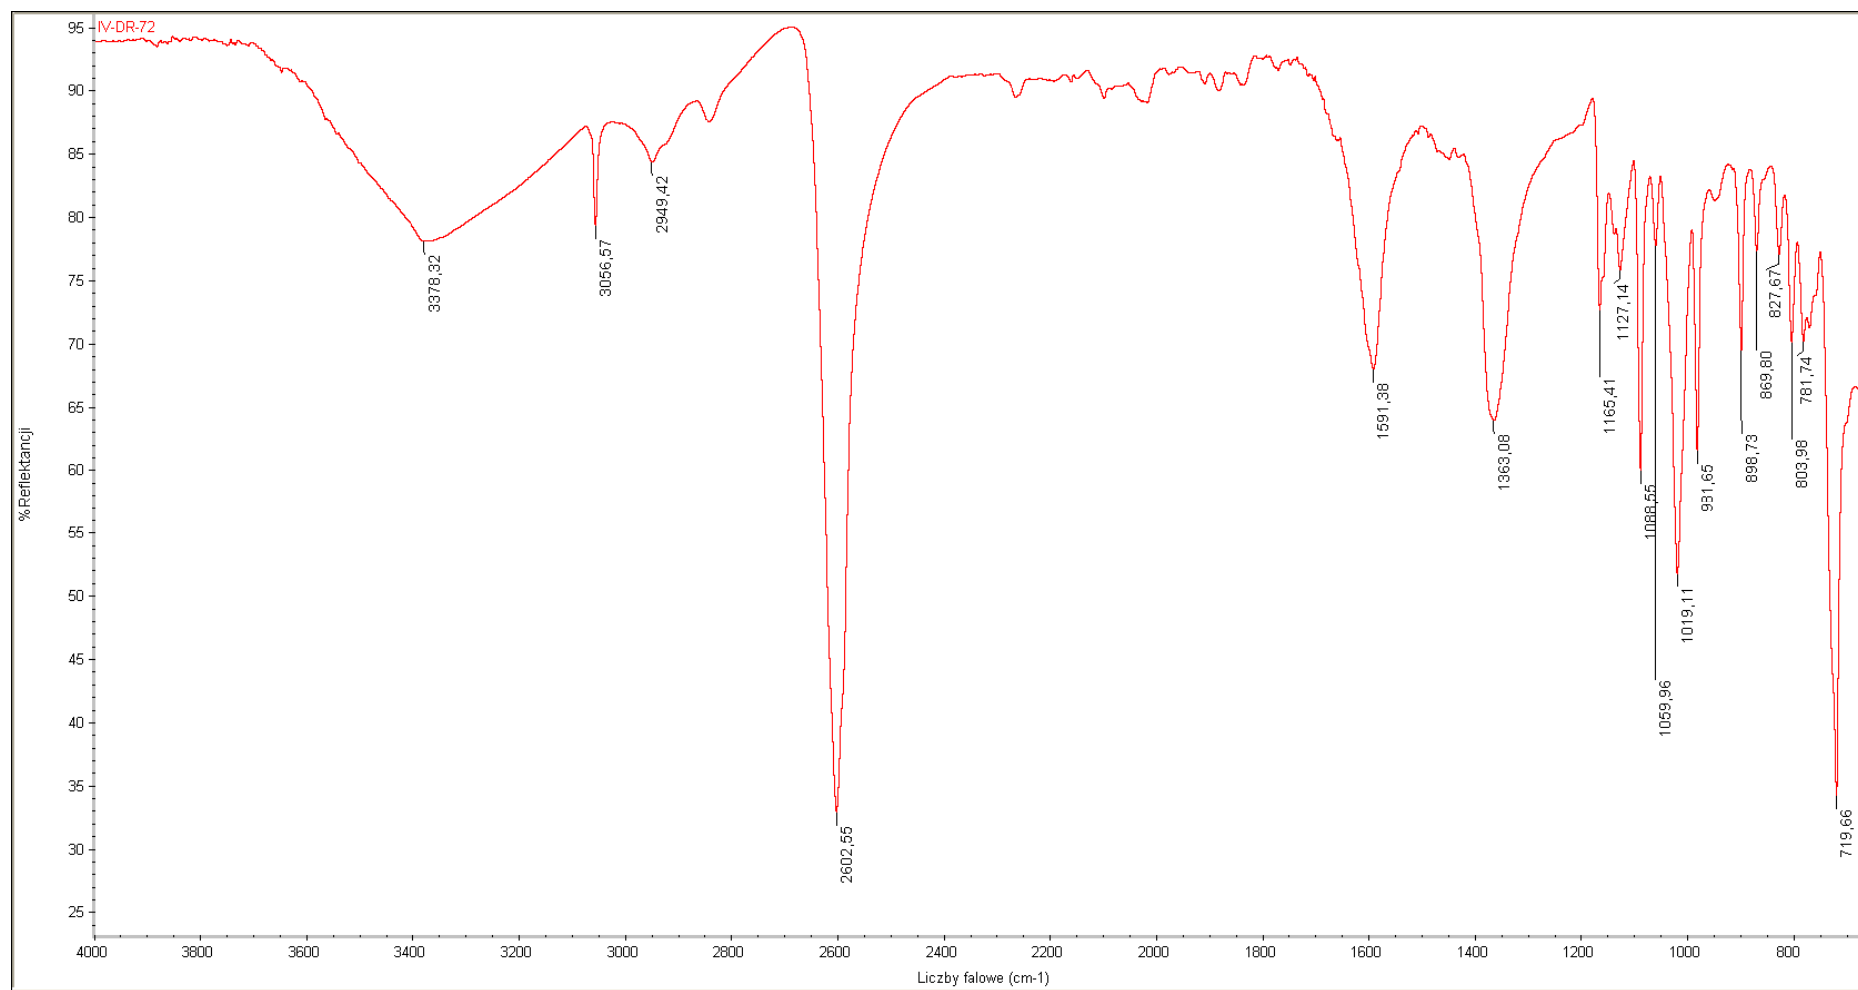

**Figure S4.** IR spectrum of compound 3.

Spectrum Name: iv-dr-56-t3\_g  
Start Ion: 100  
End Ion: 250  
Source: APCI + 10.0 $\mu$ A 400C  
Capillary: 150V 300C Offset: 25V Span: 0V

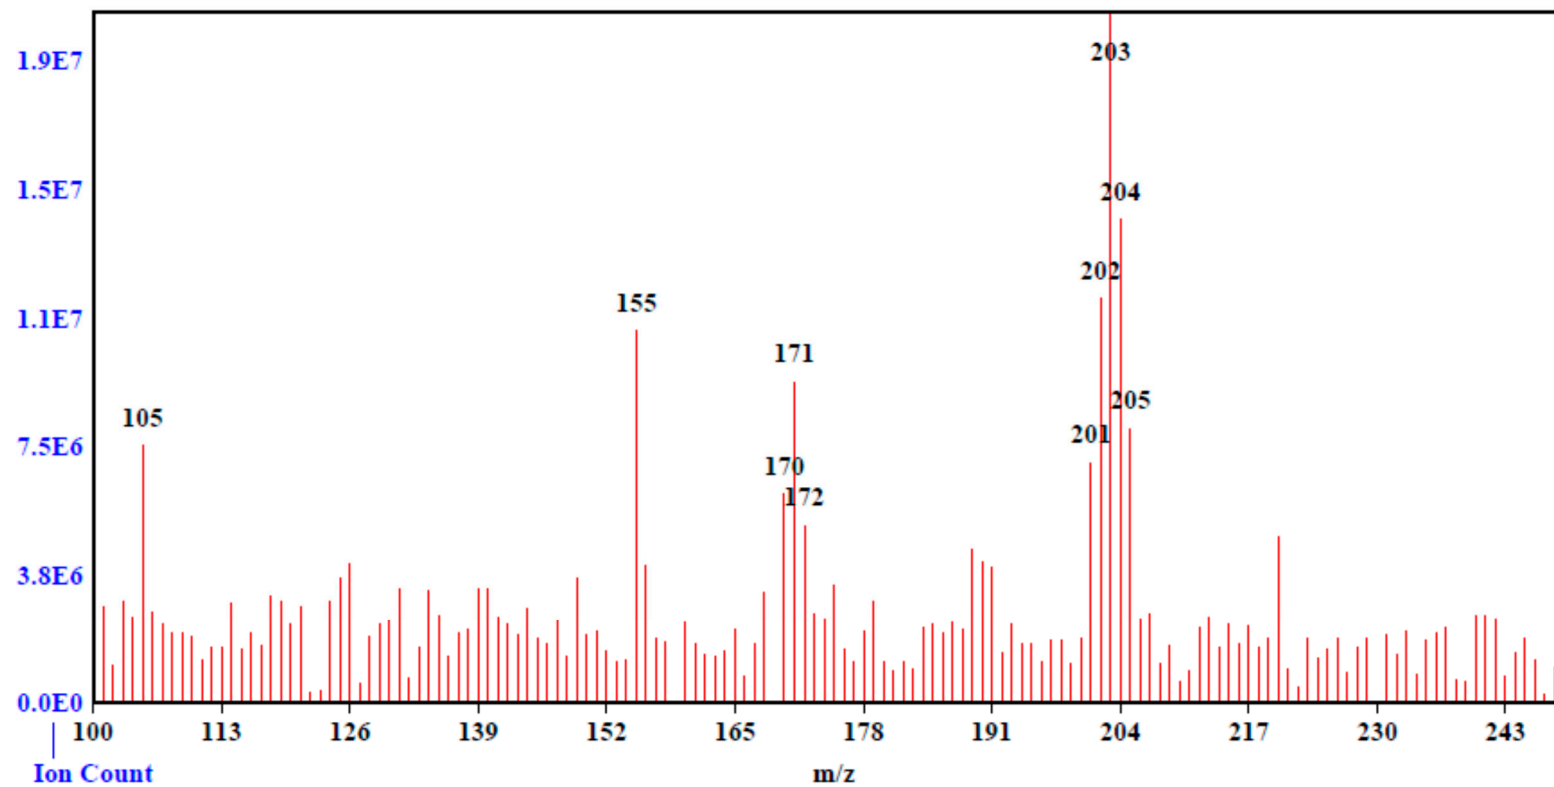

Figure S5. APCI-MS spectrum of compound 3.



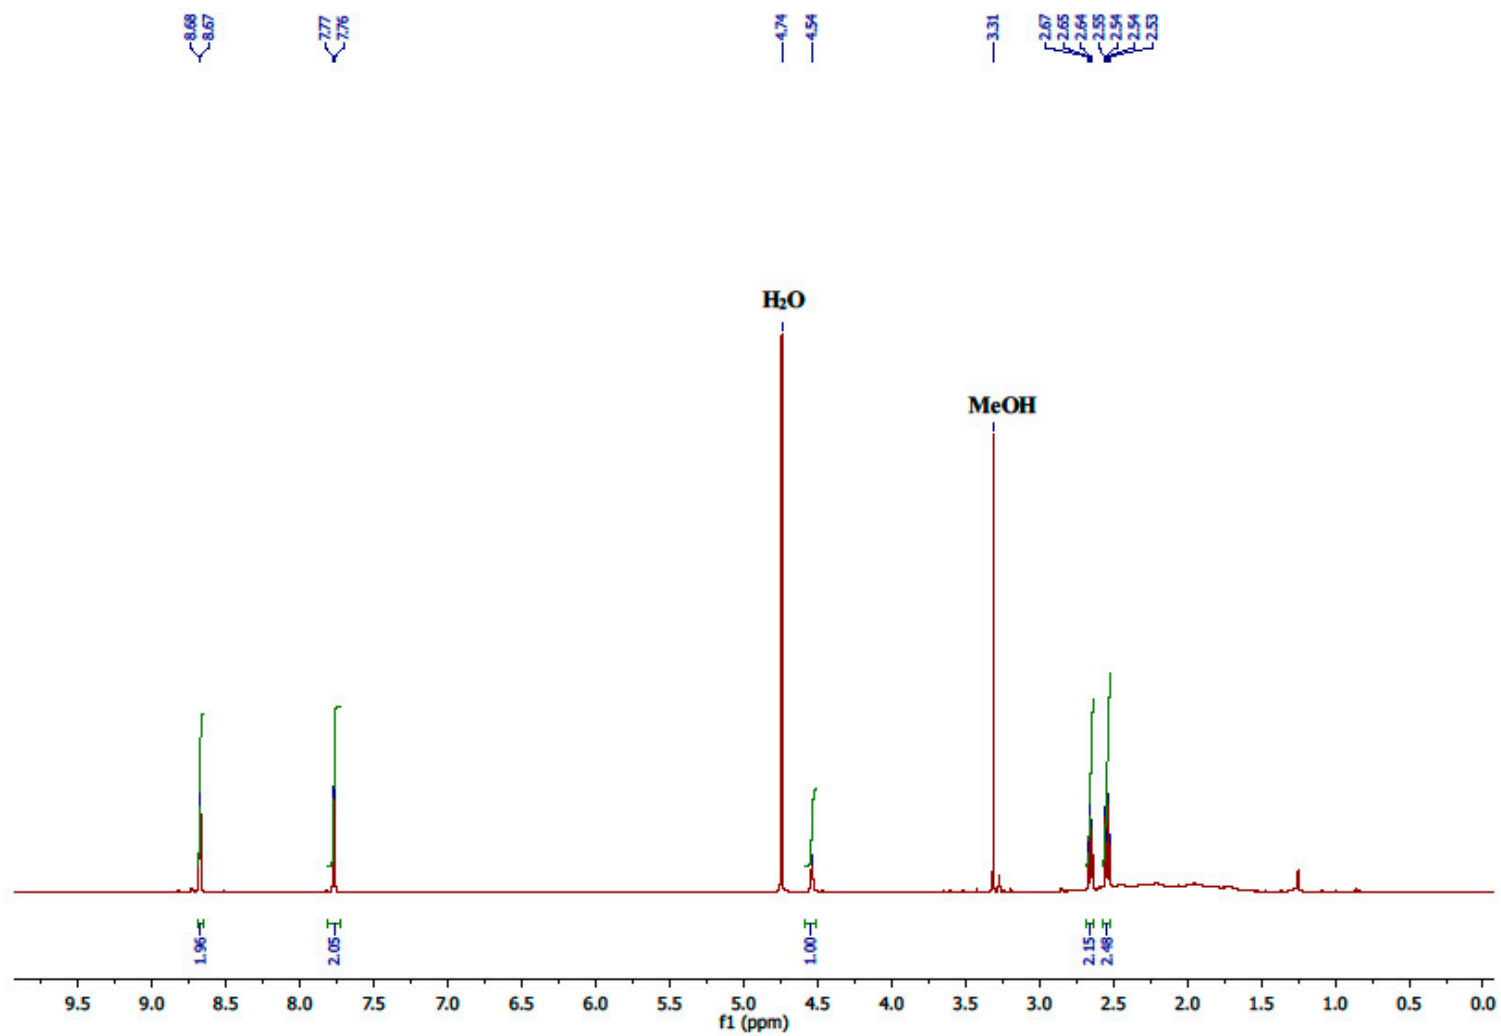

Figure S6. <sup>1</sup>H NMR spectrum of compound 8.

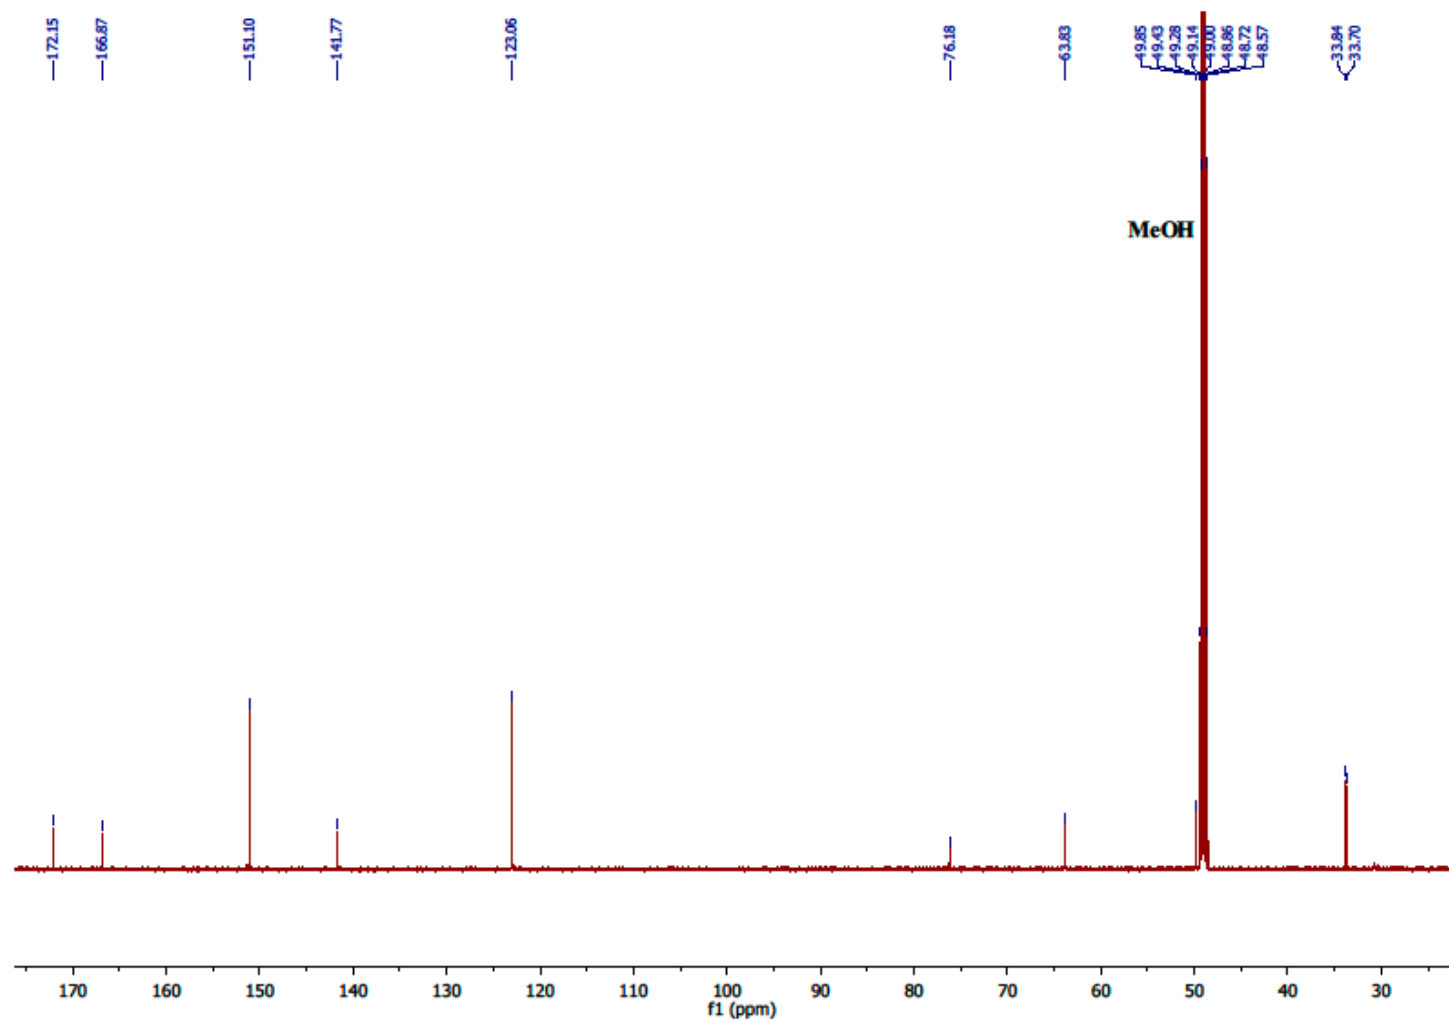

Figure S7. <sup>13</sup>C NMR spectrum of compound 8.

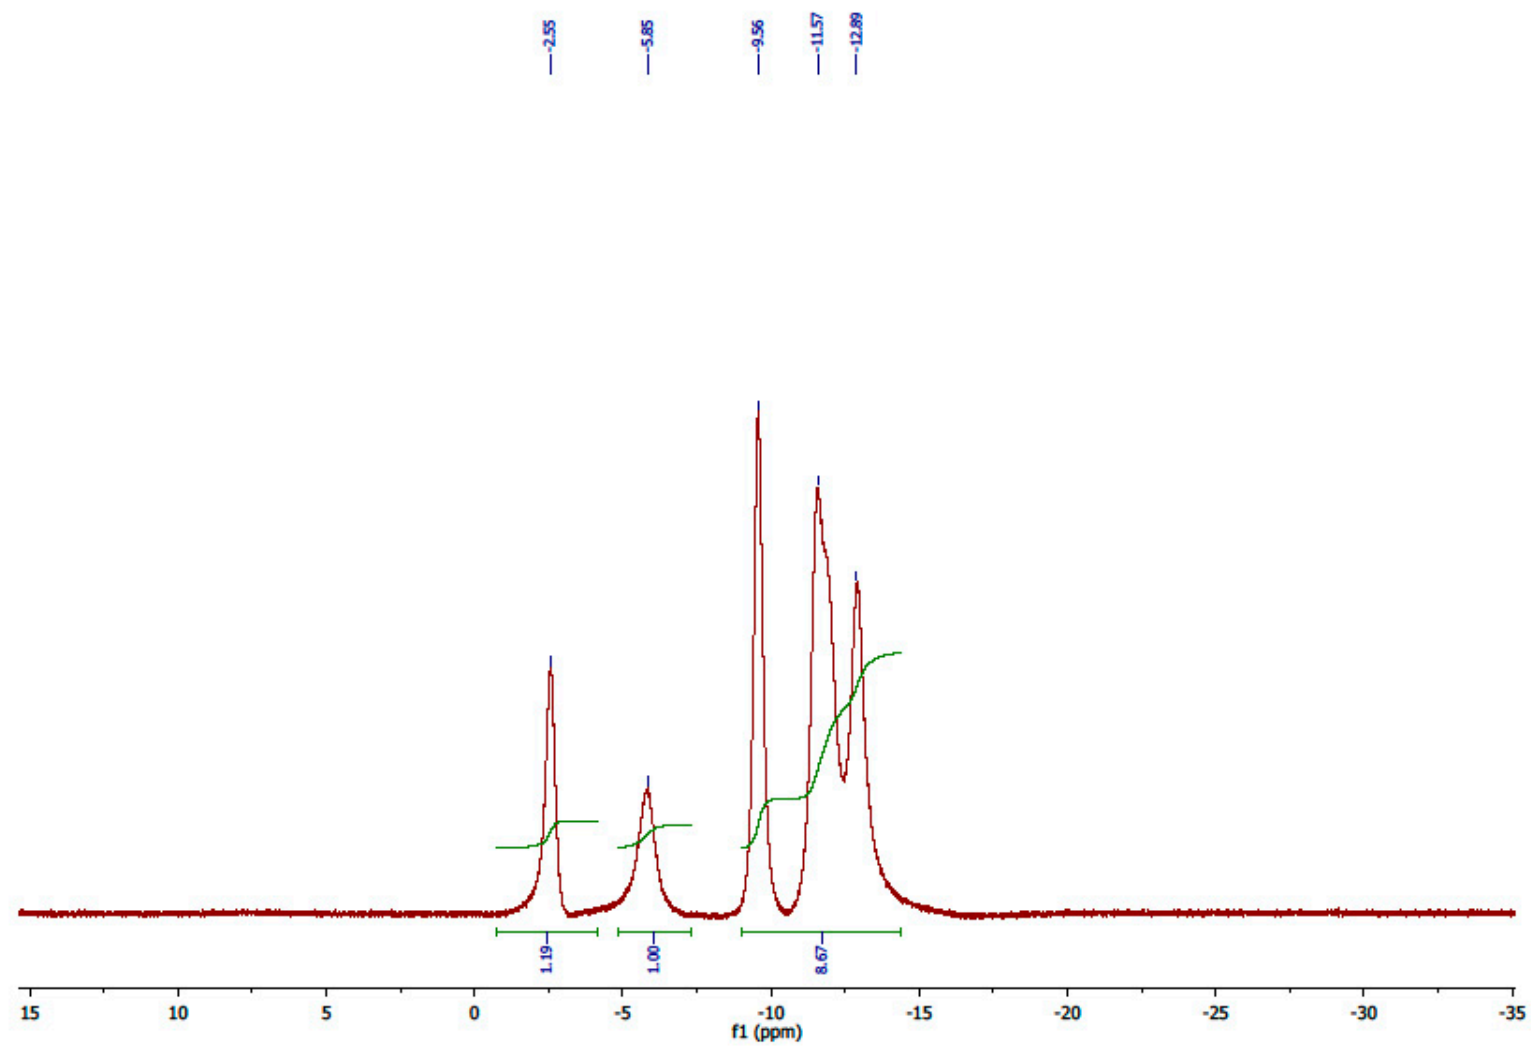

Figure S8.  $^{11}\text{B}$  NMR {H BB} spectrum of compound 8.

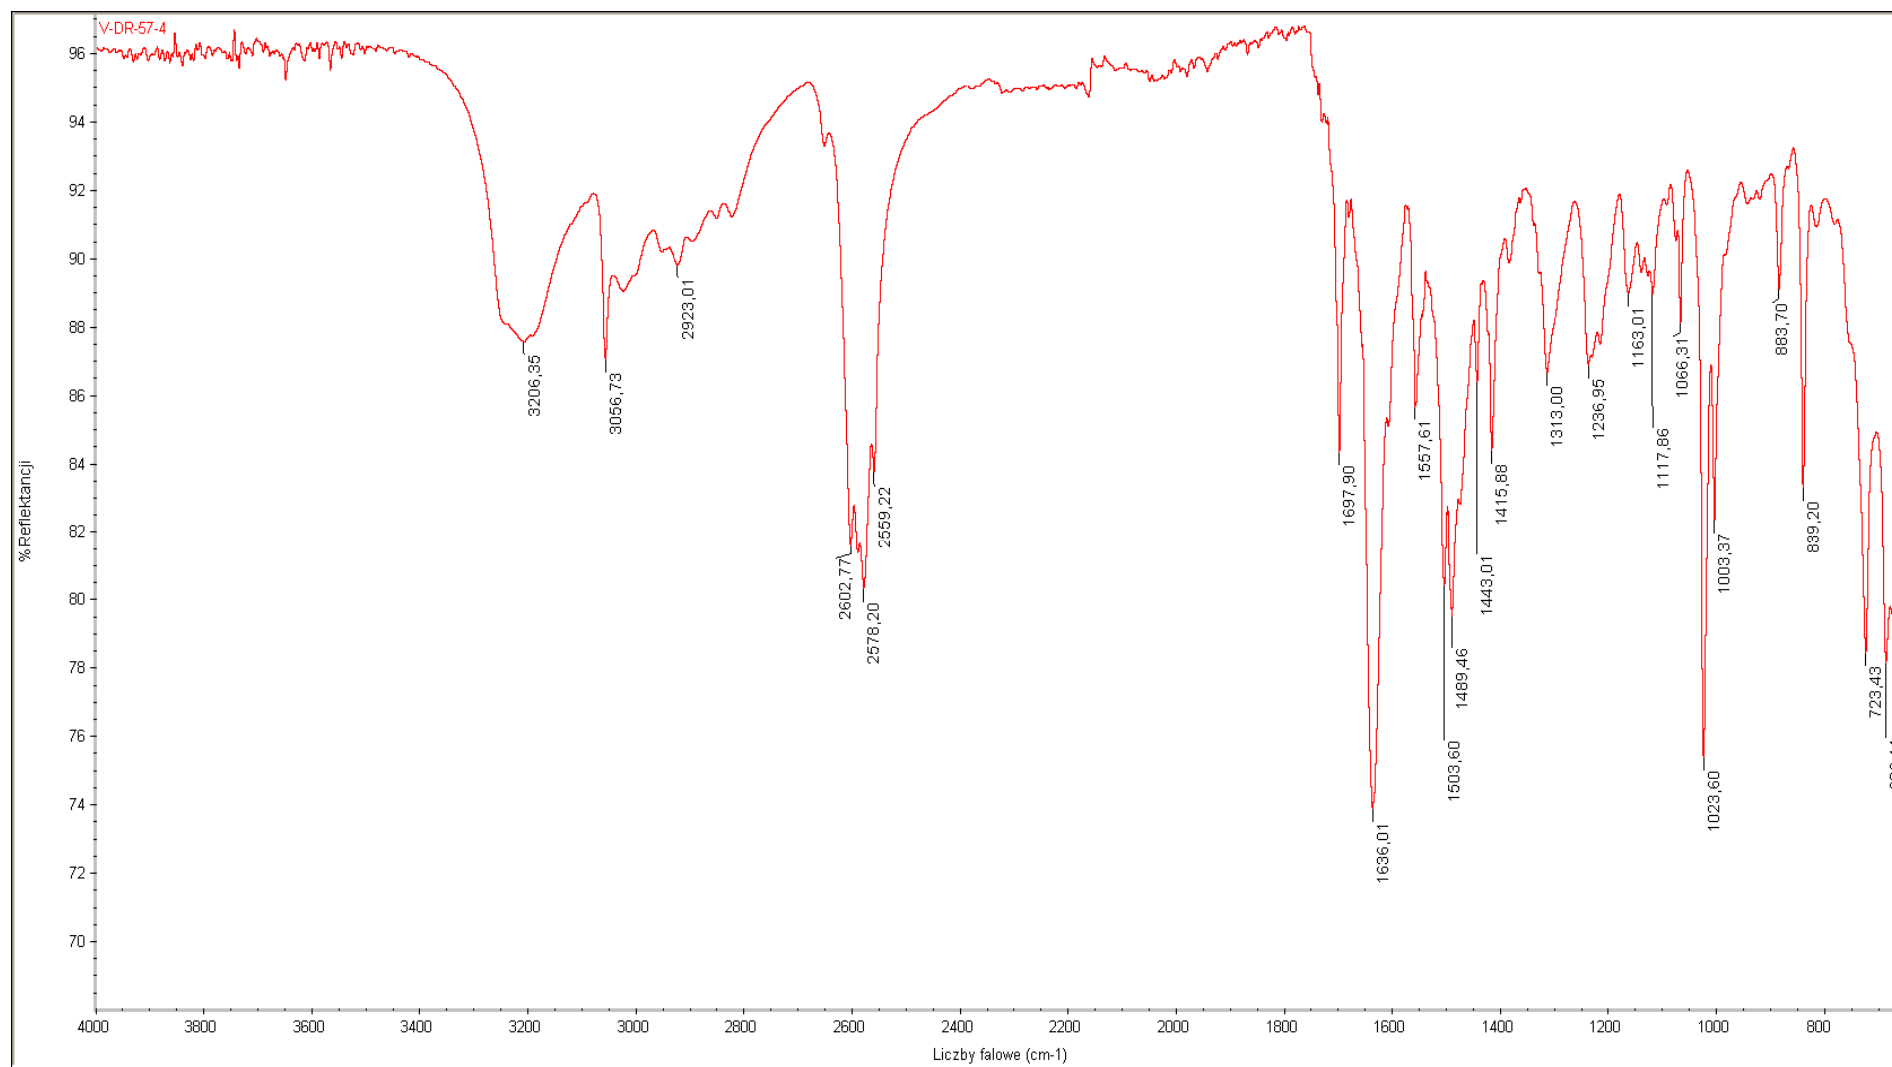

Figure S9. IR spectrum of compound 8.

Spectrum Name: V-DR-57-4\_typ\_dod2  
Start Ion: 200  
End Ion: 450  
Source: APCI + 10.0 $\mu$ A 400C  
Capillary: 150V 300C Offset: 25V Span: 0V

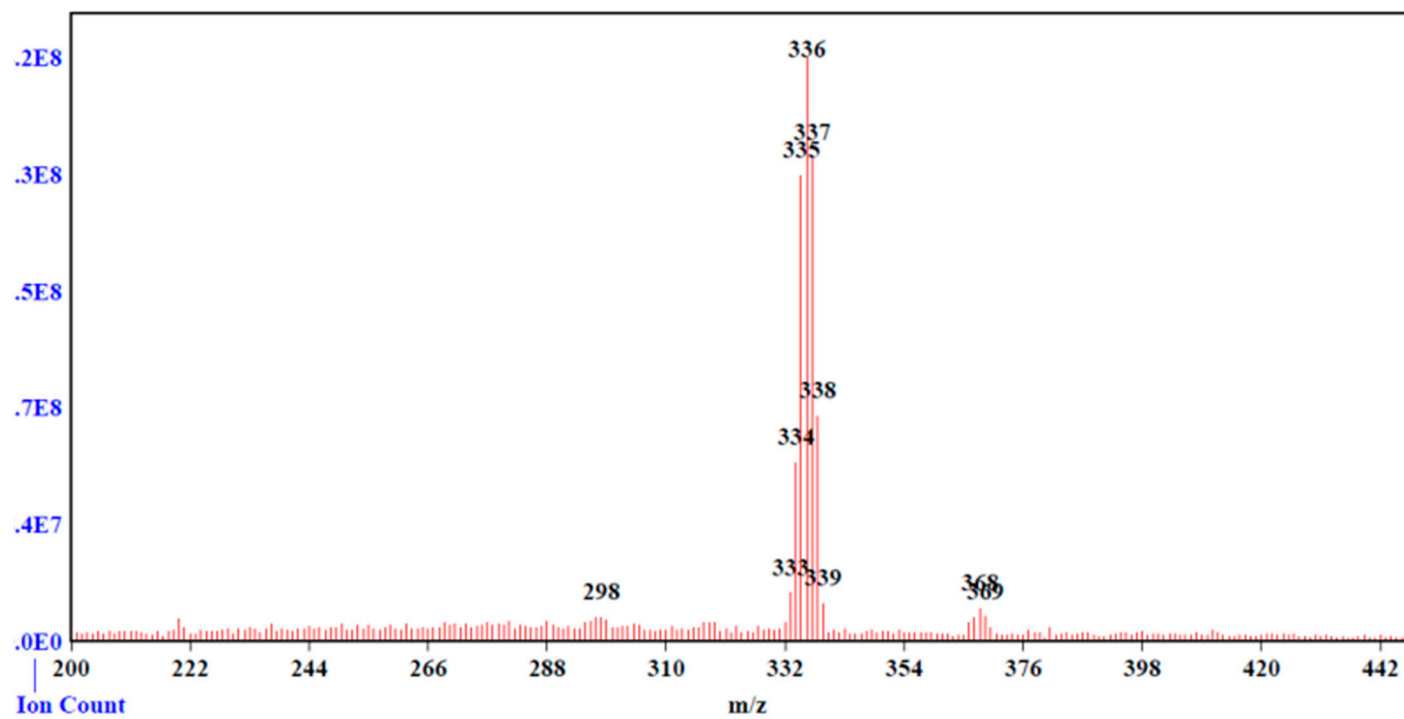

Figure S10. APCI-MS spectrum of compound 8.

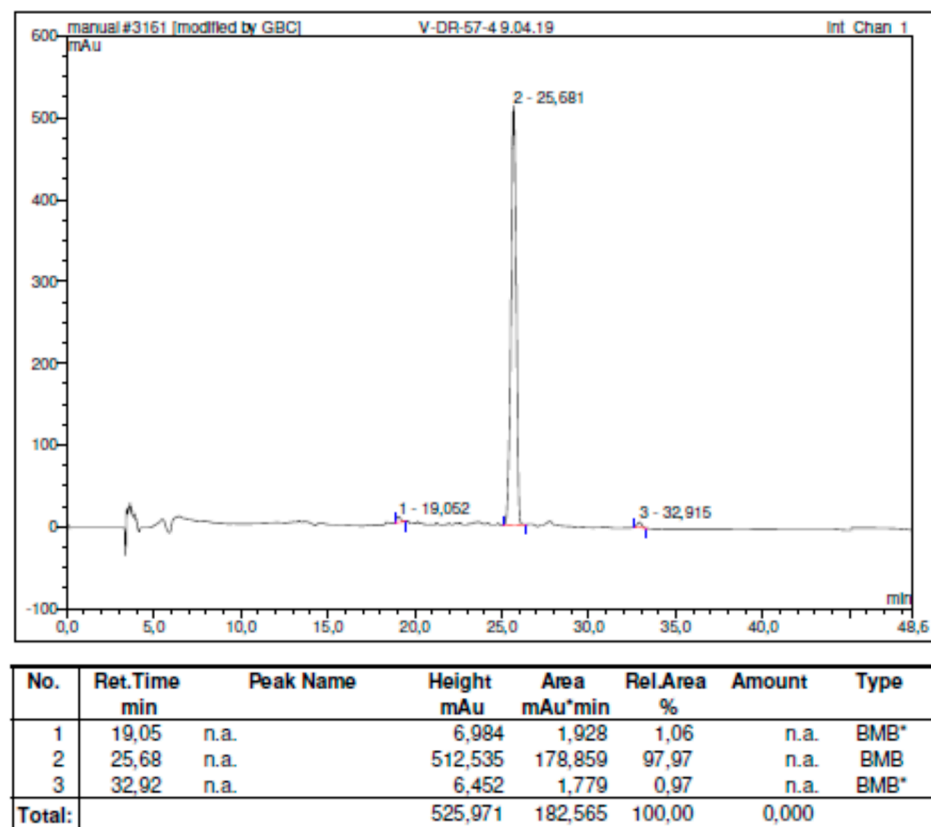

Figure S11. HPLC analysis of compound 8.

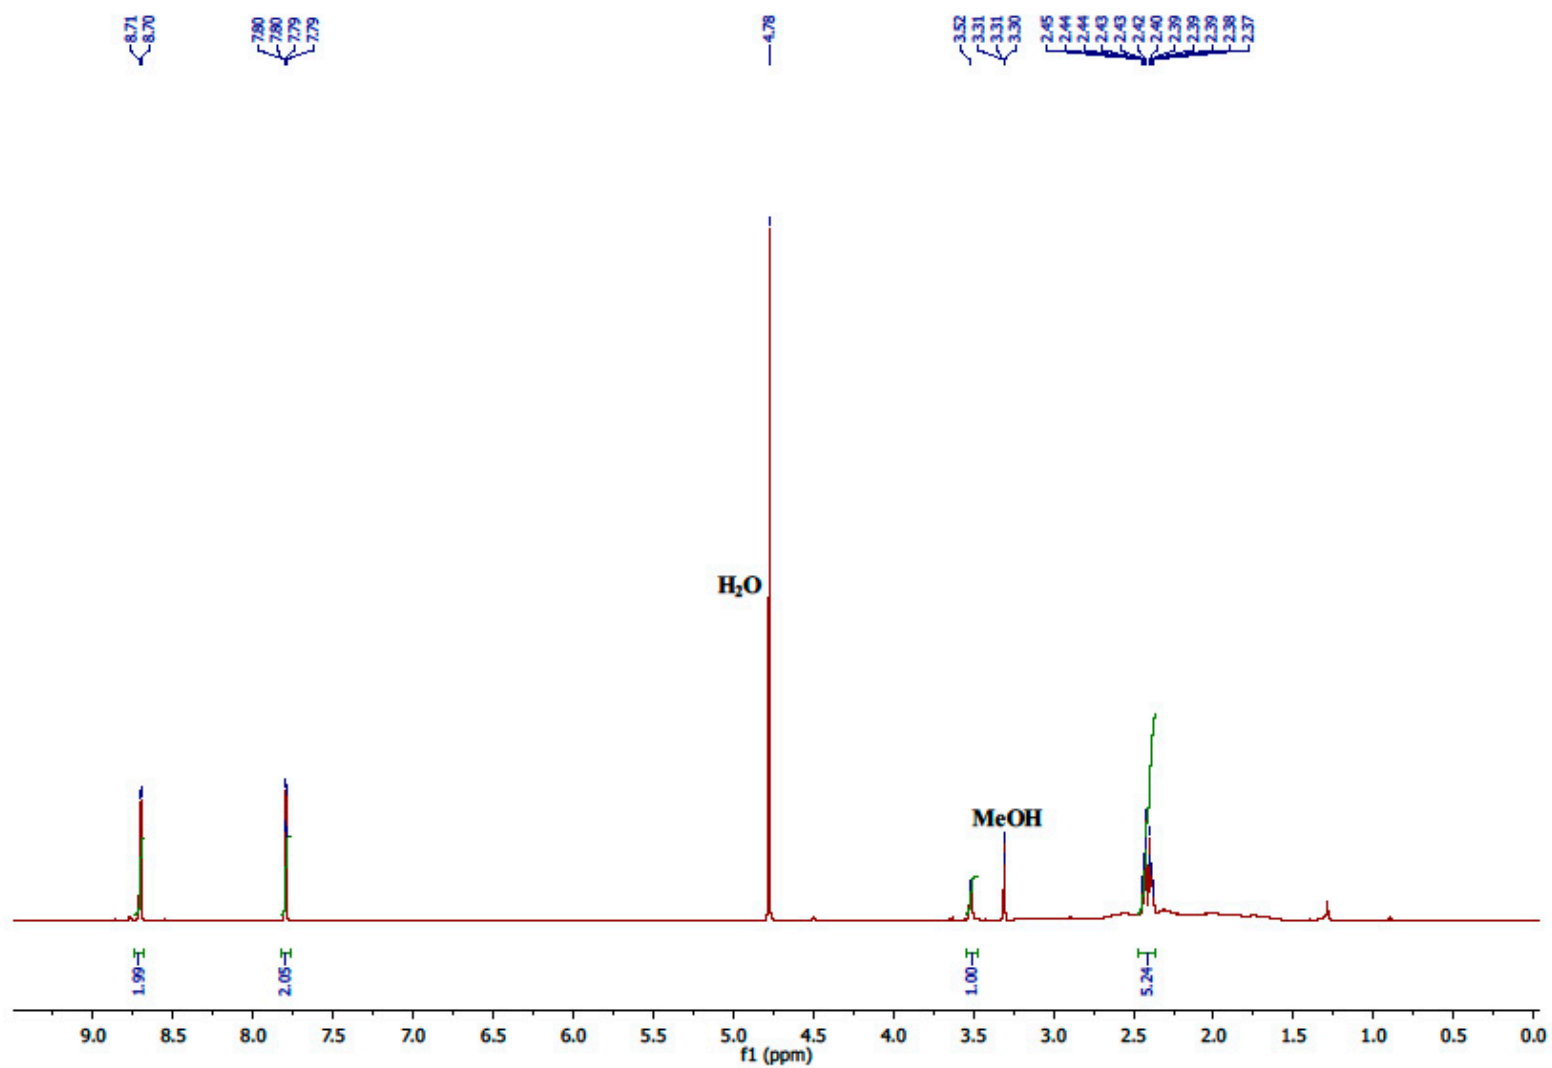

Figure S12. <sup>1</sup>H NMR spectrum of compound 9.

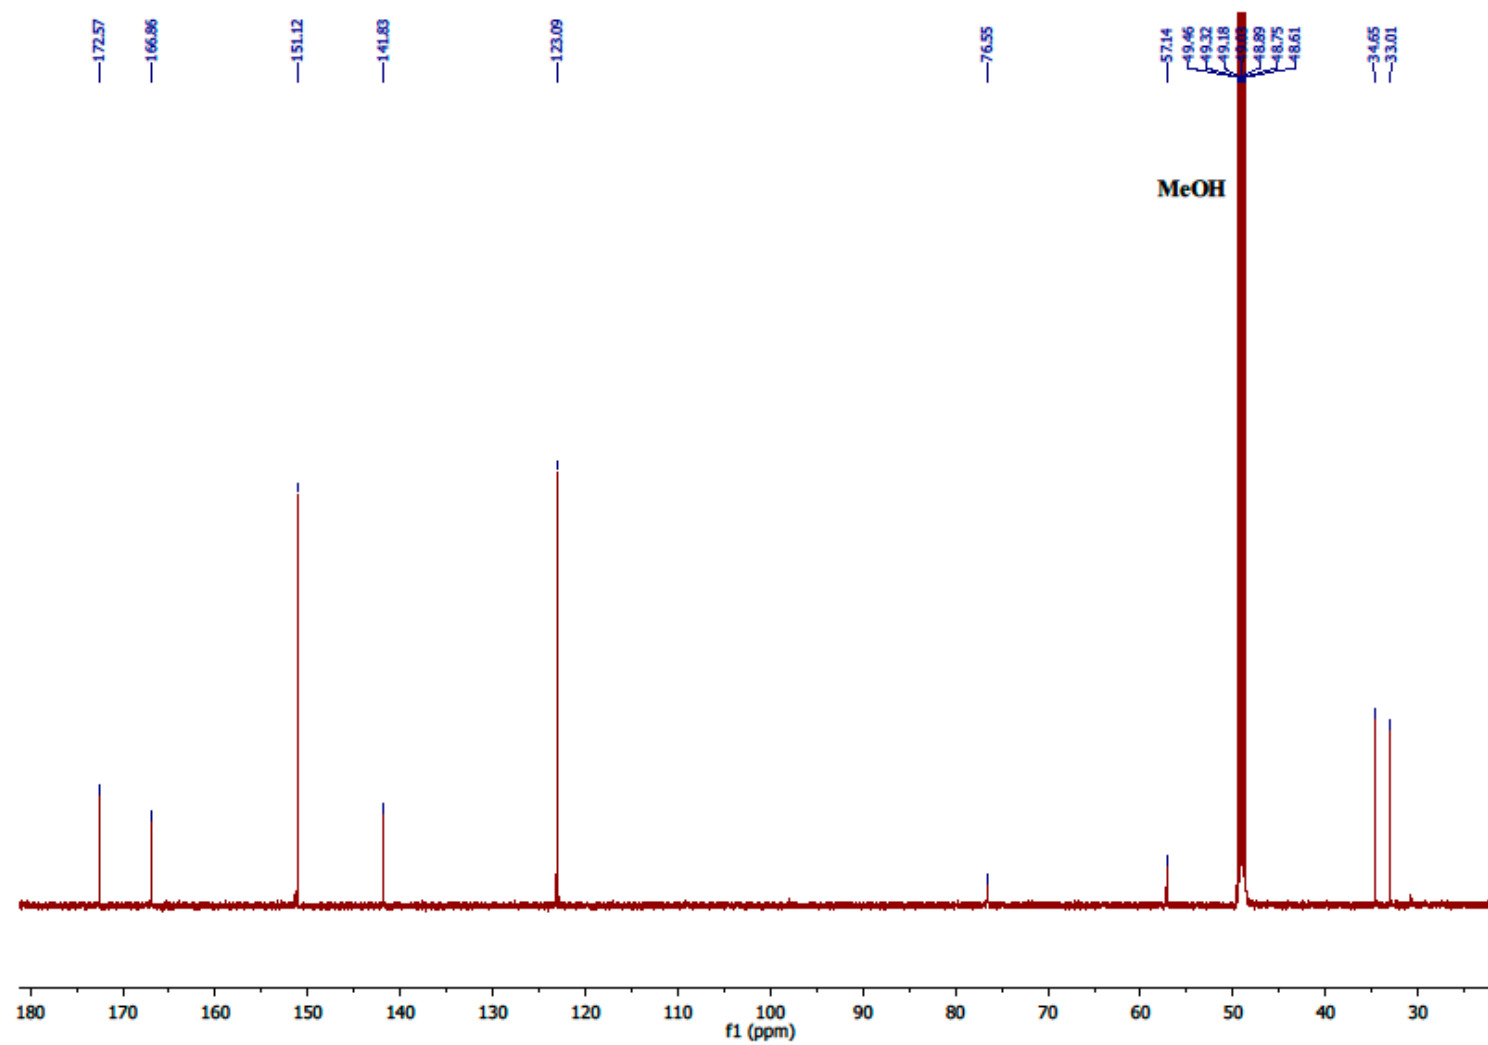

Figure S13. <sup>13</sup>C NMR spectrum of compound 9.



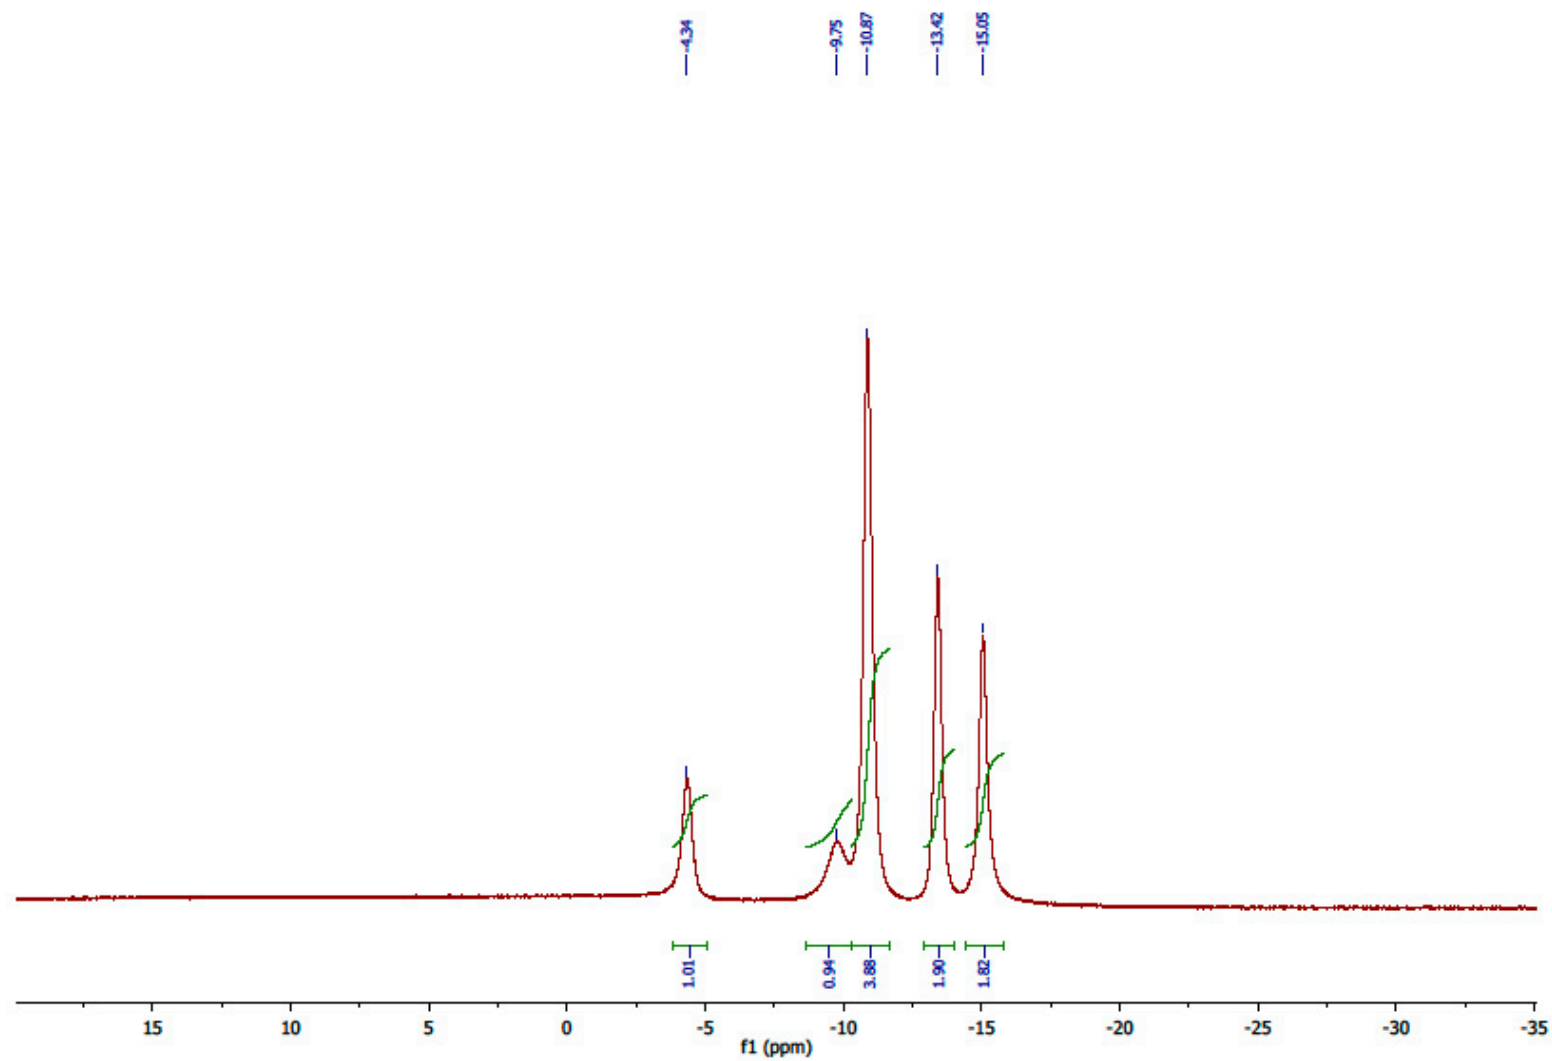

Figure S14.  $^{11}\text{B}$  NMR {H BB} spectrum of compound 9.

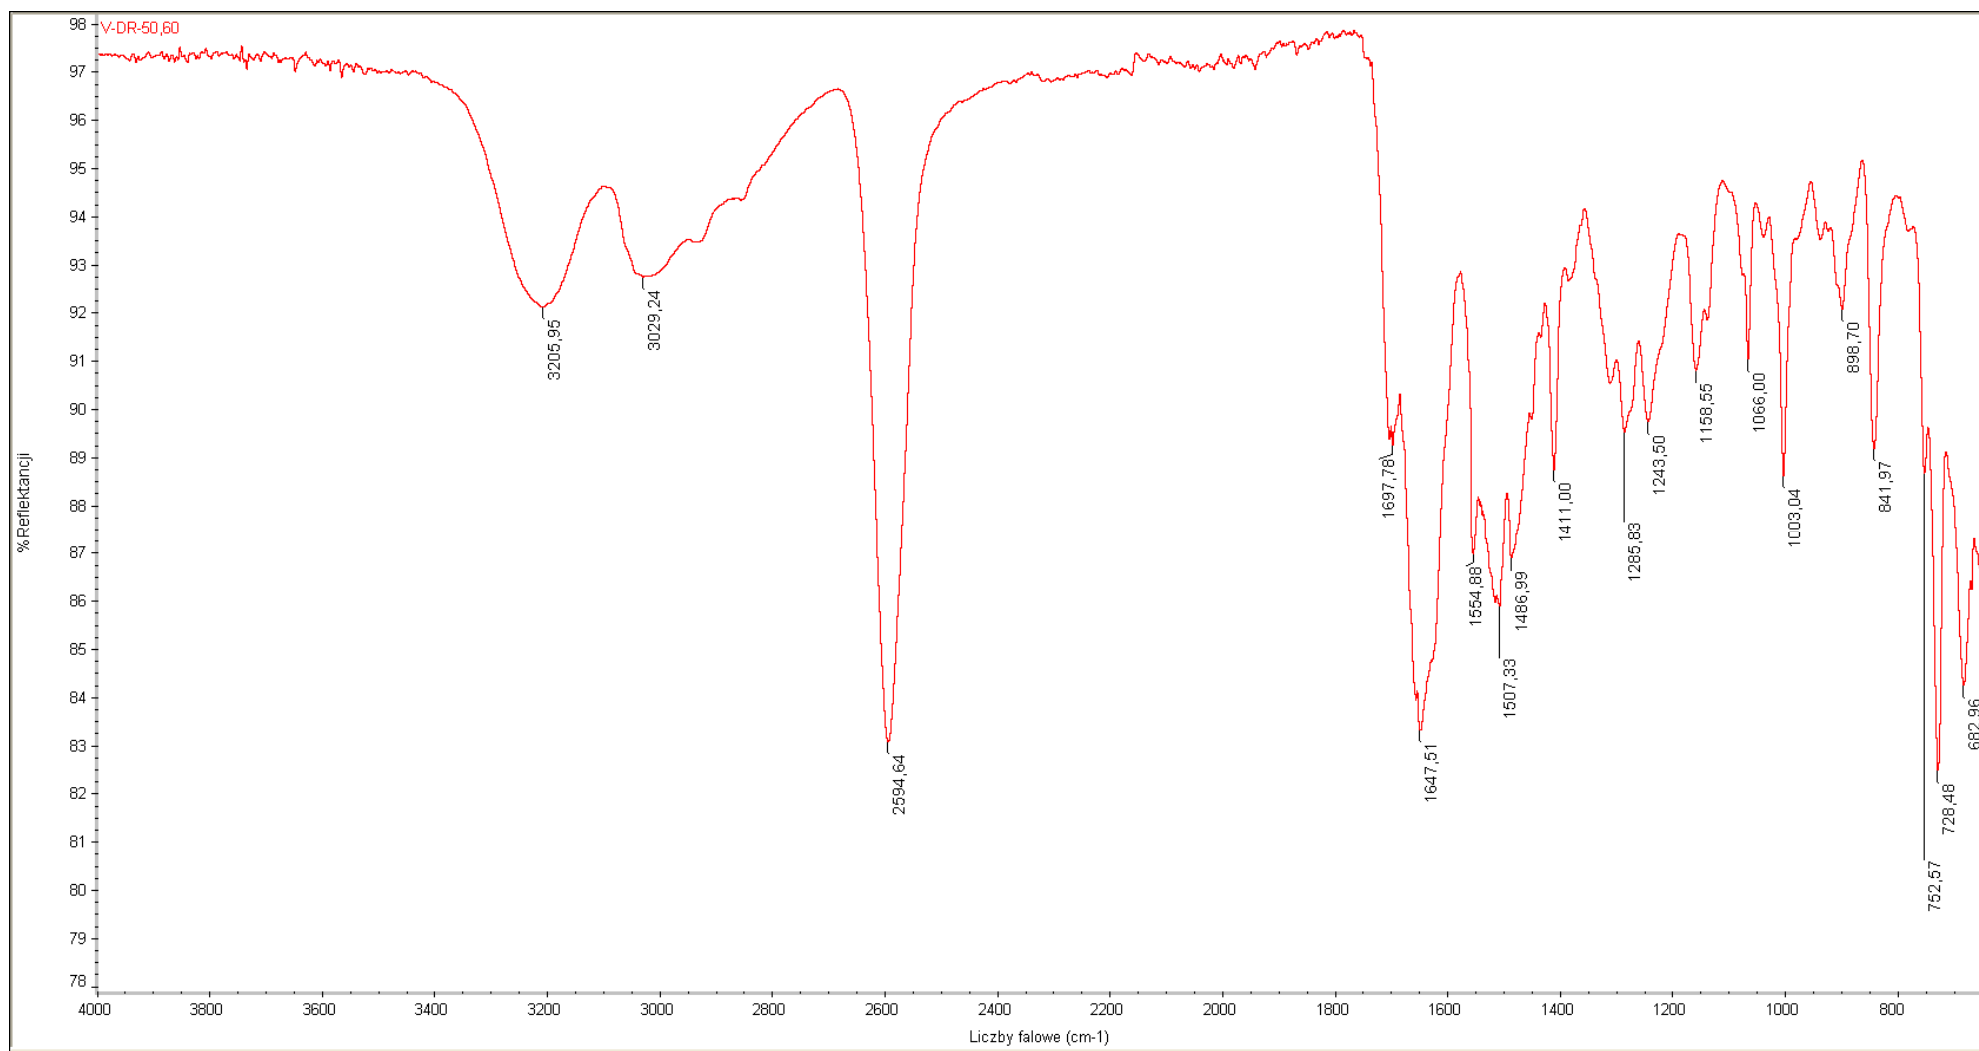

Figure S15. IR spectrum of compound 9.

Spectrum Name: V-DR-50\_60\_typ\_dod2  
Start Ion: 100  
End Ion: 500  
Source: APCI + 10.0 $\mu$ A 400C  
Capillary: 150V 300C Offset: 25V Span: 0V

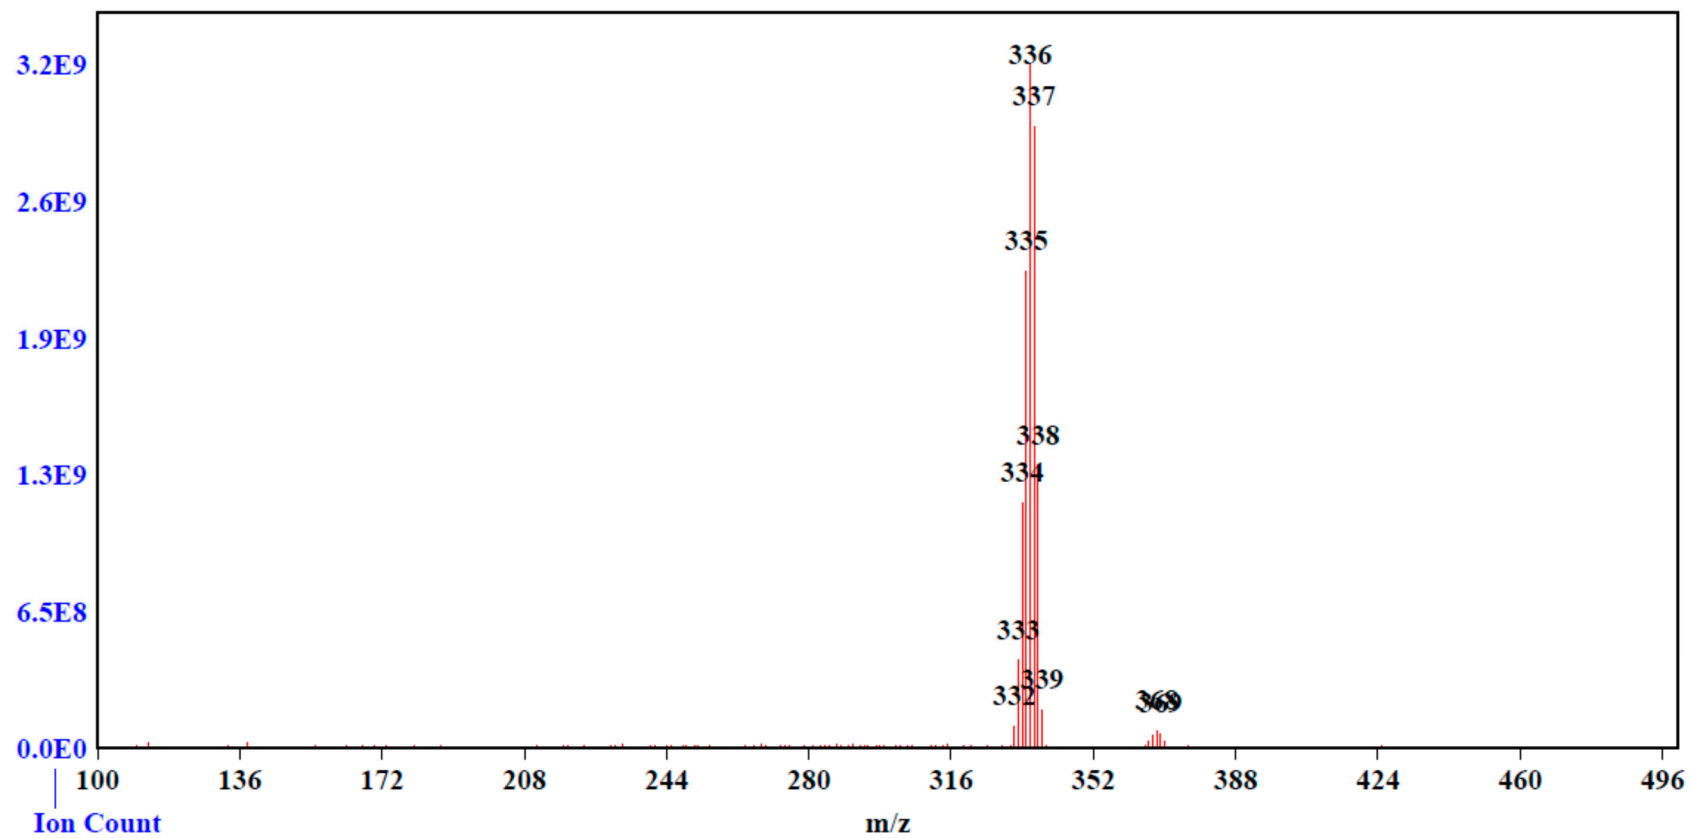

Figure S16. APCI-MS spectrum of compound 9.

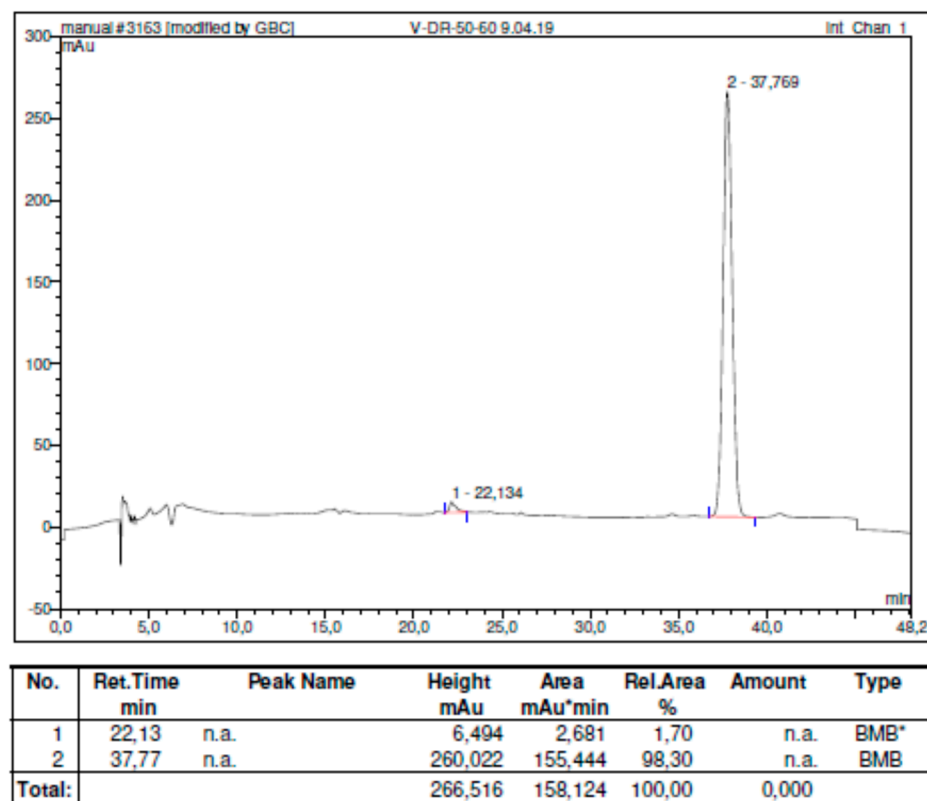

Figure S17. HPLC analysis of compound 9.

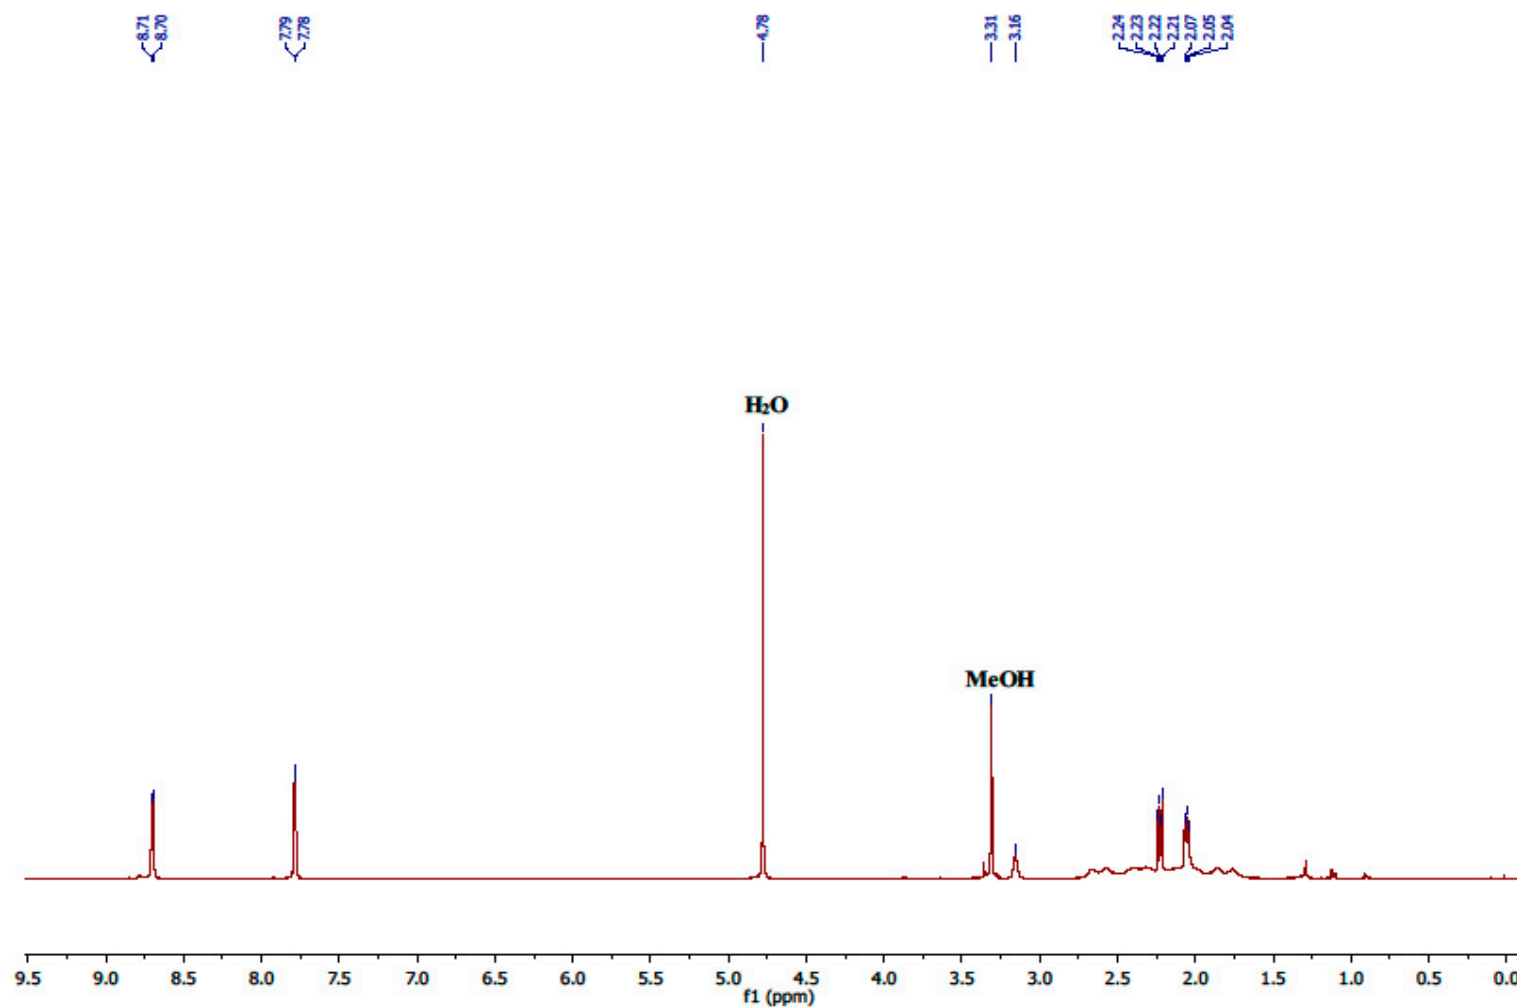

Figure S18. <sup>1</sup>H NMR spectrum of compound 10.

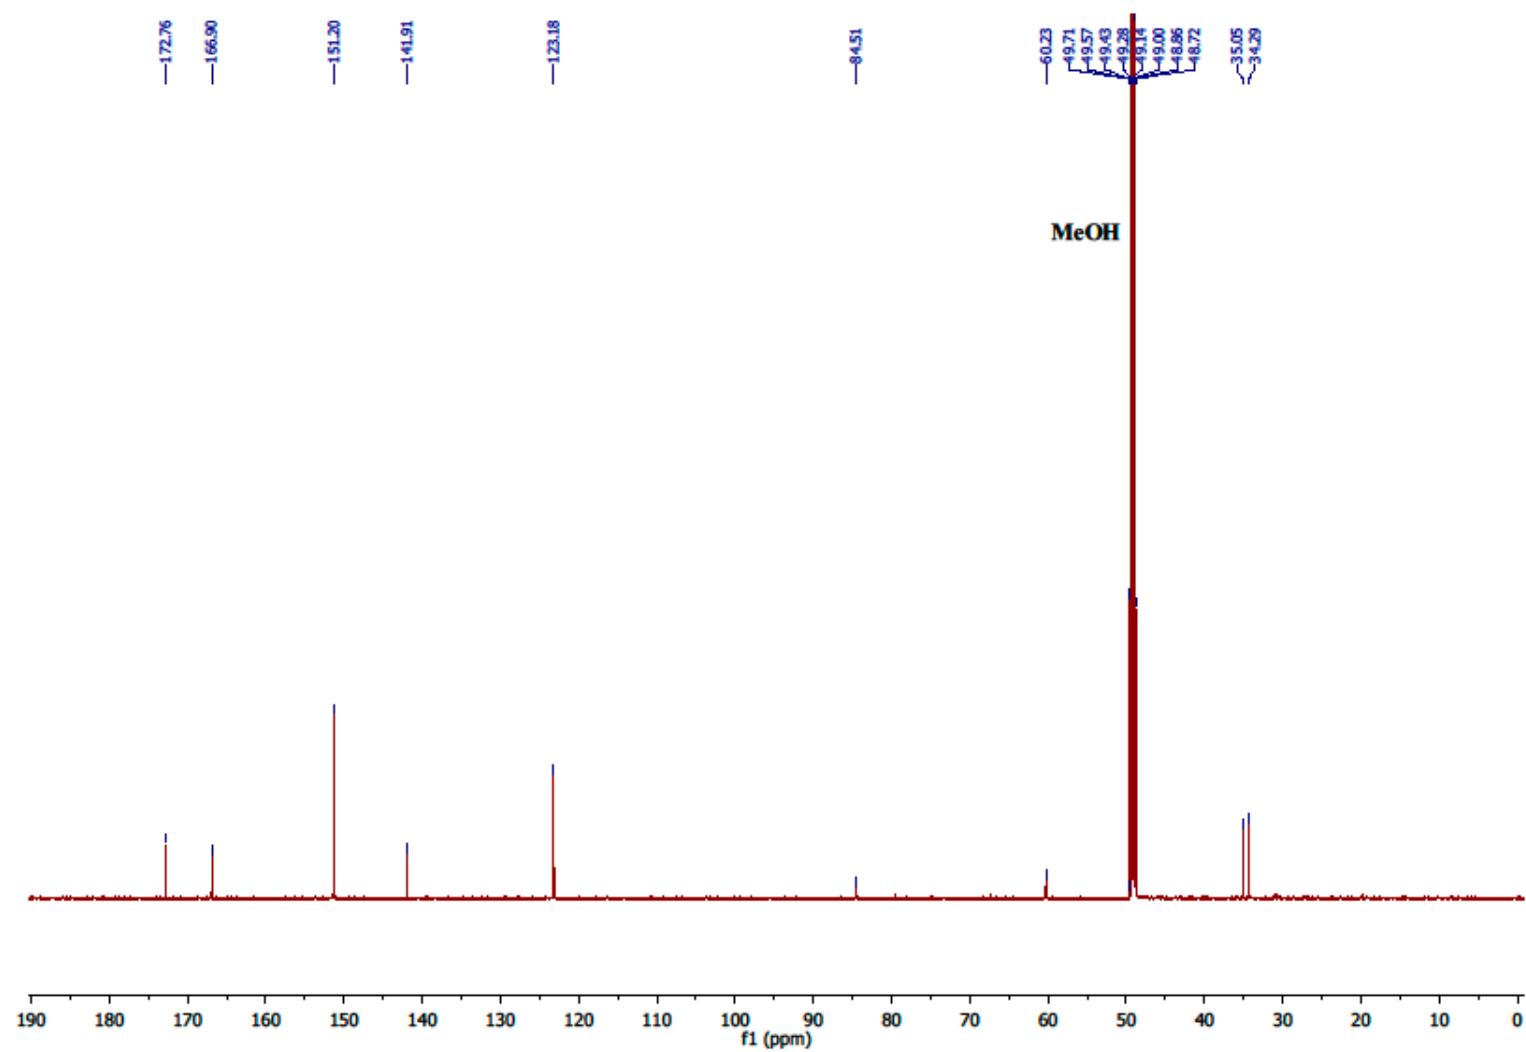

Figure S19. <sup>13</sup>C NMR spectrum of compound 10.

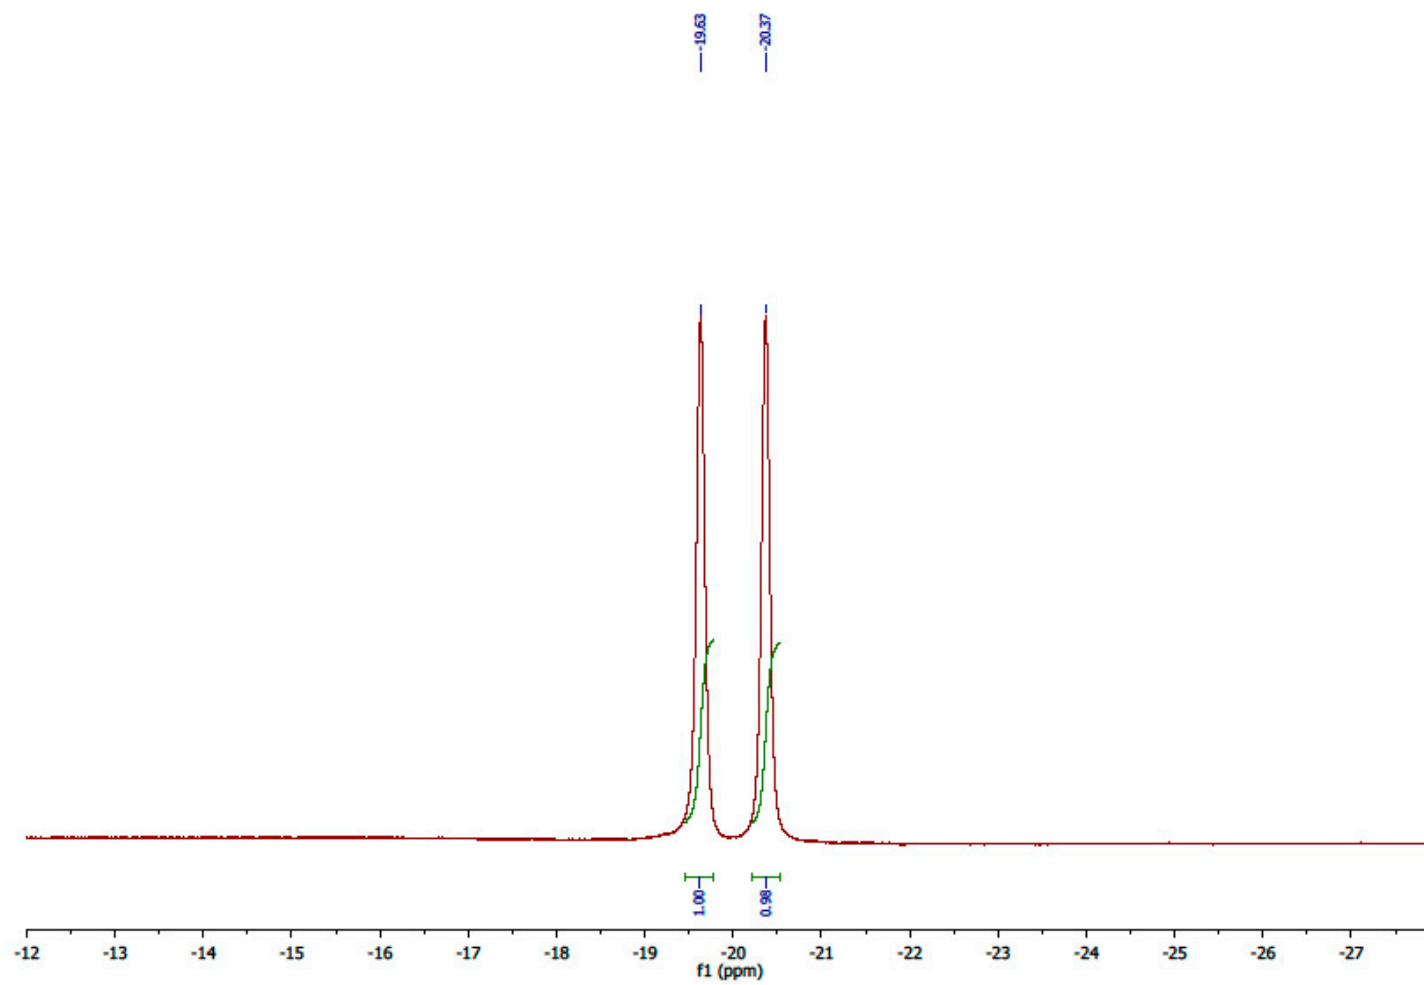

**Figure S20.**  $^{11}\text{B}$  NMR {H BB} spectrum of compound 10.

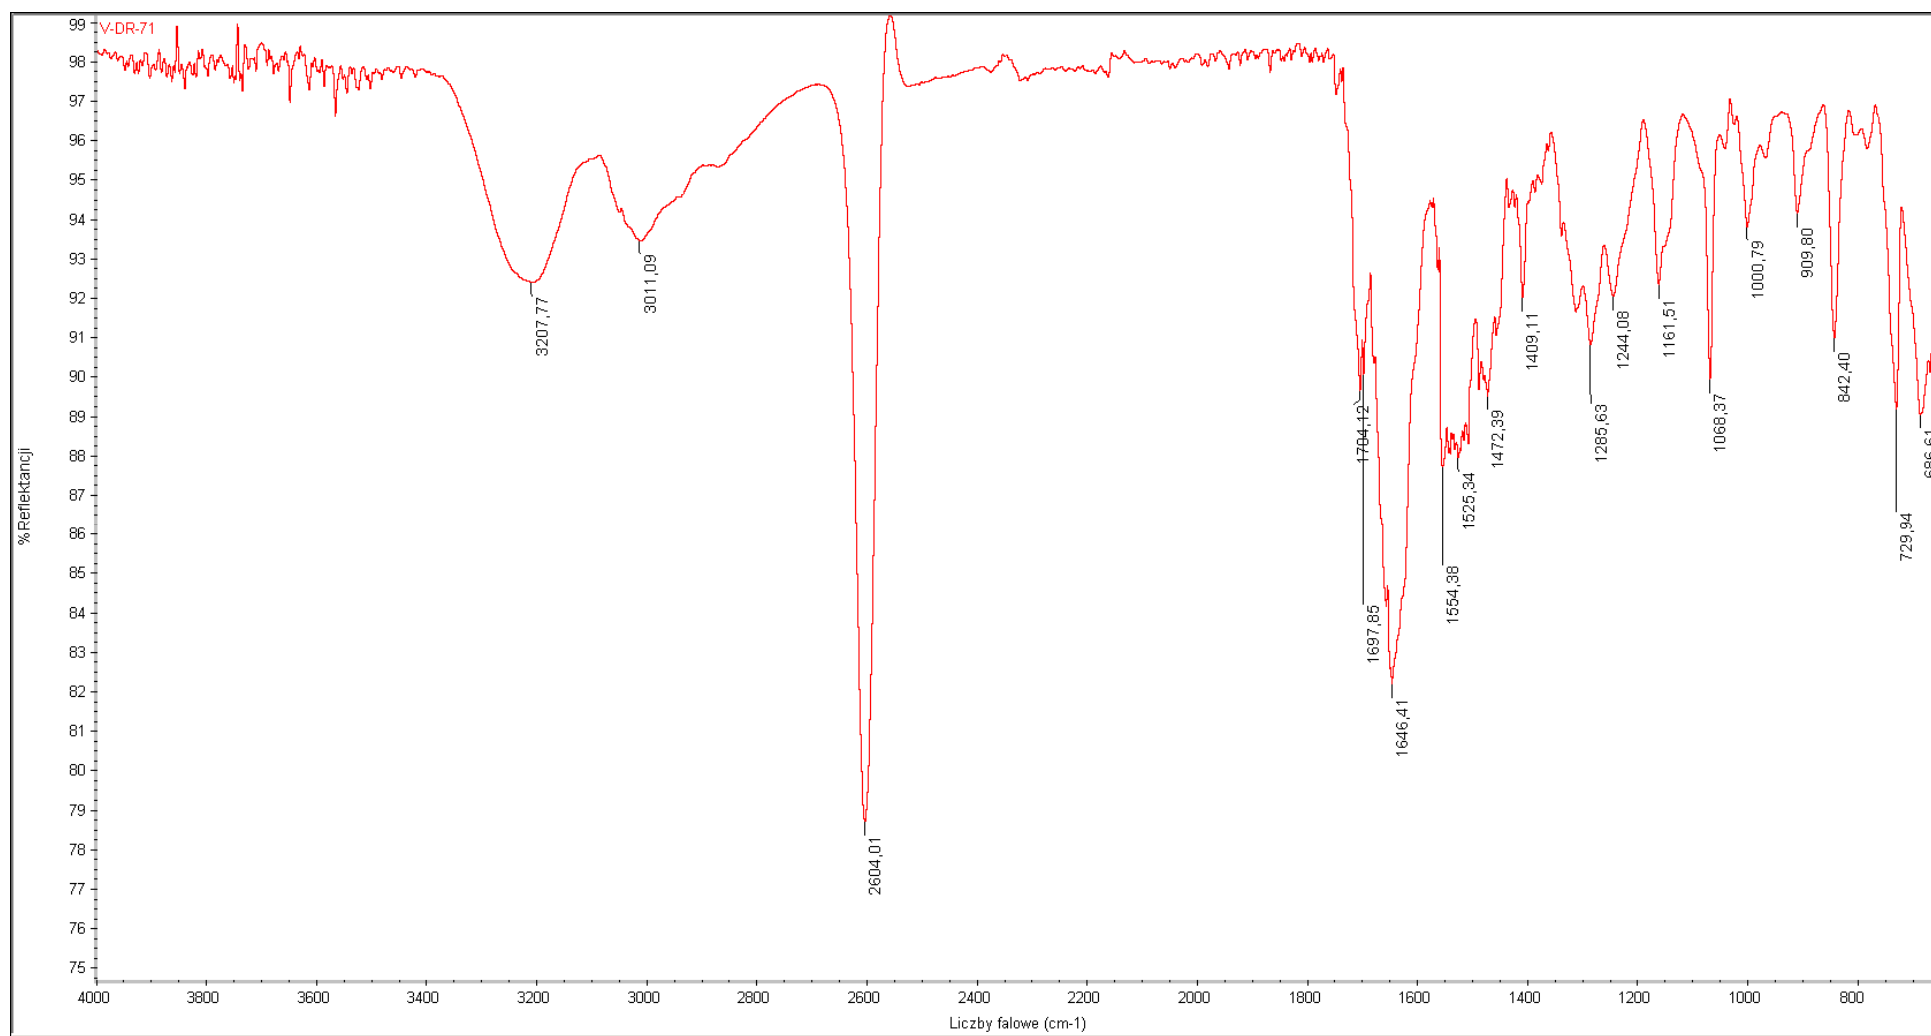

Figure S21. IR spectrum of compound 10.



Spectrum Name: V-DR-71\_typ\_dod  
Start Ion: 100  
End Ion: 600  
Source: APCI + 10.0 $\mu$ A 400C  
Capillary: 150V 300C Offset: 25V Span: 0V

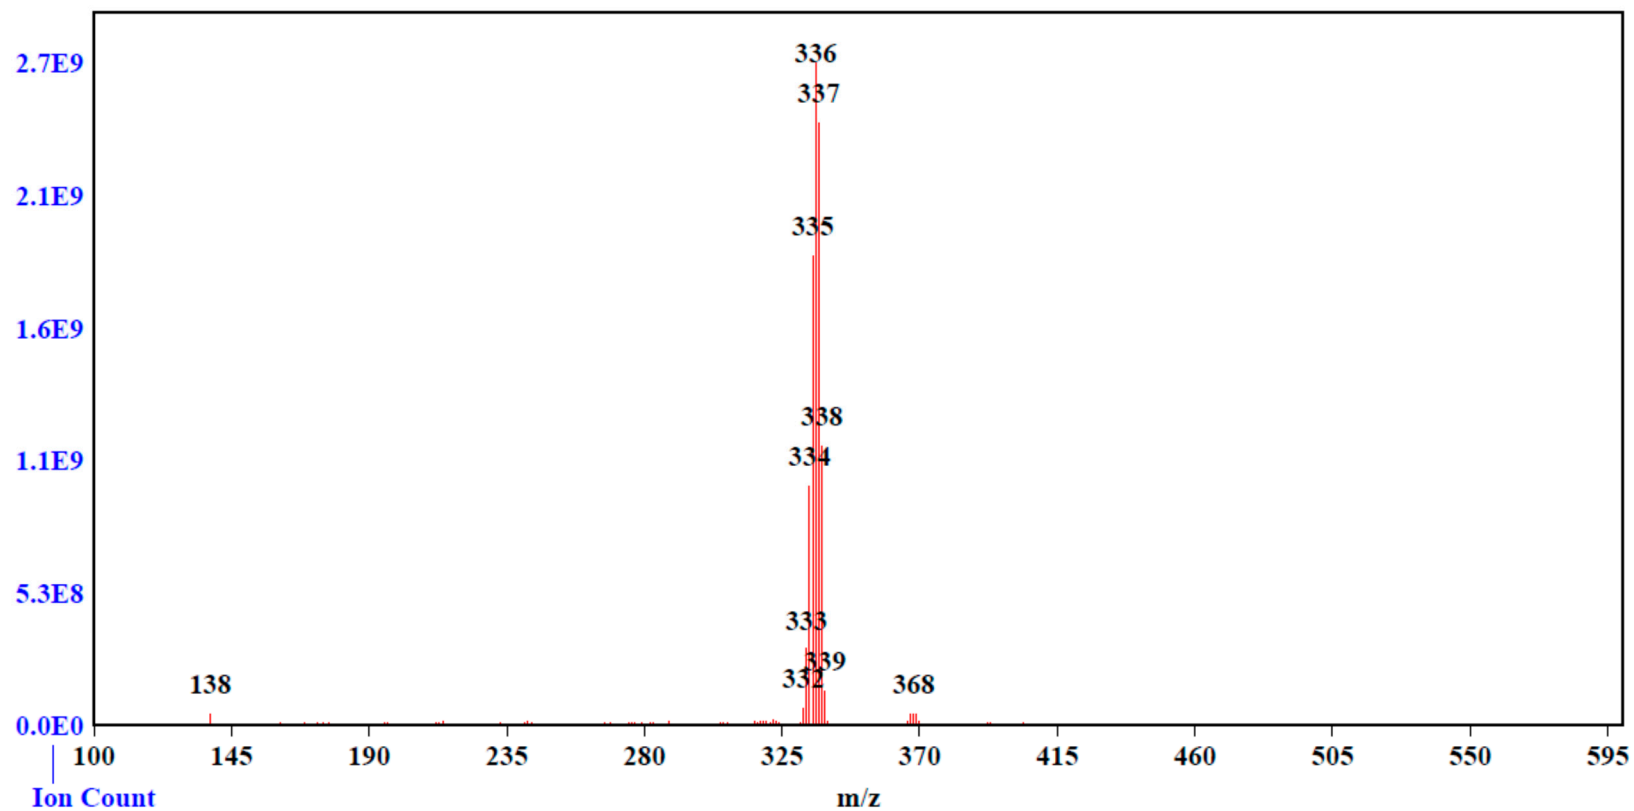

Figure S22. APCI-MS spectrum of compound 10.

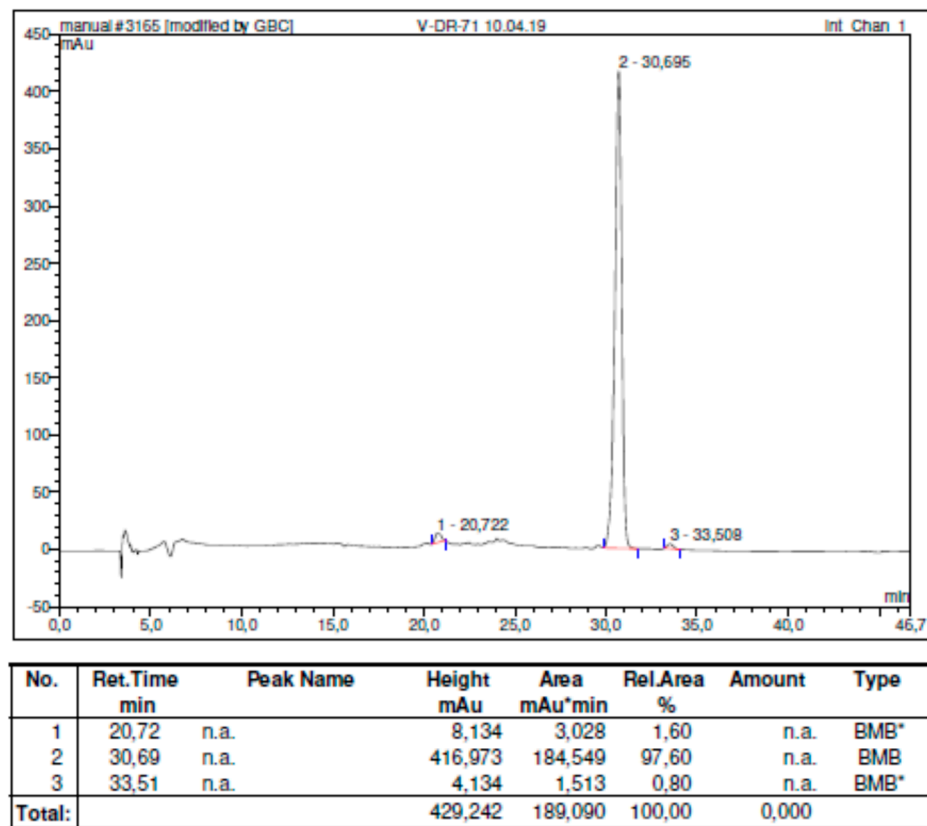

Figure S23. HPLC analysis of compound 10.

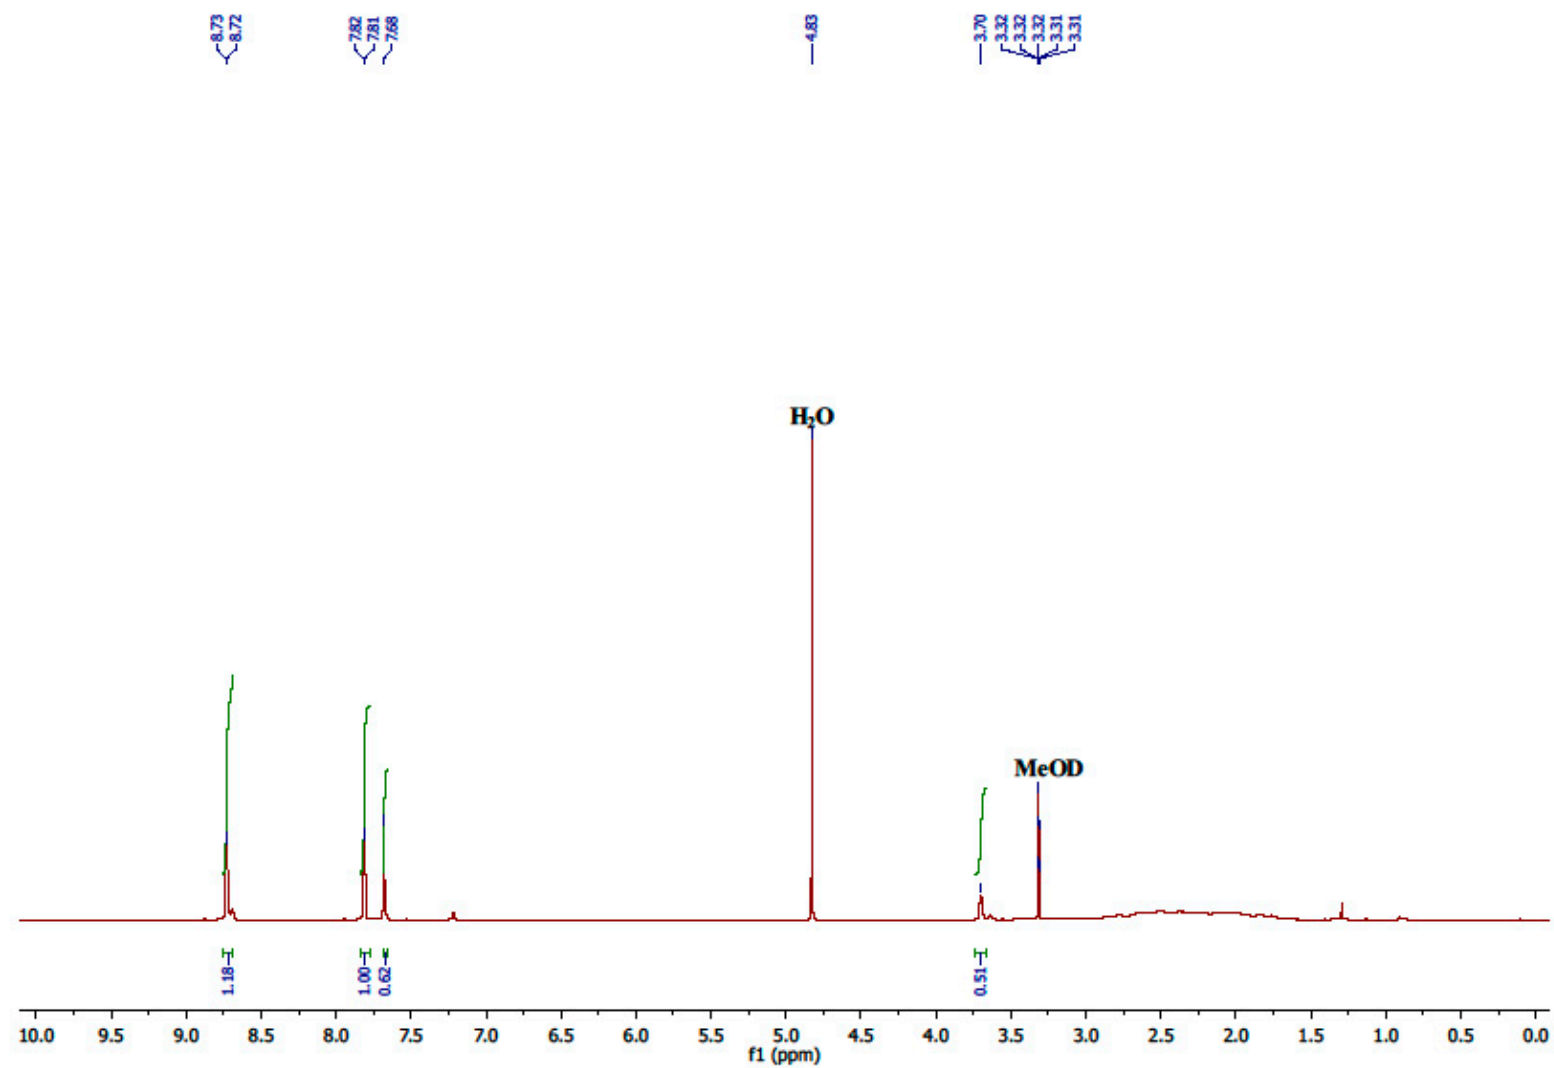

Figure S24. <sup>1</sup>H NMR spectrum of compound 14.

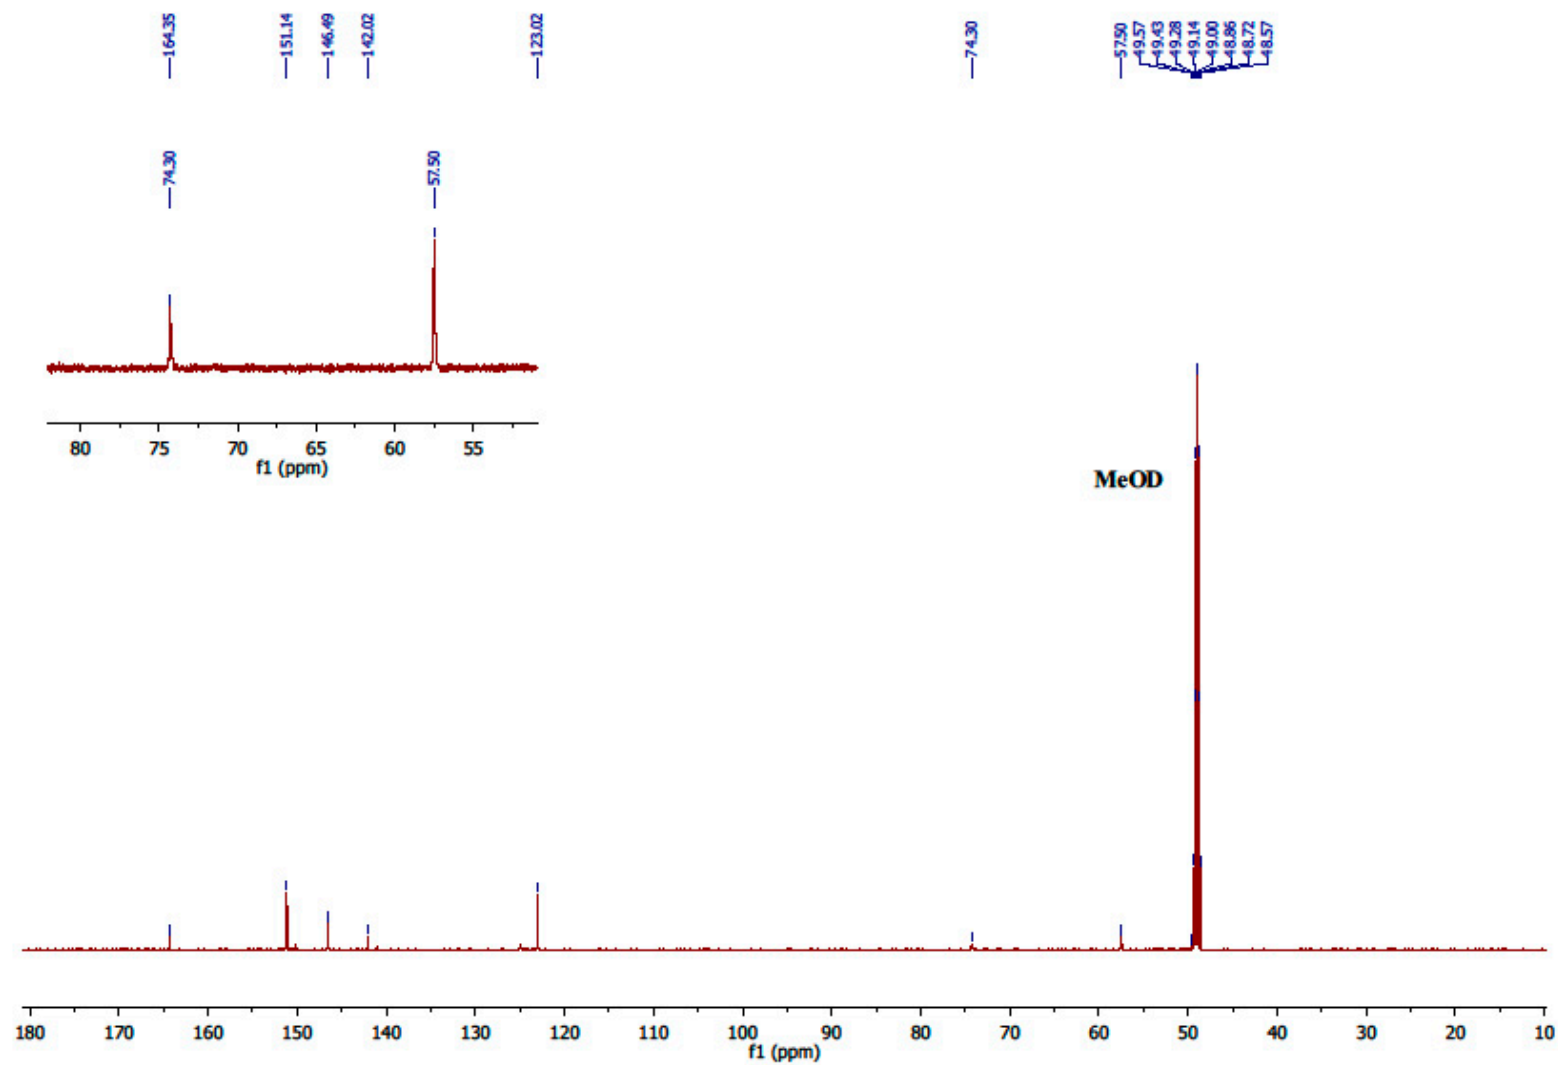

Figure S25.  $^{13}\text{C}$  NMR spectrum of compound 14.

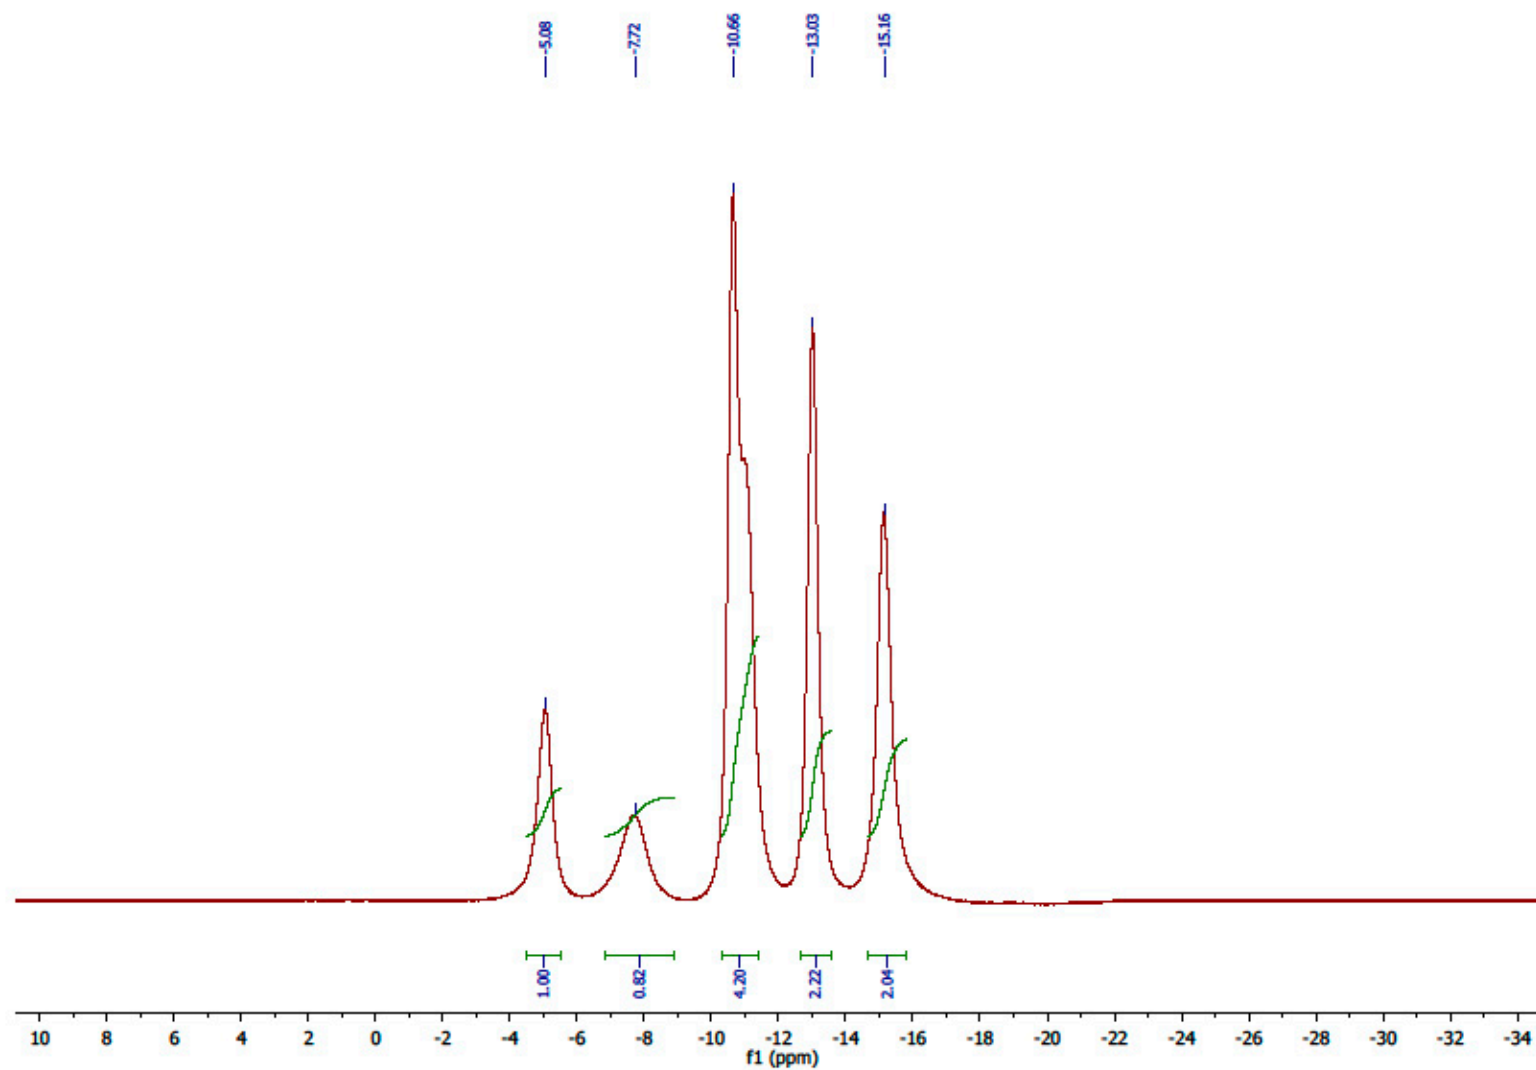

Figure S26.  $^{11}\text{B}$  NMR  $\{^1\text{H BB}\}$  spectrum of compound 14.

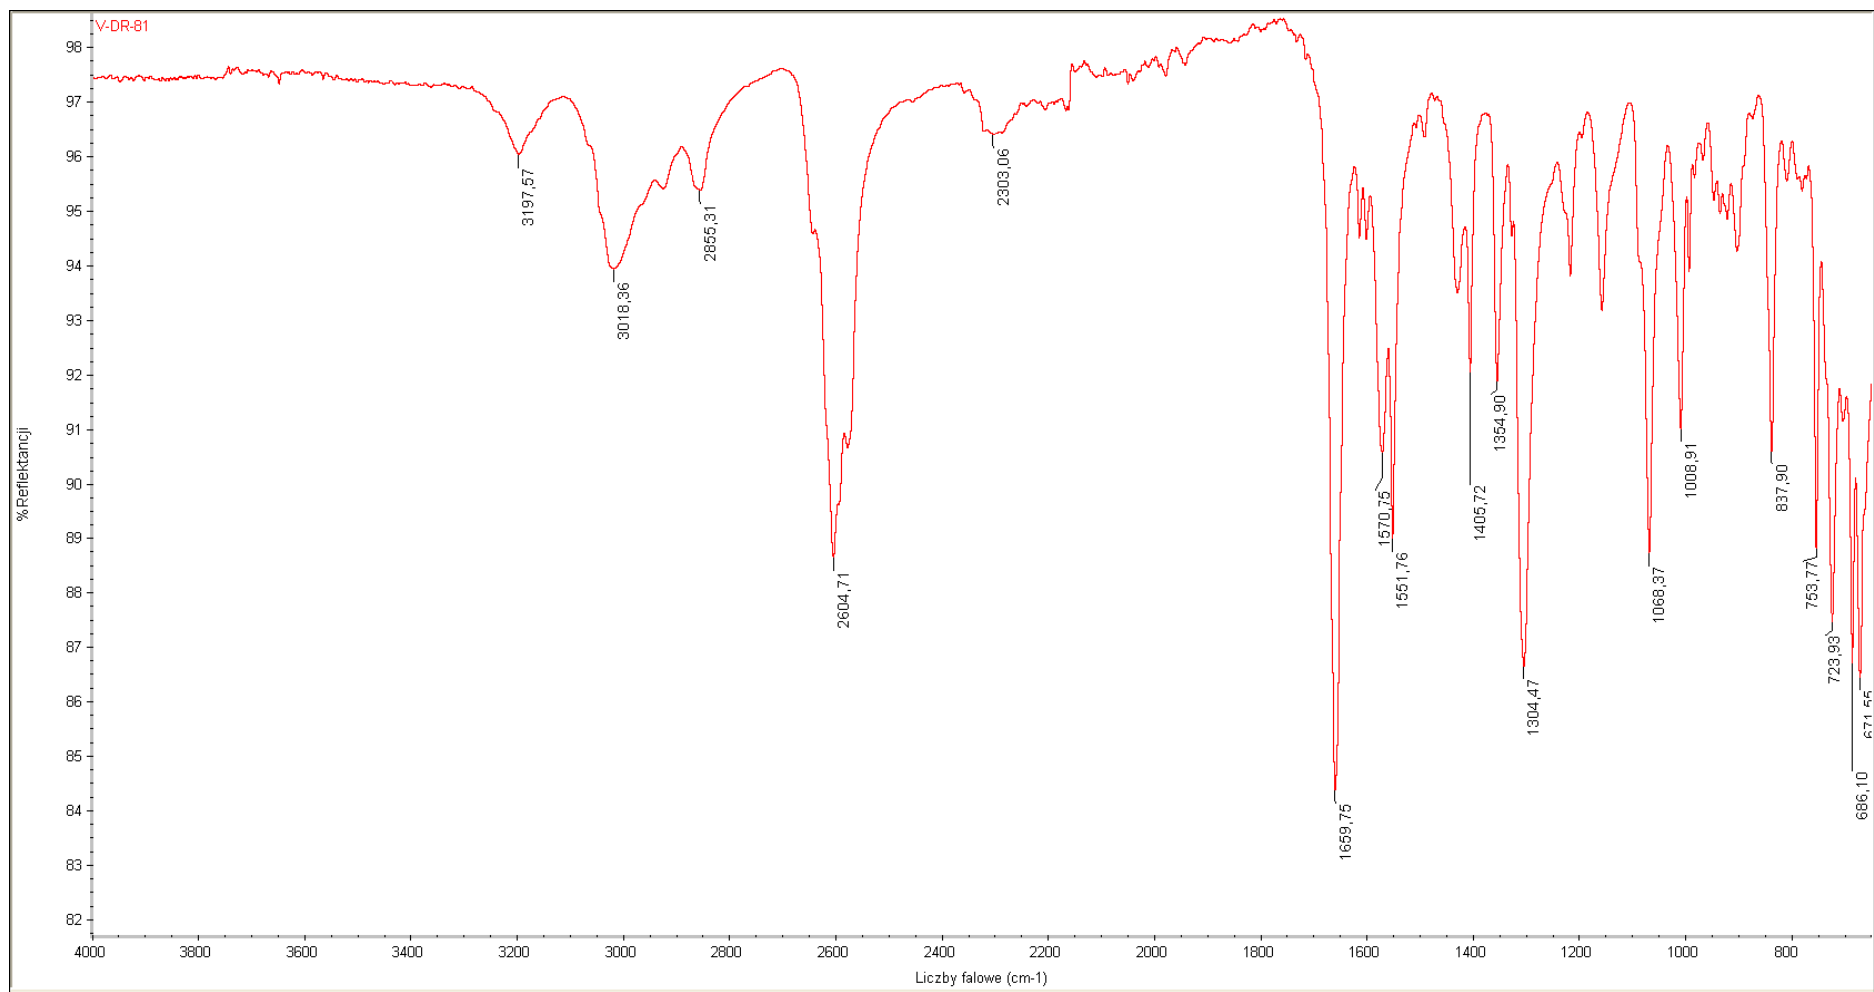

Figure S27. IR spectrum of compound 14.

Spectrum Name: V-DR-81\_rob\_dod  
Start Ion: 200  
End Ion: 400  
Source: APCI + 10.0 $\mu$ A 400C  
Capillary: 180V 300C Offset: 30V Span: 20V

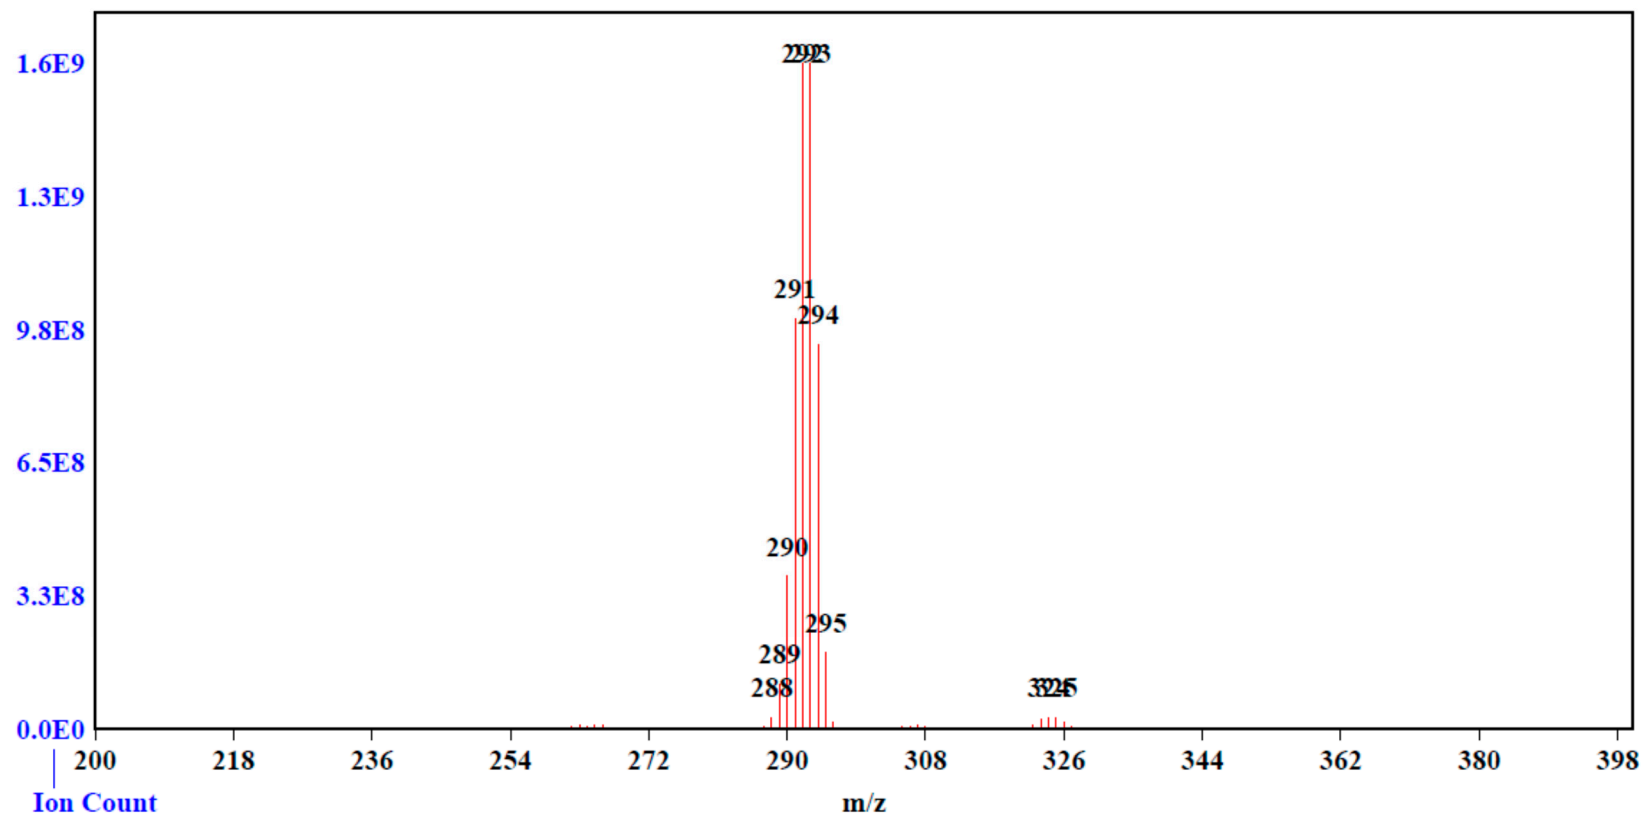

Figure S28. MS spectrum of compound 14.

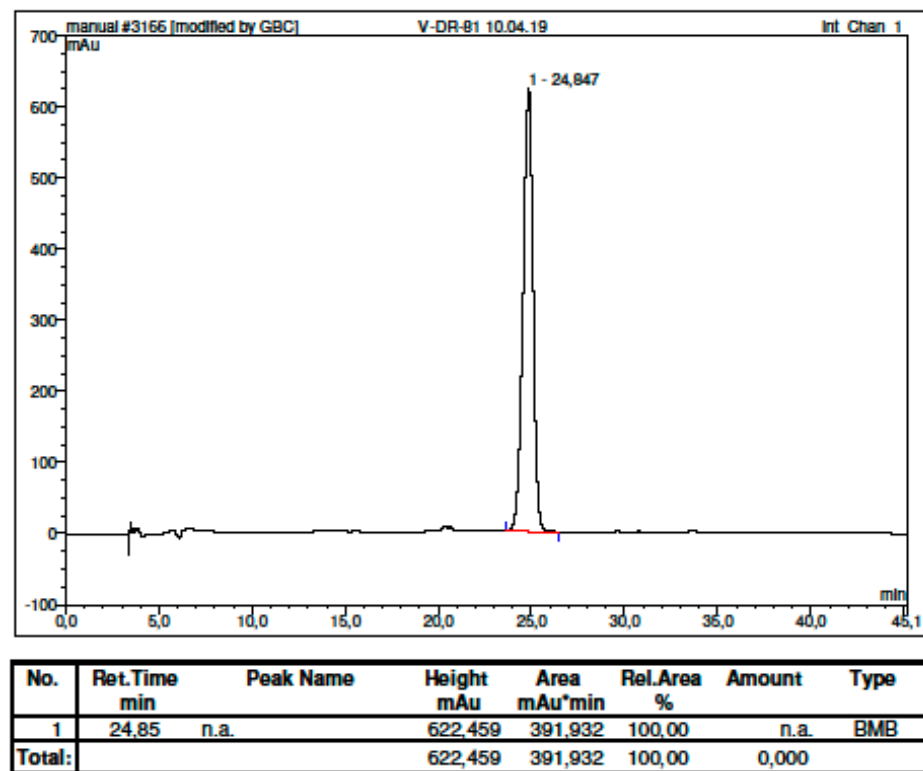

Figure S29. HPLC analysis of compound 14.



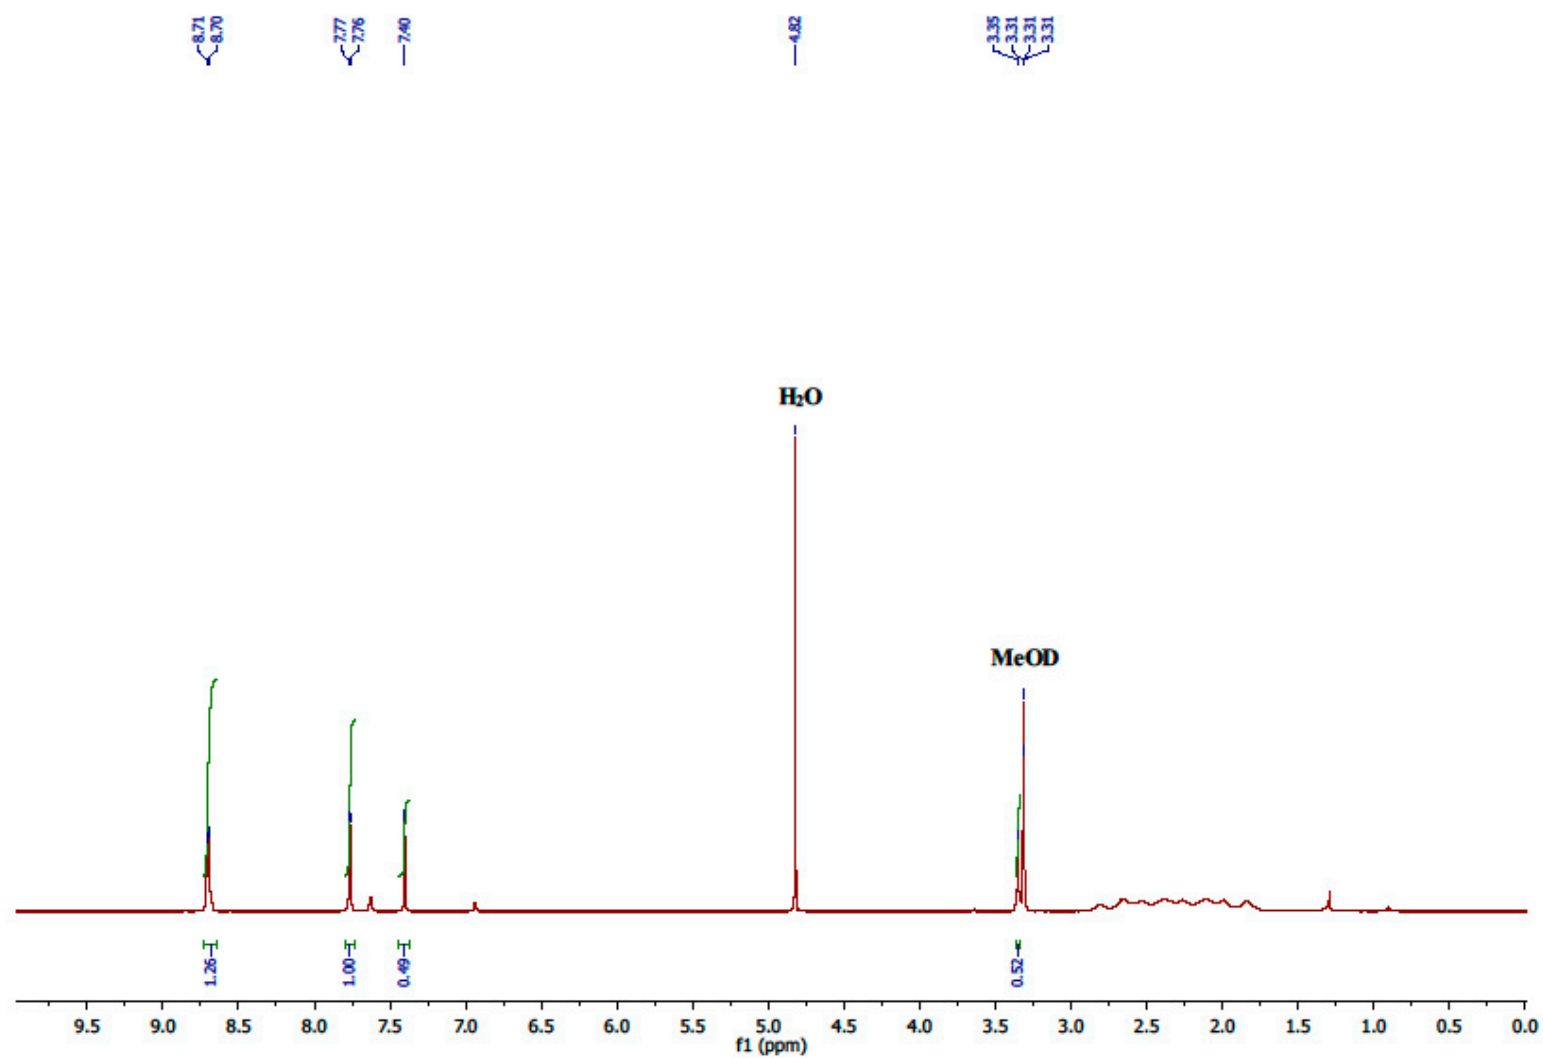

Figure S30. <sup>1</sup>H NMR spectrum of compound 15.

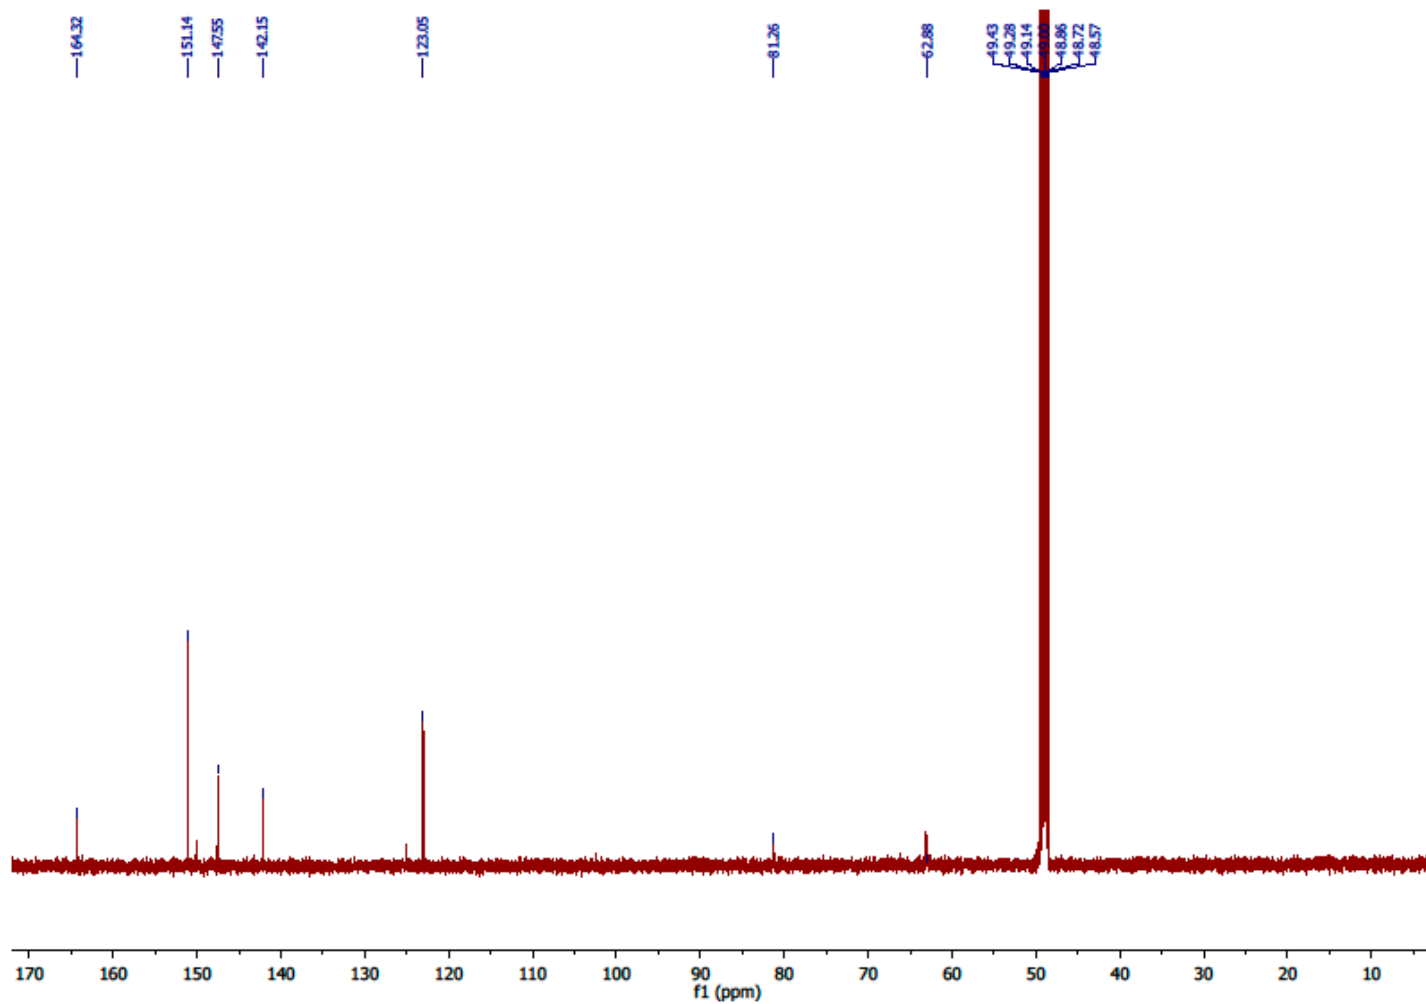

Figure S31. <sup>13</sup>C NMR spectrum of compound 15.

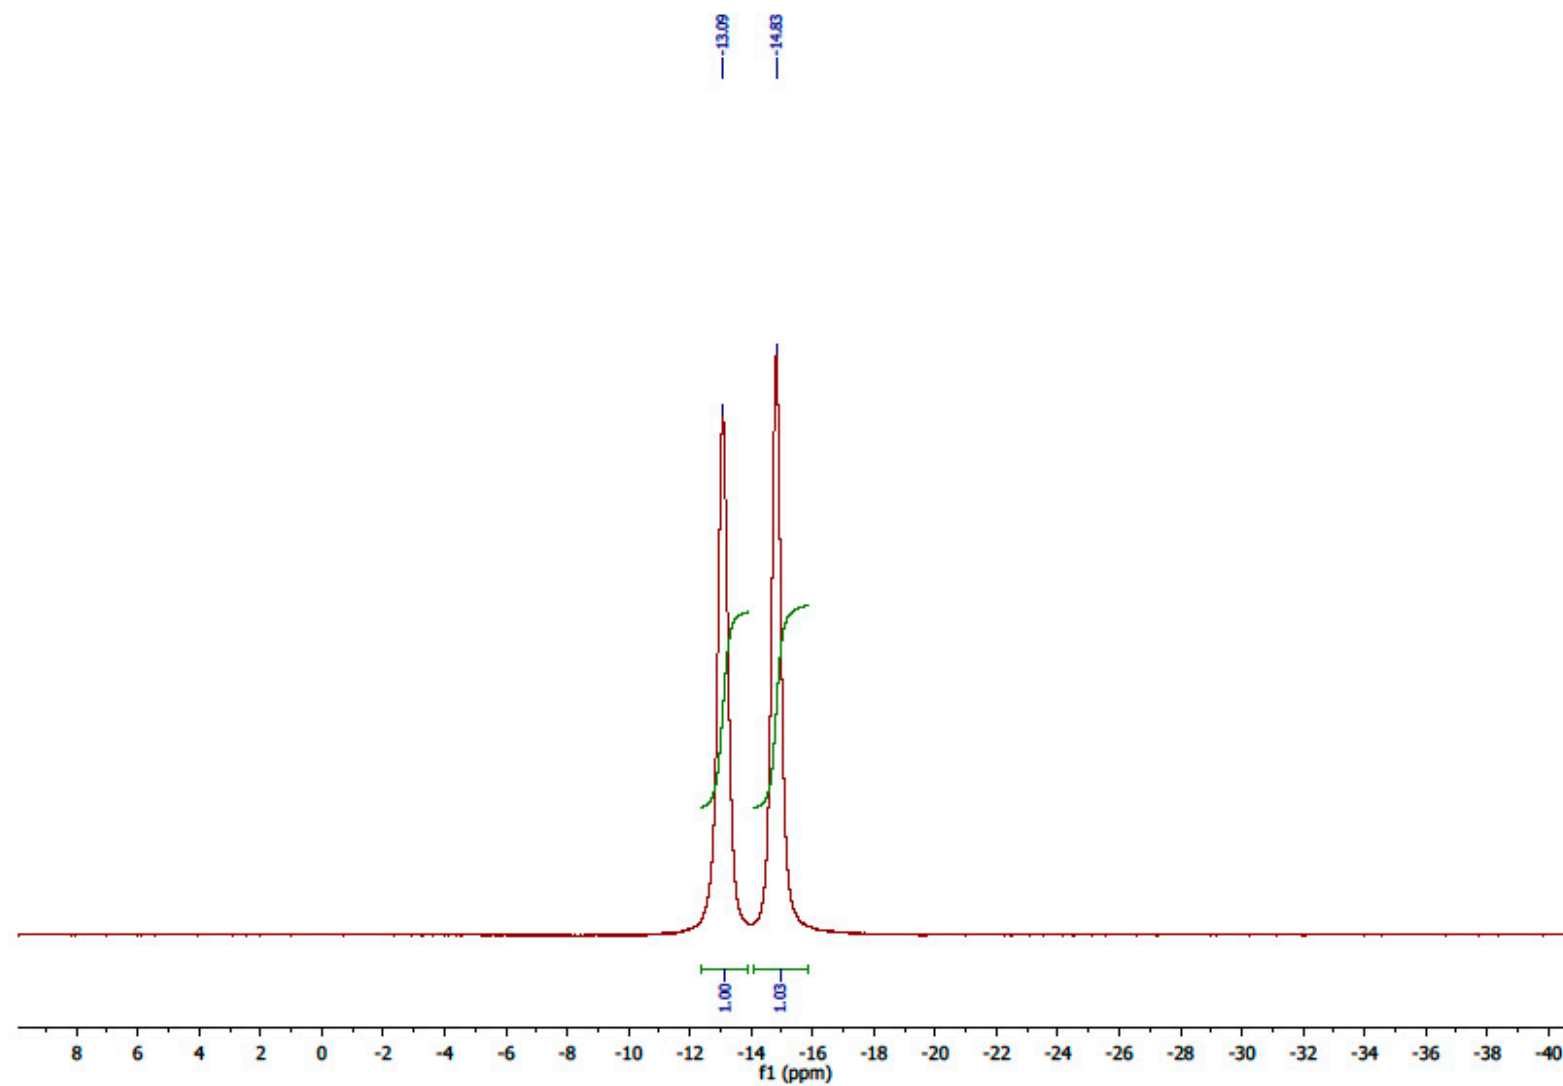

**Figure S32.**  $^{11}\text{B}$  NMR  $\{^1\text{H BB}\}$  spectrum of compound 15.

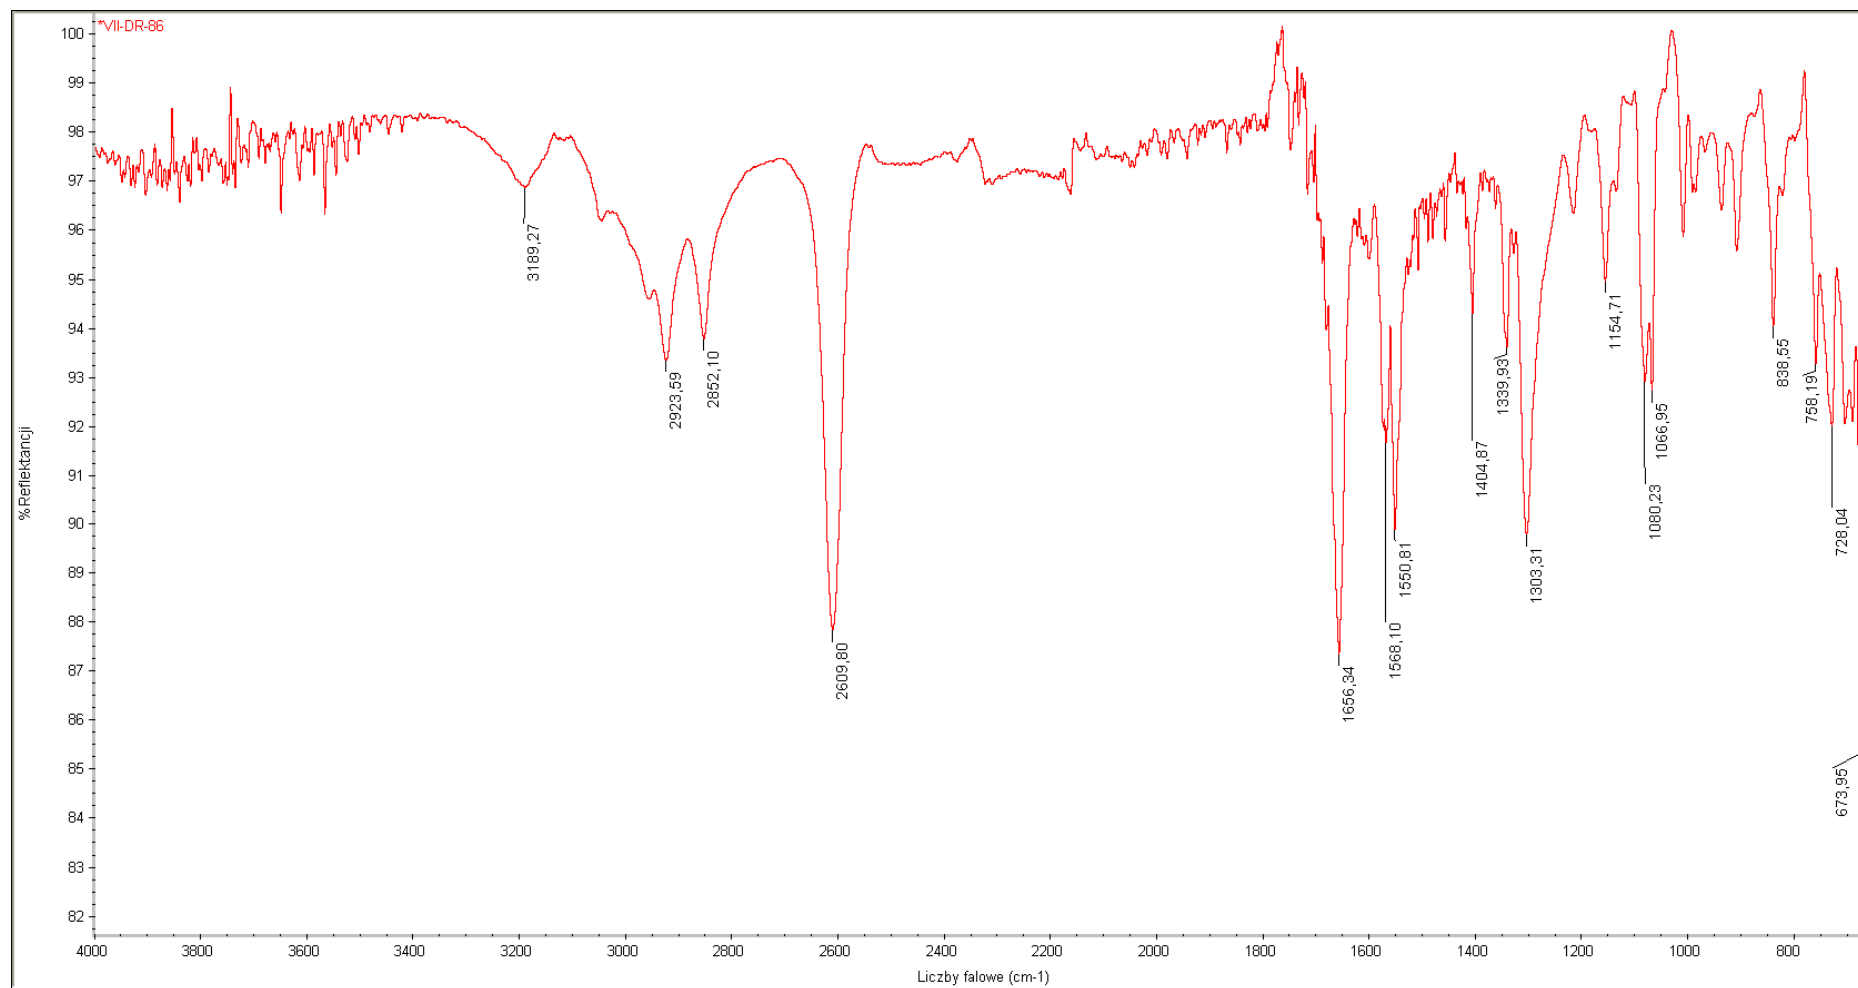

**Figure S33.** IR spectrum of compound **15**.

Spectrum Name: VII-DR-86\_typ\_dod  
Start Ion: 100  
End Ion: 500  
Source: APCI + 10.0μA 400C  
Capillary: 150V 300C Offset: 25V Span: 0V

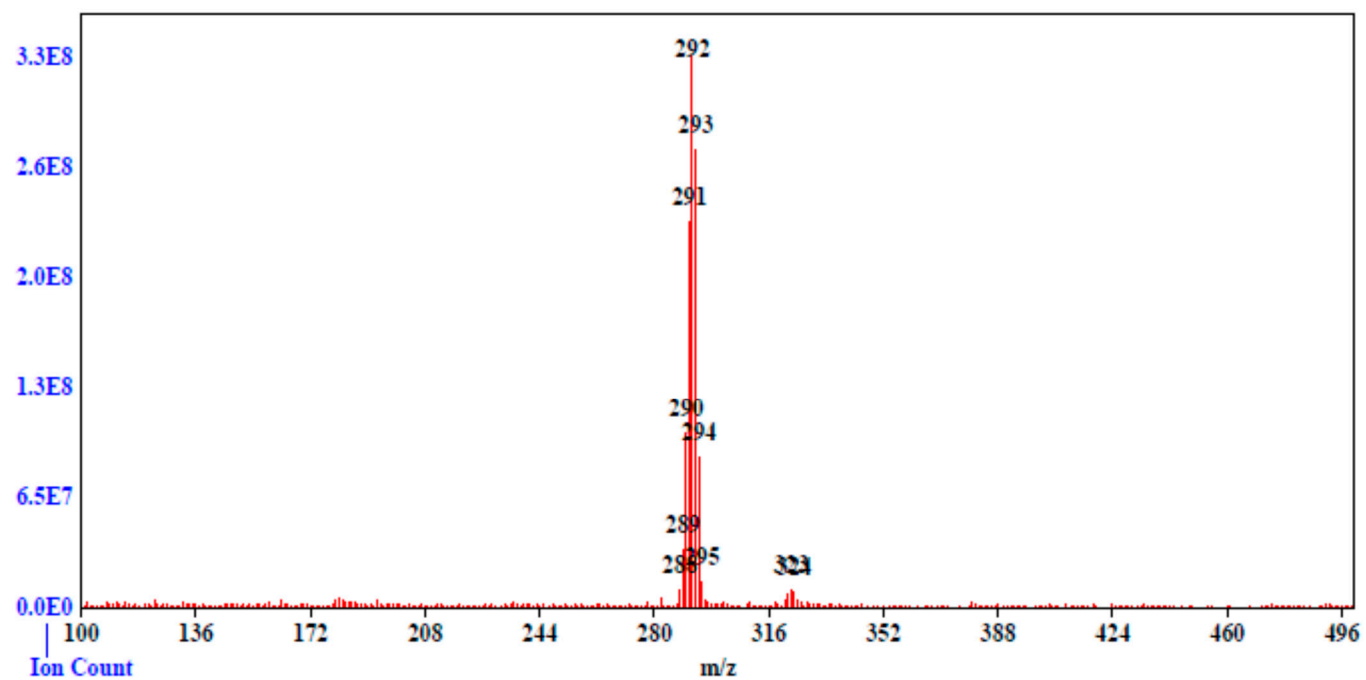

Figure S34. MS spectrum of compound 15.

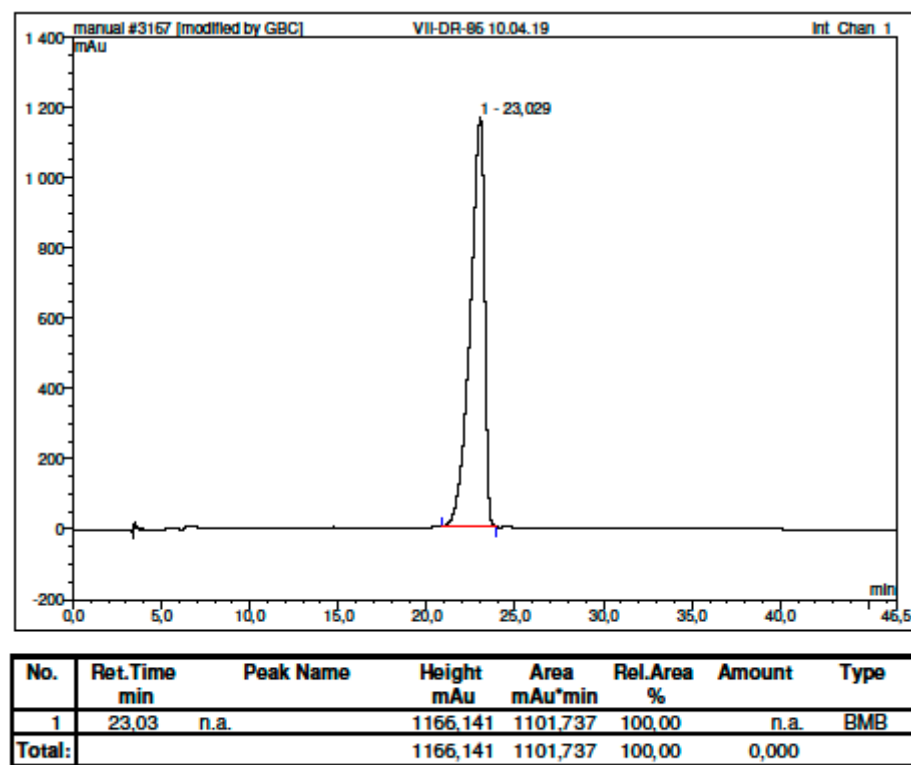

Figure S35. HPLC analysis of compound 15.

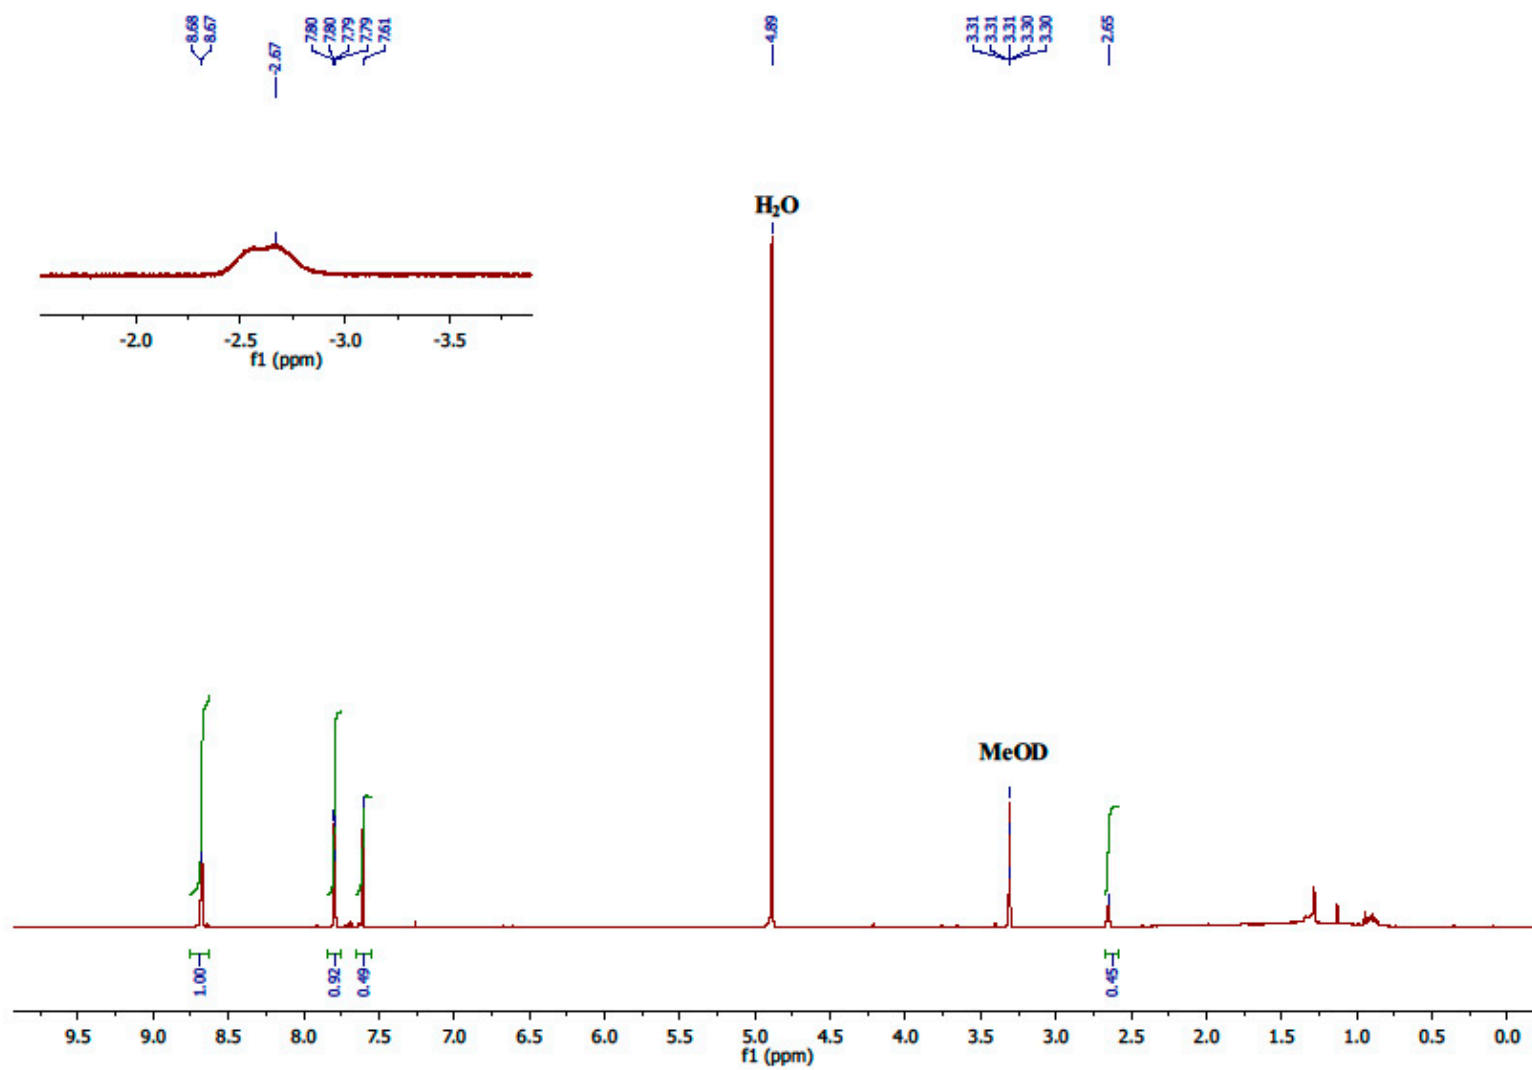

Figure S36. <sup>1</sup>H NMR spectrum of compound 16.

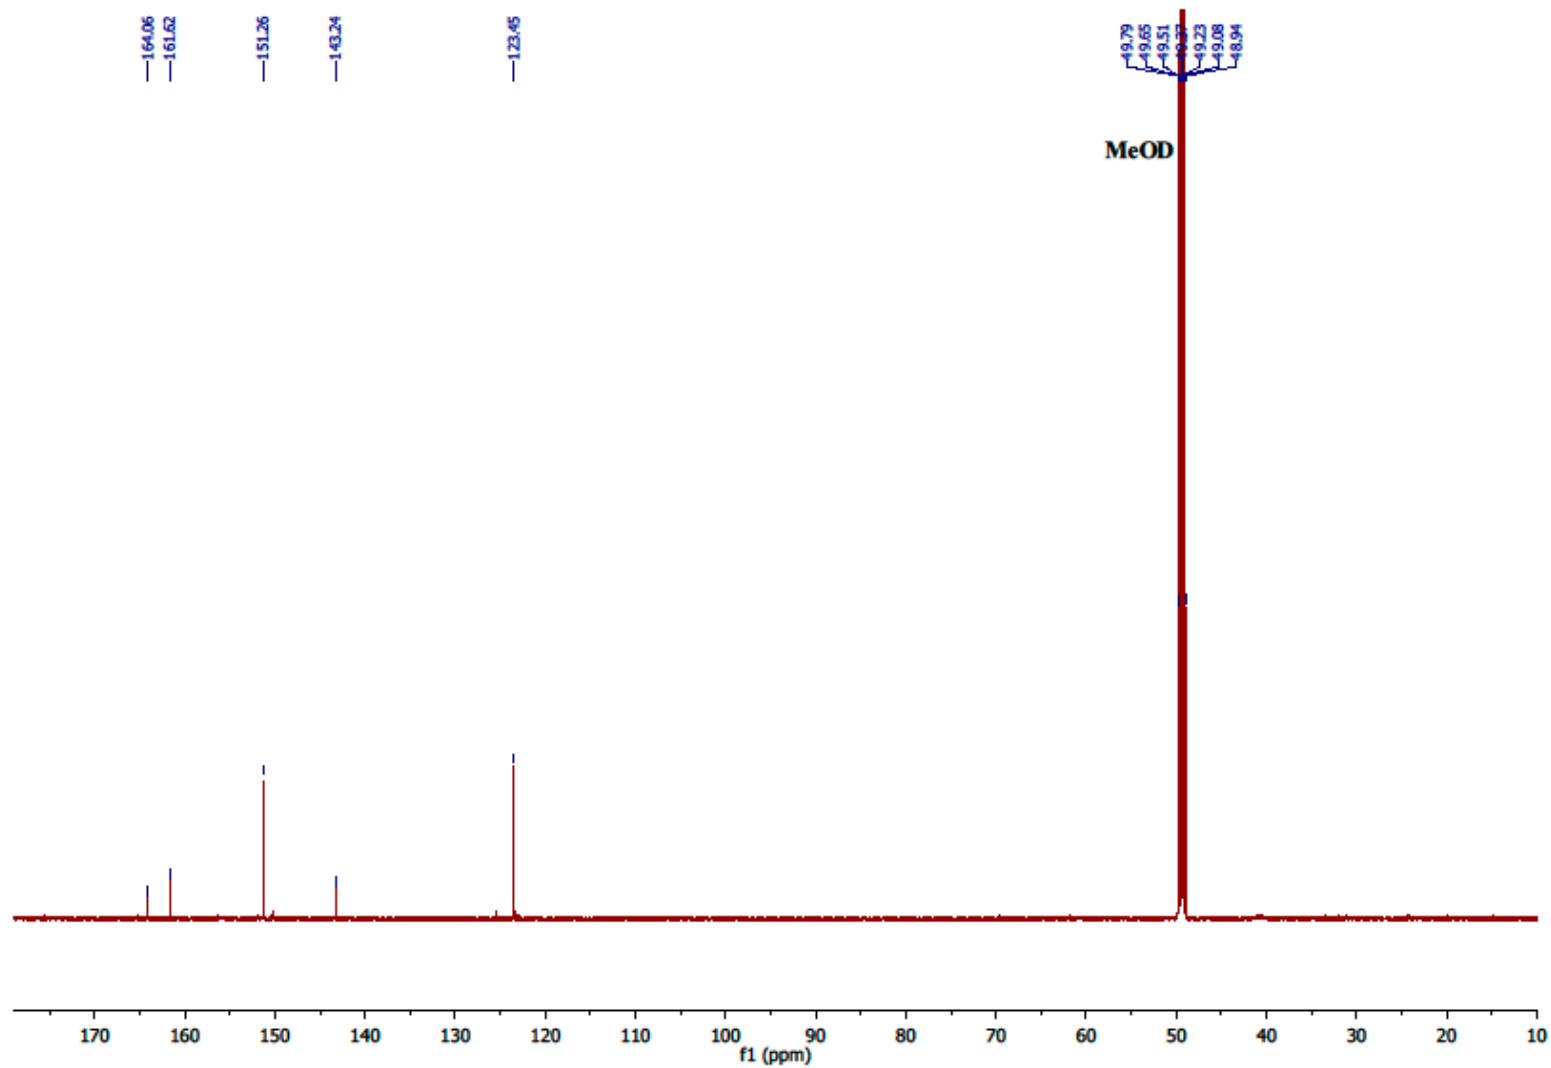

Figure S37.  $^{13}\text{C}$  NMR spectrum of compound **16**.



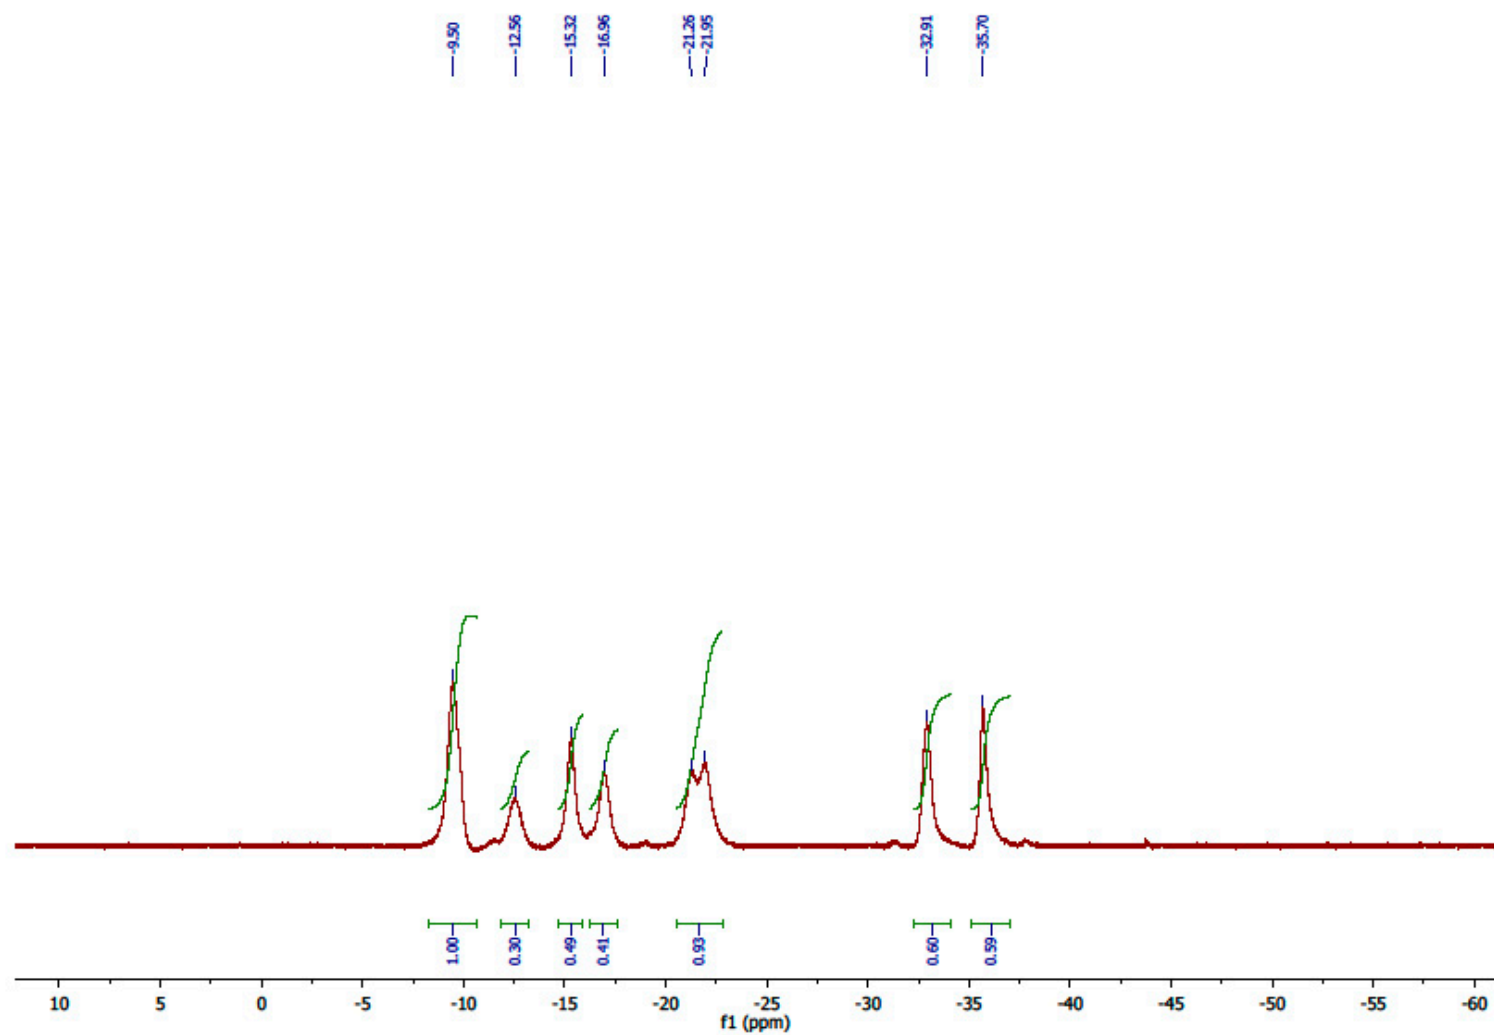

Figure S38.  $^{11}\text{B}$  NMR  $\{^1\text{H BB}\}$  spectrum of compound 16.

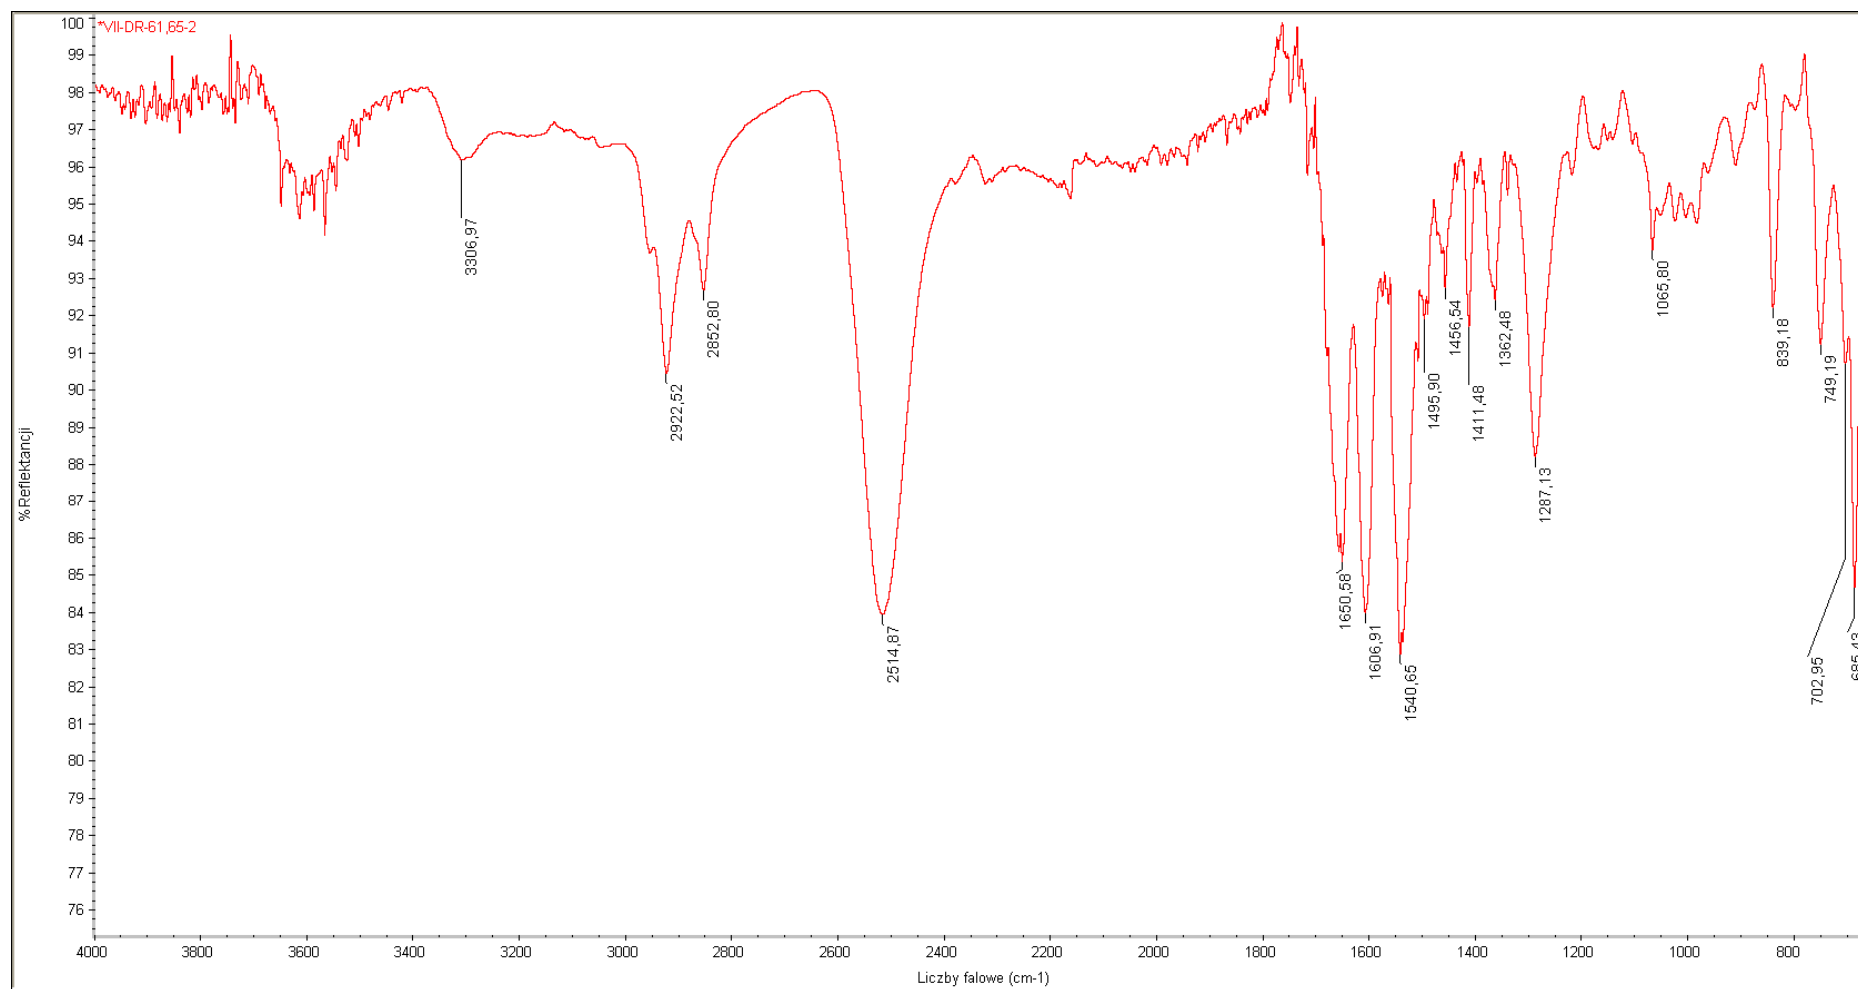

Figure S39. IR spectrum of compound 16.

Spectrum Name: VII-DR-46\_fr3\_rob\_min  
Start Ion: 100  
End Ion: 400  
Source: ESI - 2.5kV 350C  
Capillary: 180V 300C Offset: 30V Span: 20V

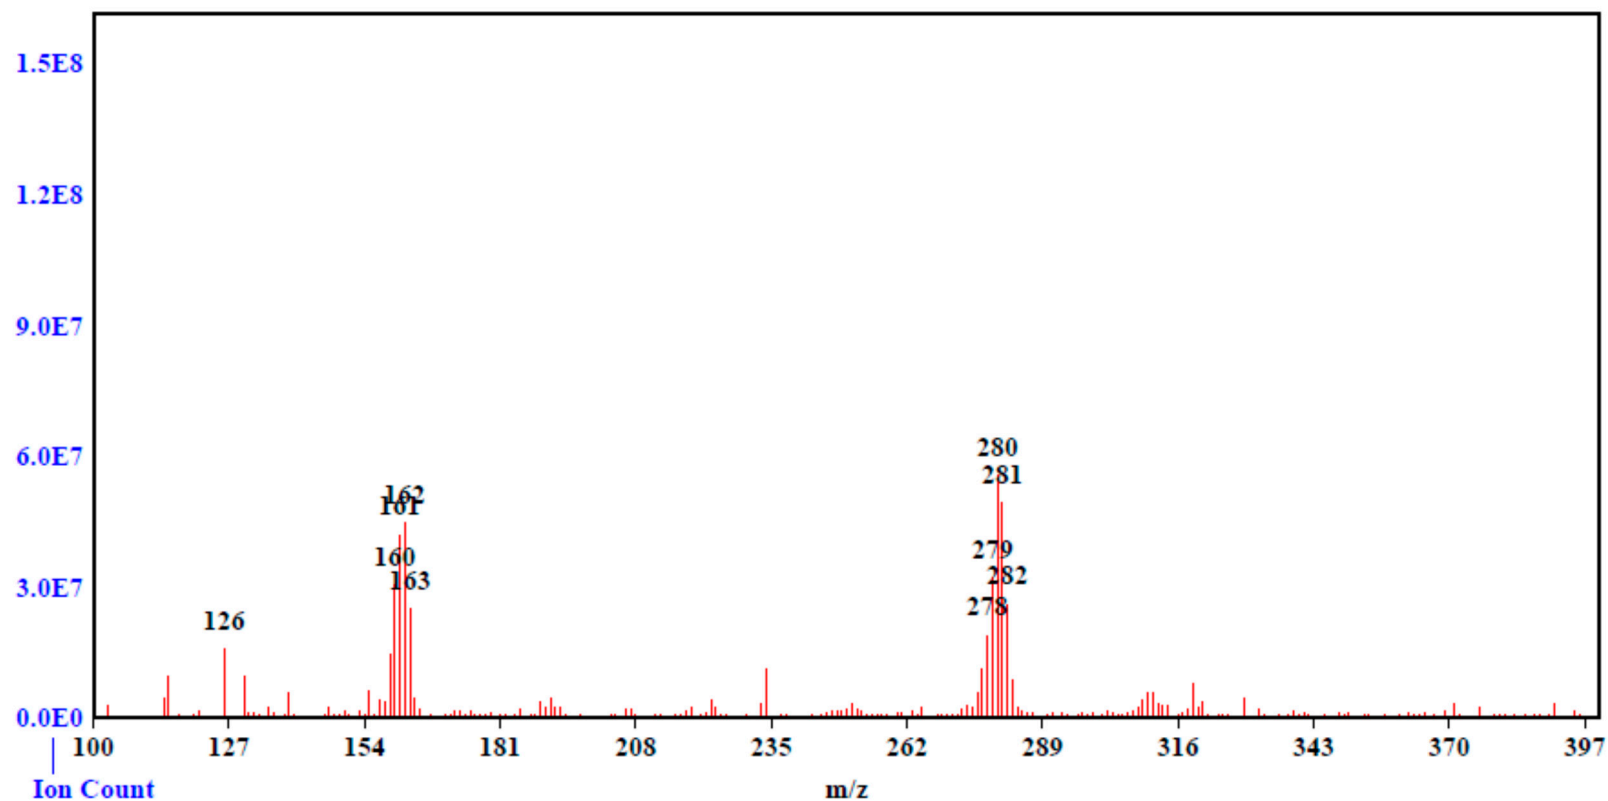

Figure S40. MS spectrum of compound 16.

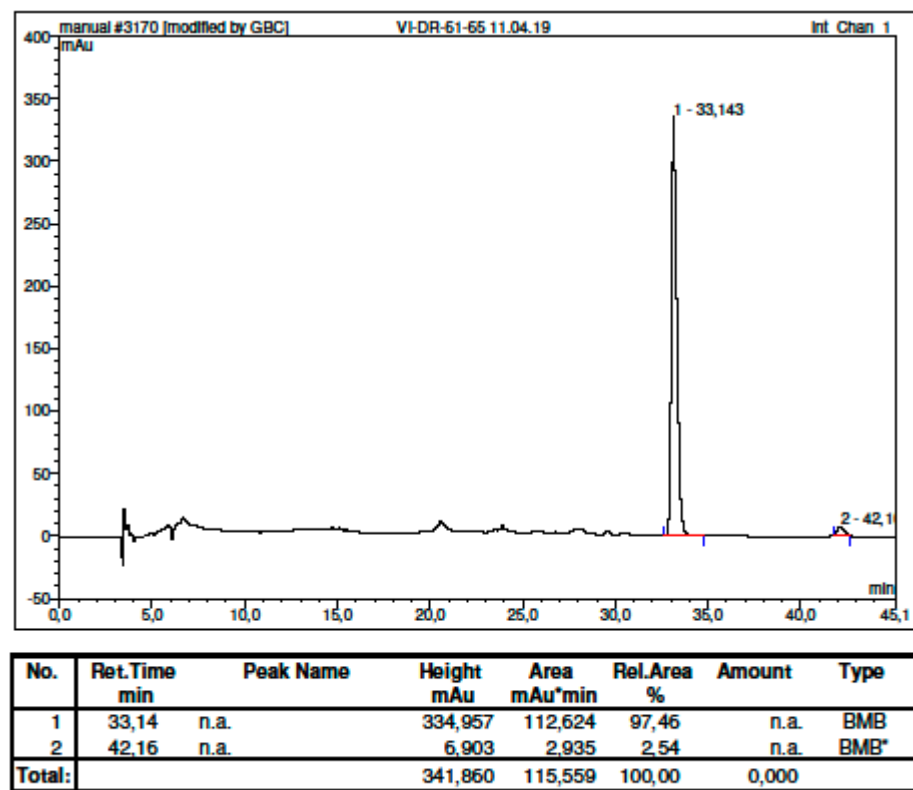

Figure S41. HPLC analysis of compound 16.

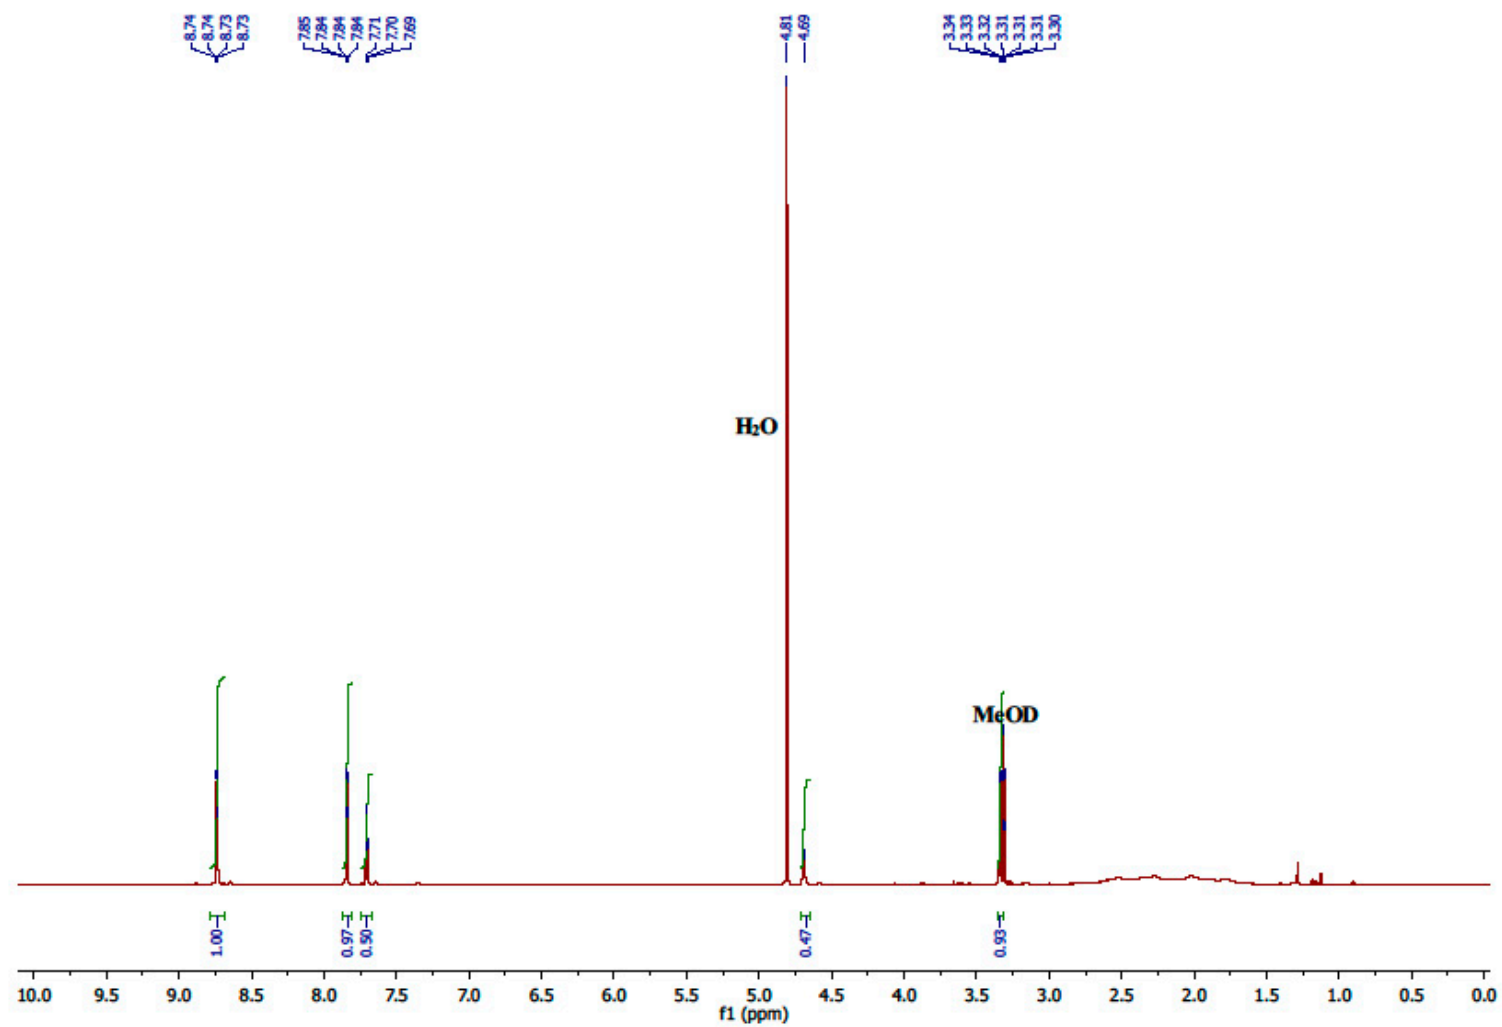

Figure S42. <sup>1</sup>H NMR spectrum of compound 20.

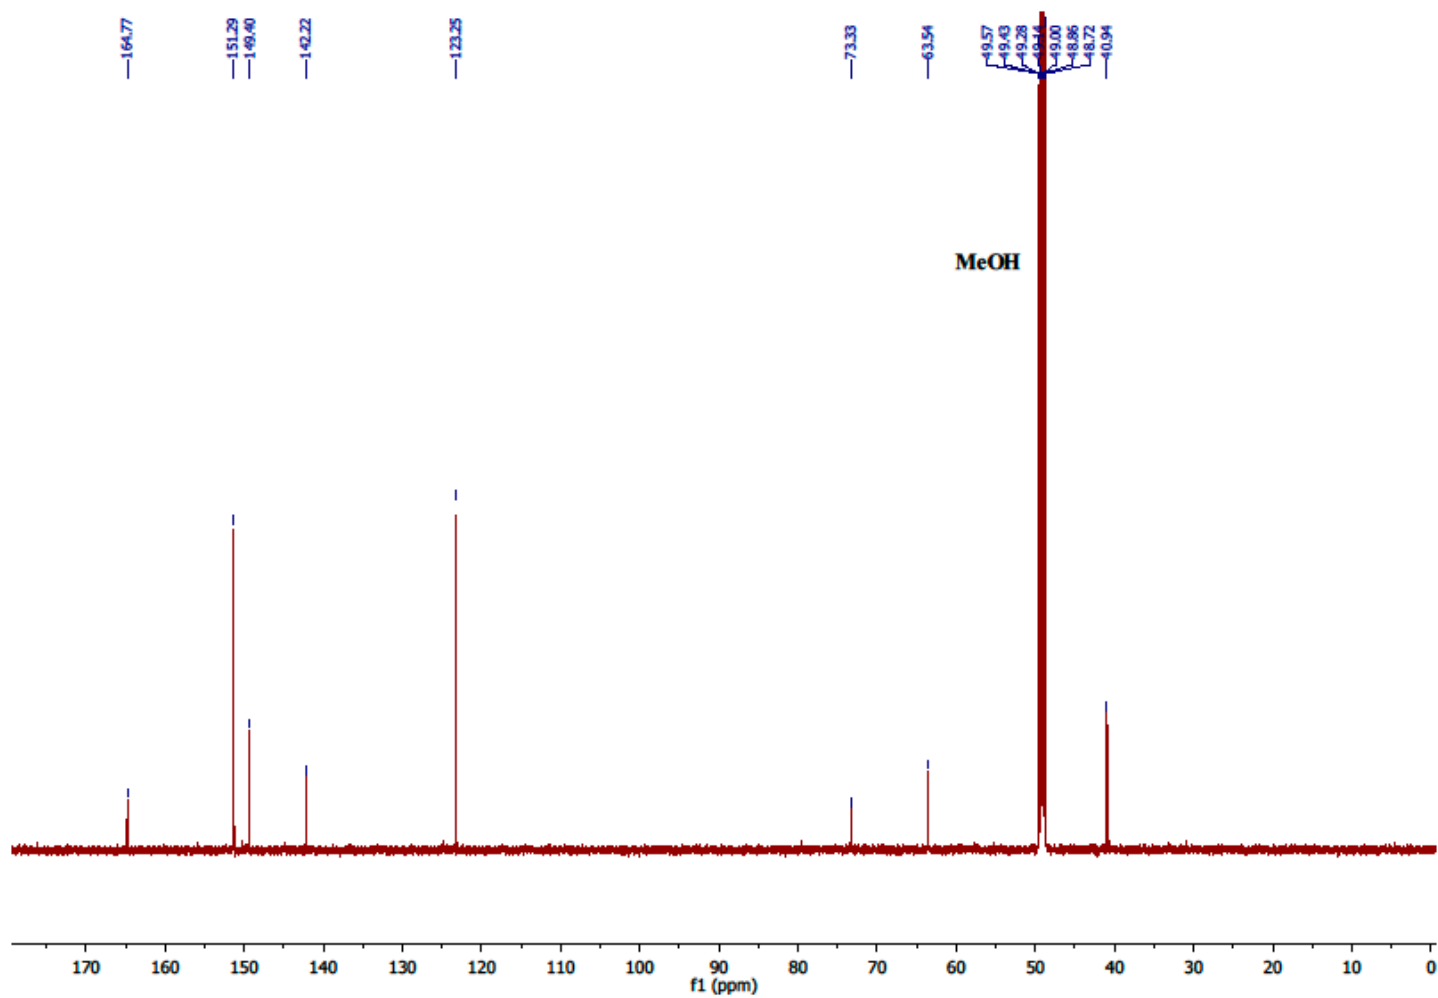

Figure S43. <sup>13</sup>C NMR spectrum of compound 20.

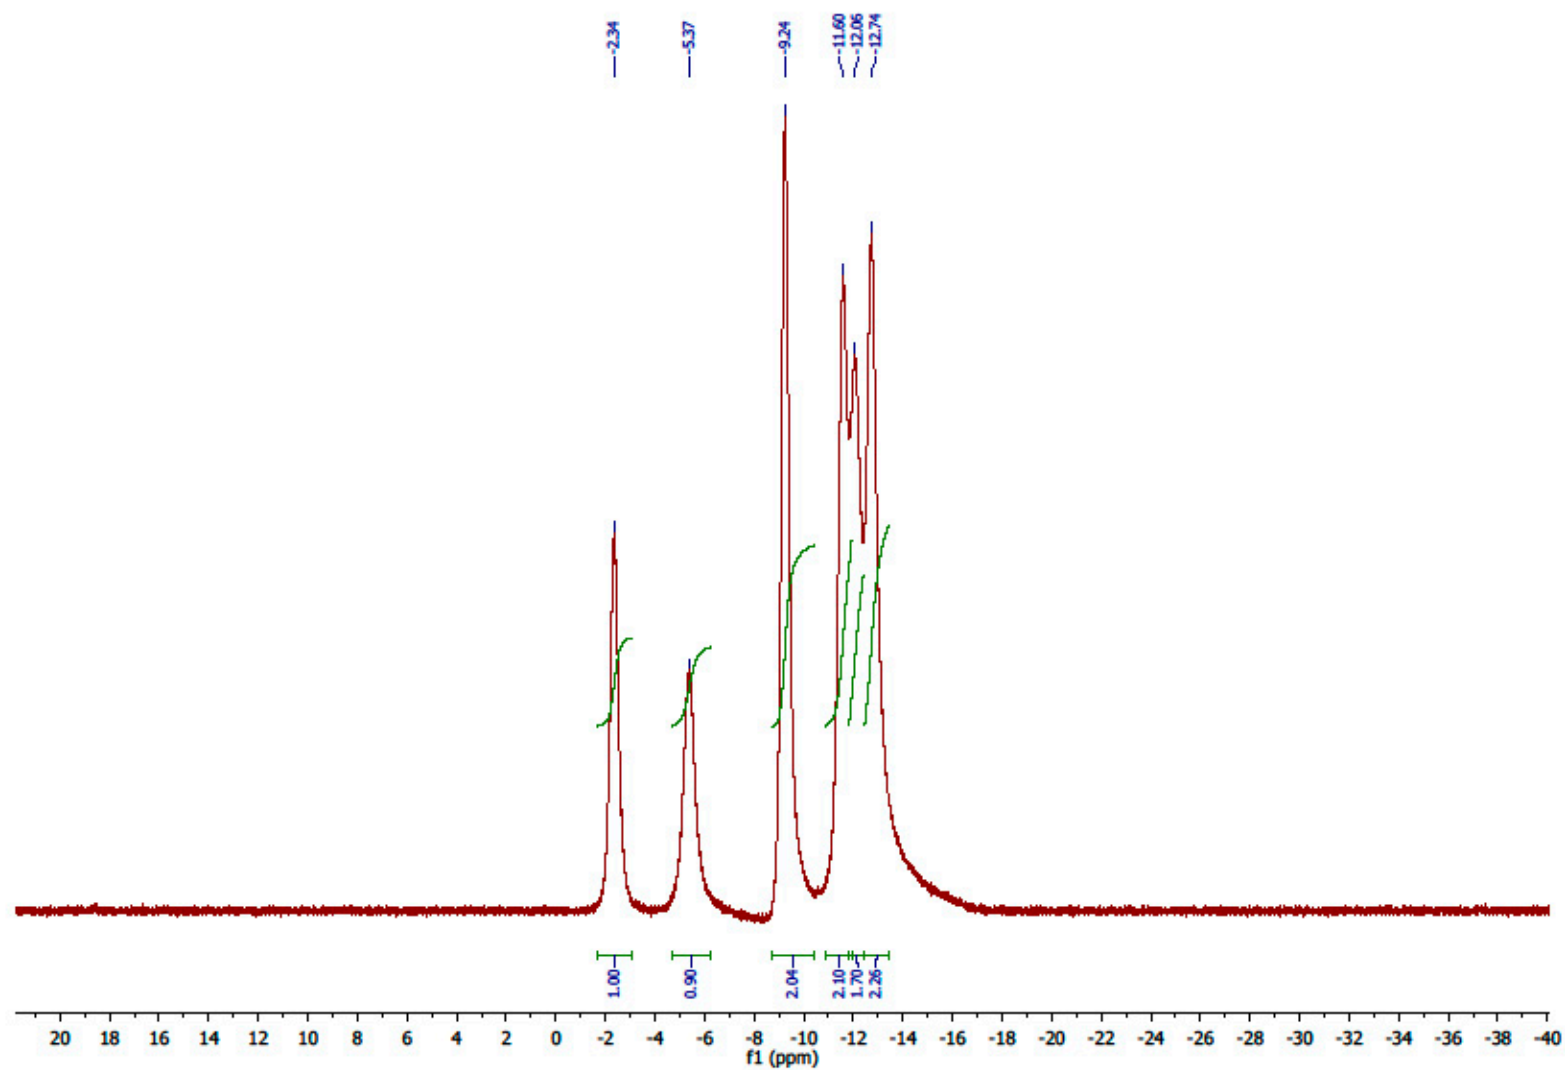

Figure S44.  $^1\text{H}$  B NMR  $\{^1\text{H BB}\}$  spectrum of compound 20.

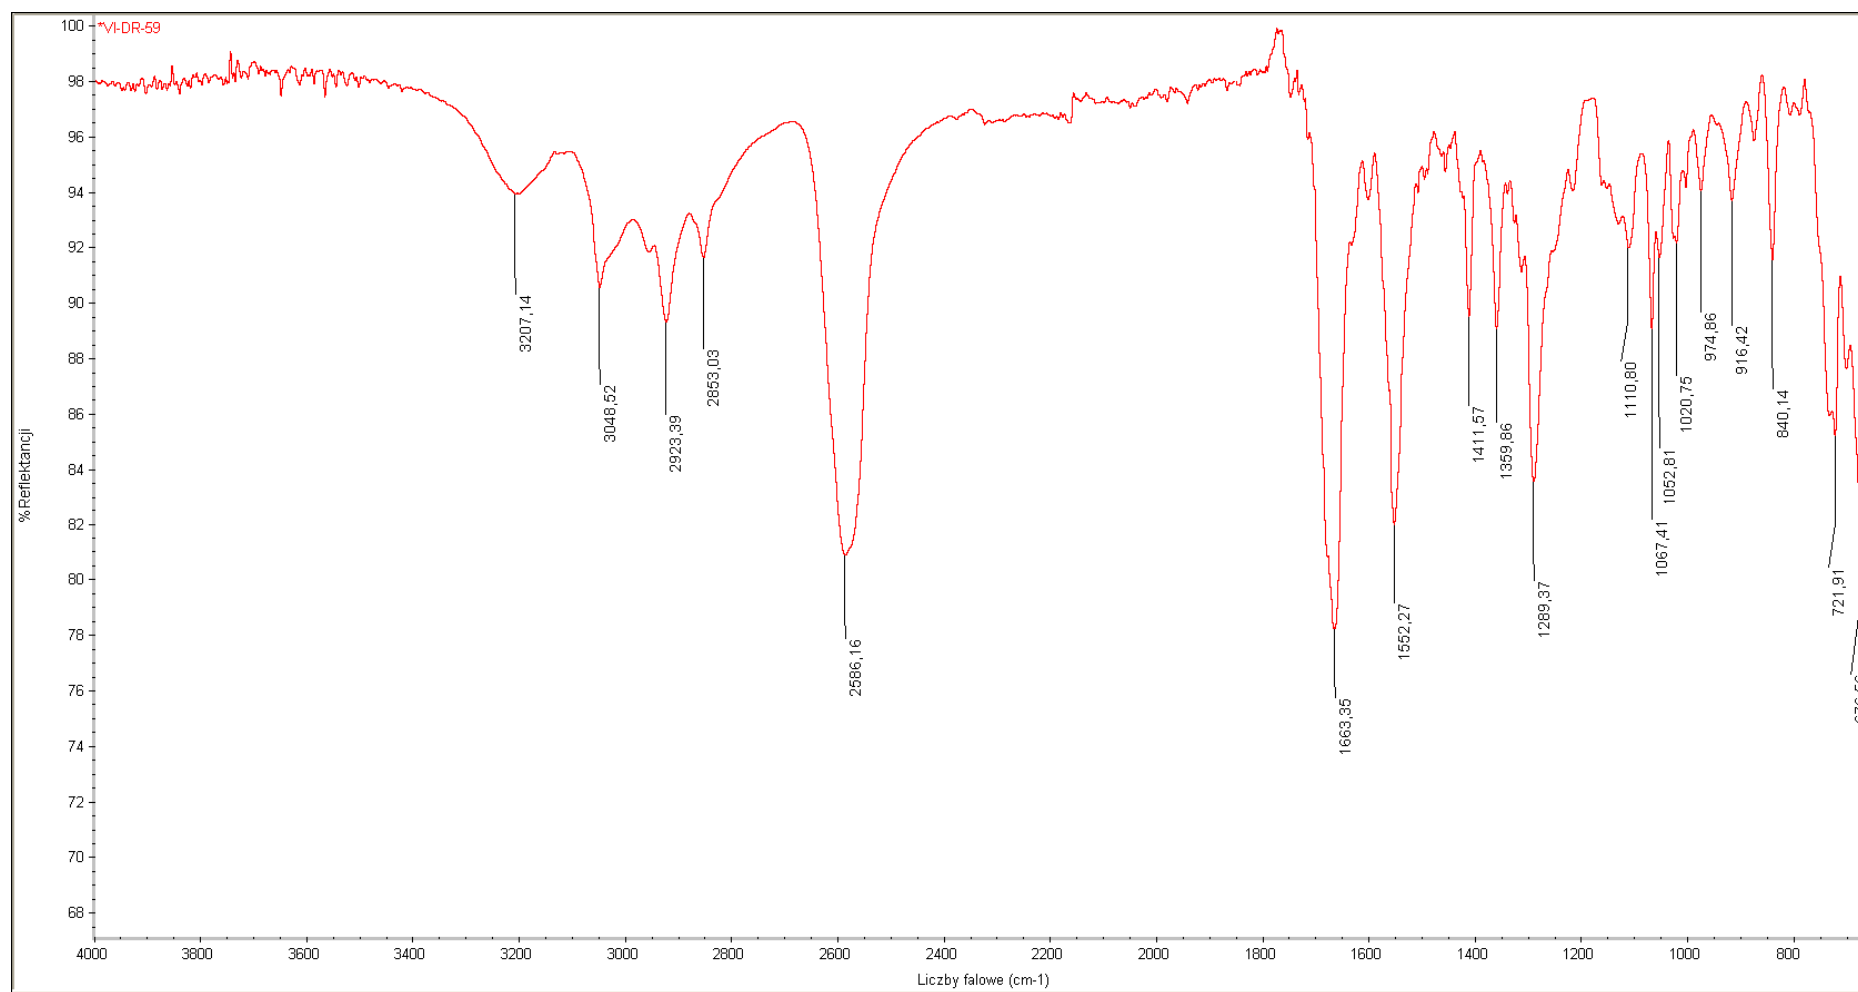

**Figure S45.** IR spectrum of compound 20.



Spectrum Name: VI-DR-59\_frg\_dod2  
Start Ion: 100  
End Ion: 500  
Source: APCI + 10.0  $\mu$ A 250C  
Capillary: 150V 200C Offset: 15V Span: 0V

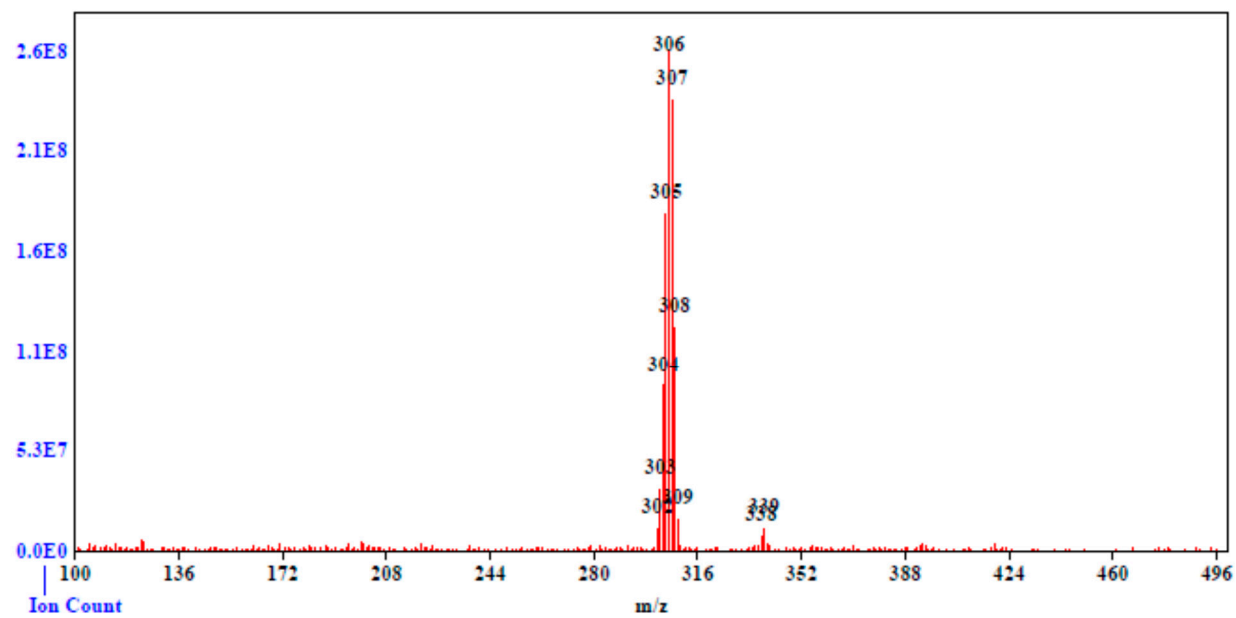

Figure S46. MS spectrum of compound 20.

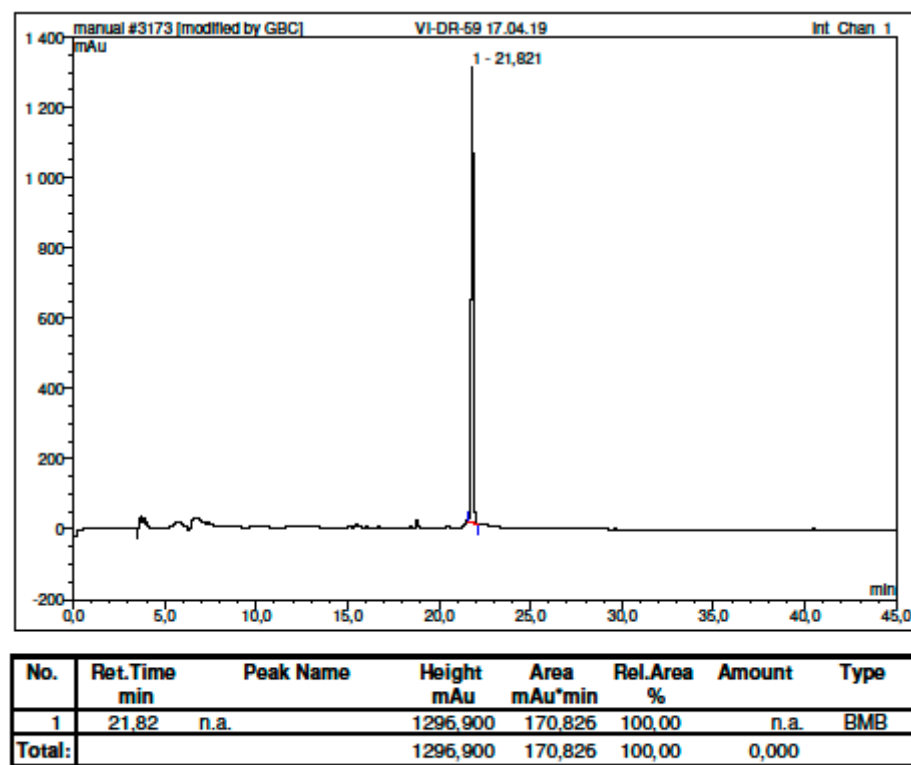

Figure S47. HPLC analysis of compound 20.

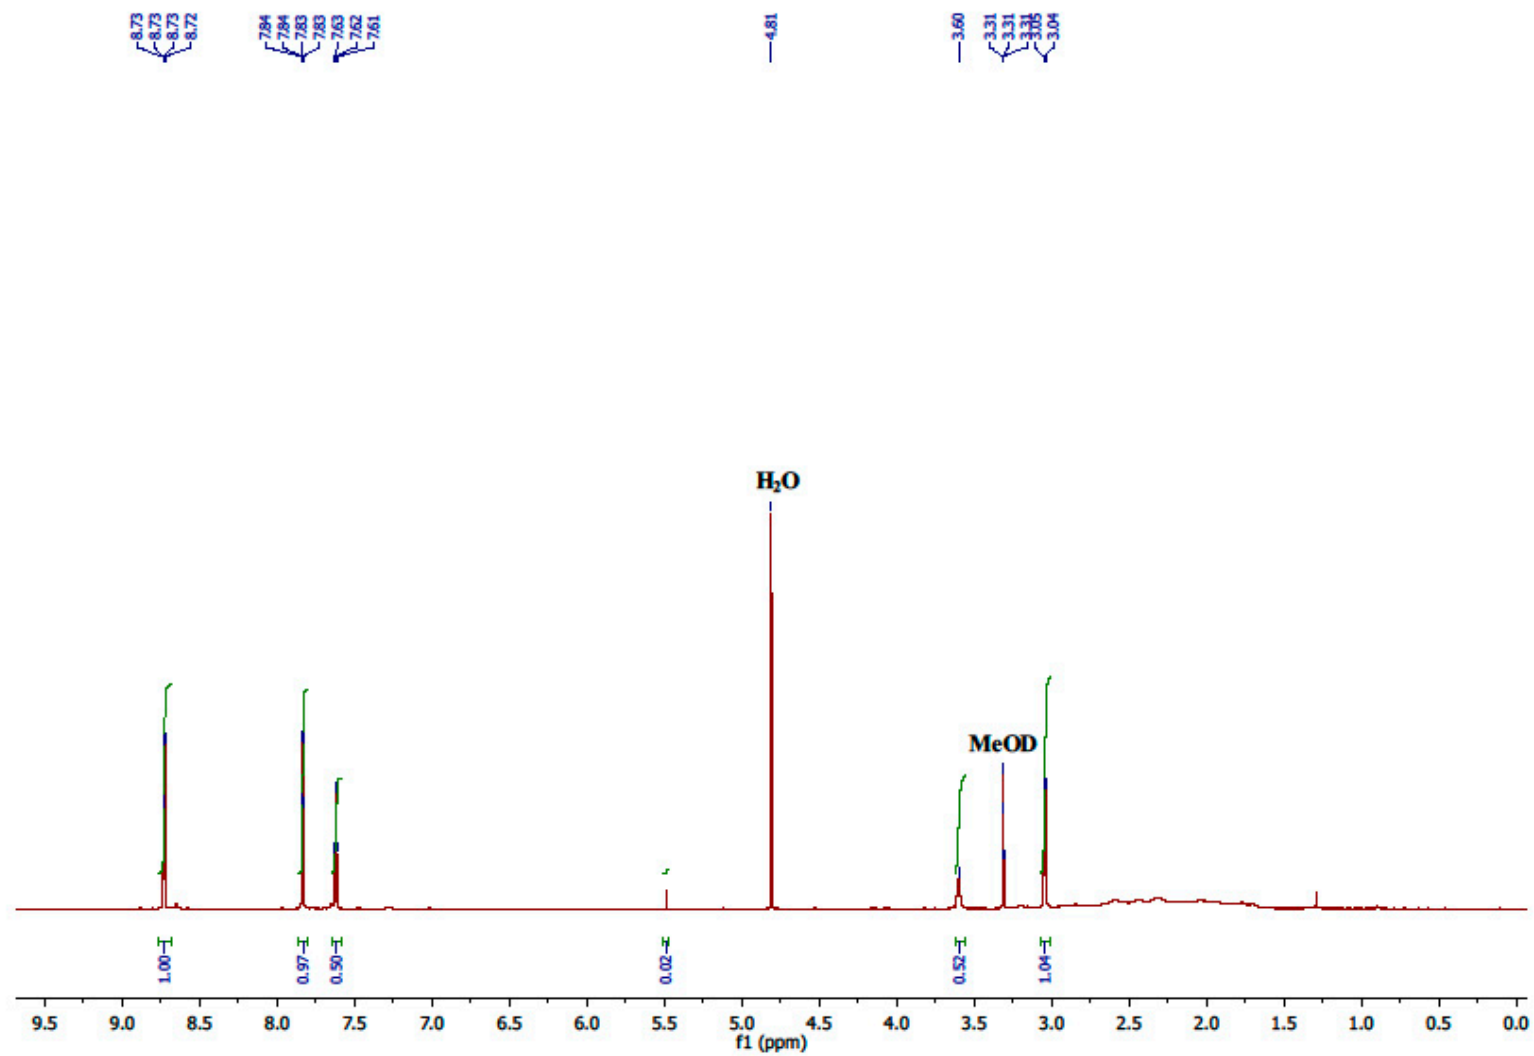

Figure S48. <sup>1</sup>H NMR spectrum of compound 21.

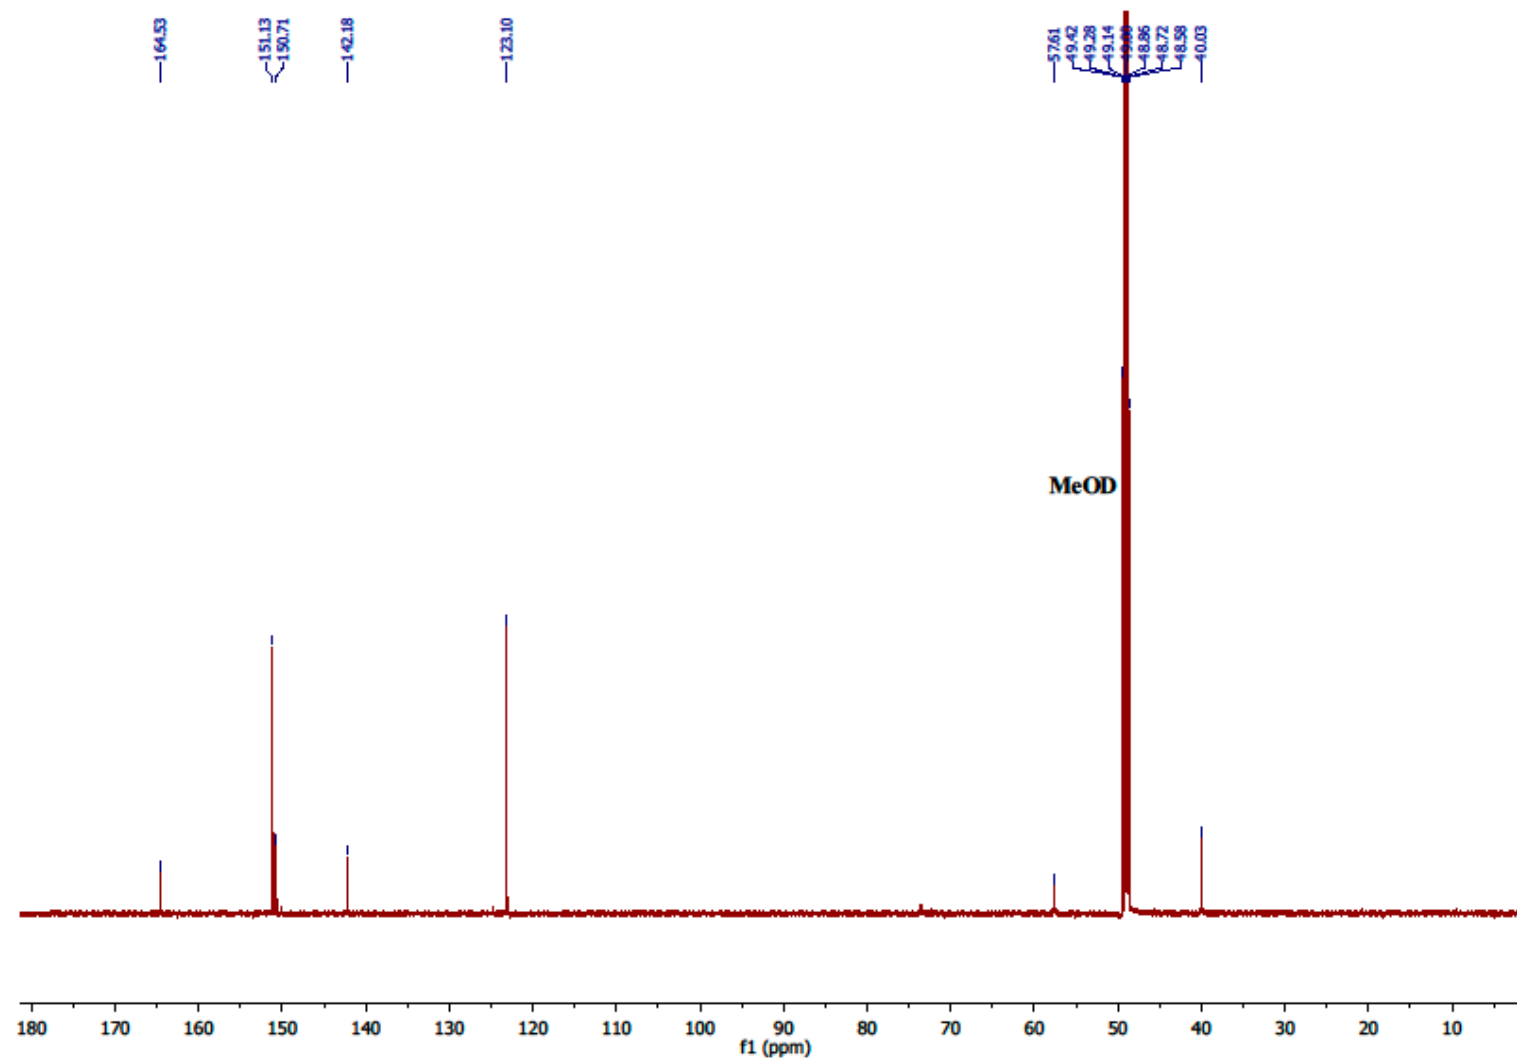

Figure S49. <sup>13</sup>C NMR spectrum of compound 21.

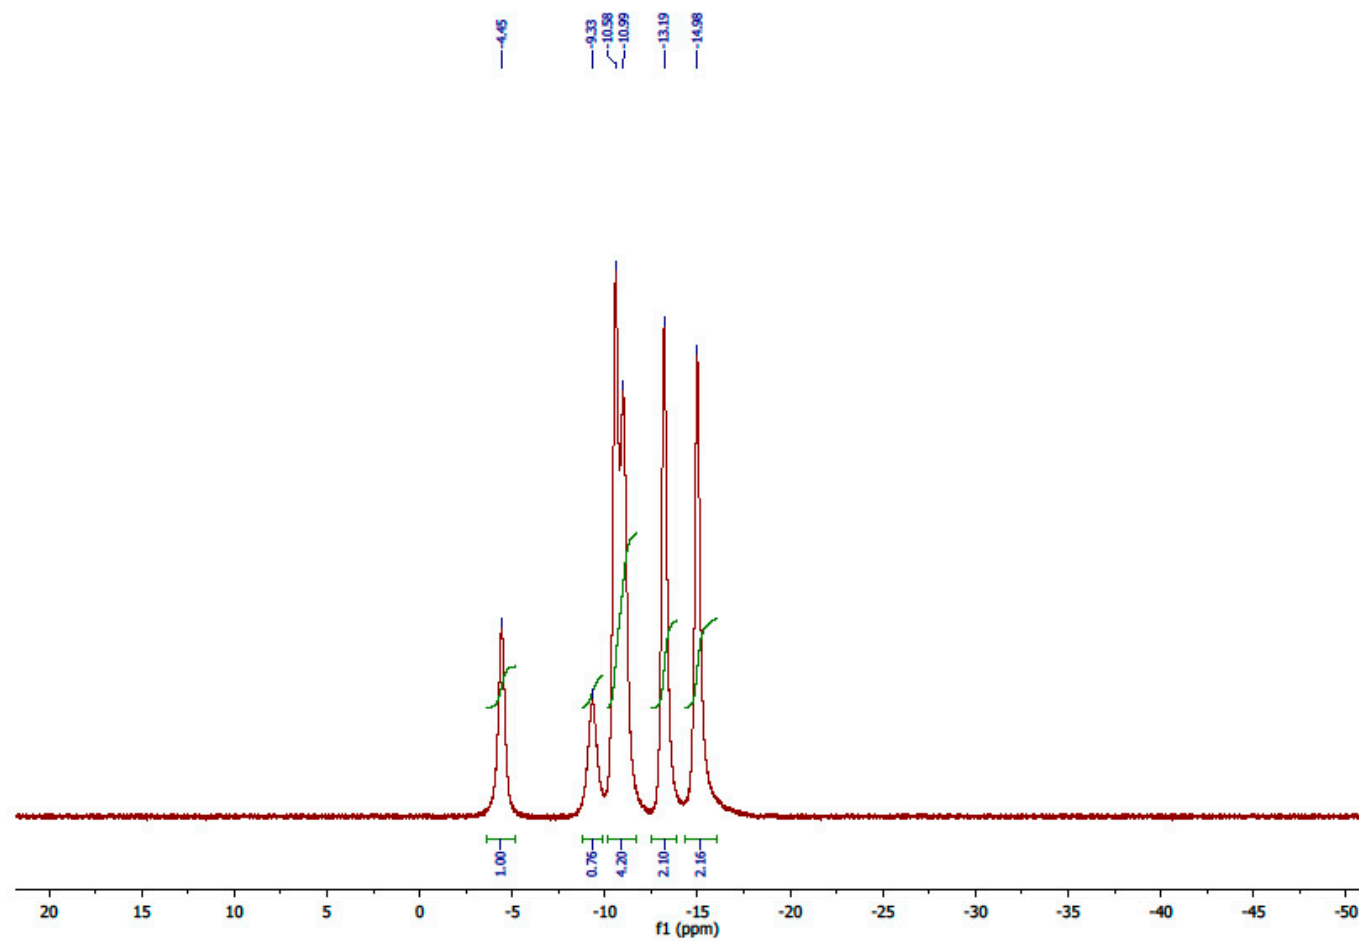

Figure S50.  $^{11}\text{B}$  NMR  $\{^1\text{H BB}\}$  spectrum of compound 21.

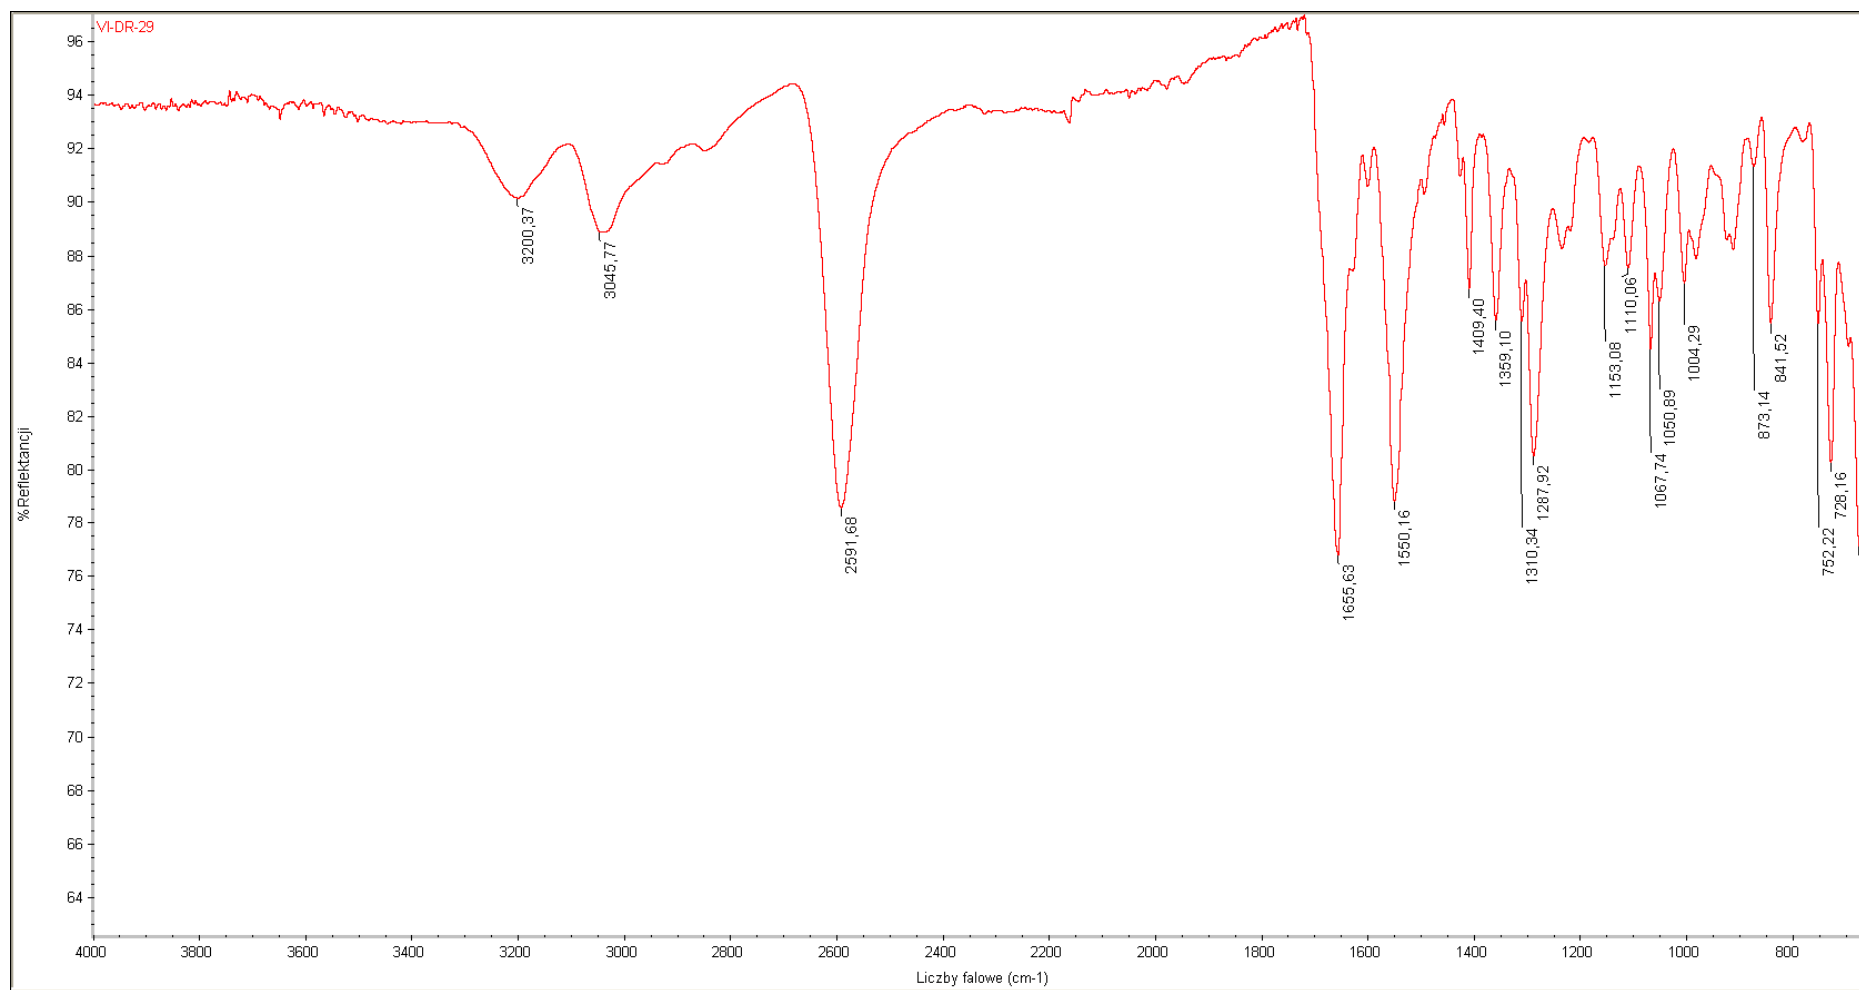

**Figure S51.** IR spectrum of **21**.

Spectrum Name: VI-DR-29\_frg\_dod  
Start Ion: 200  
End Ion: 500  
Source: APCI + 10.0μA 250C  
Capillary: 150V 200C Offset: 15V Span: 0V

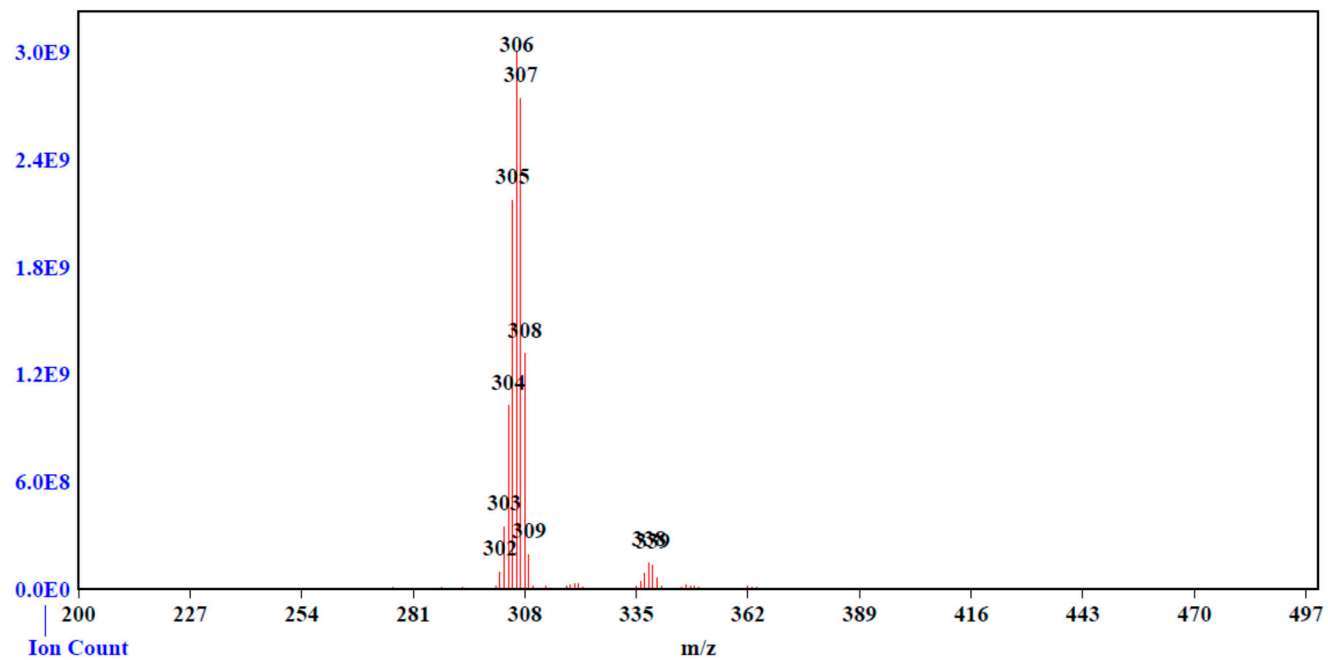

Figure S52. MS spectrum of compound 21.

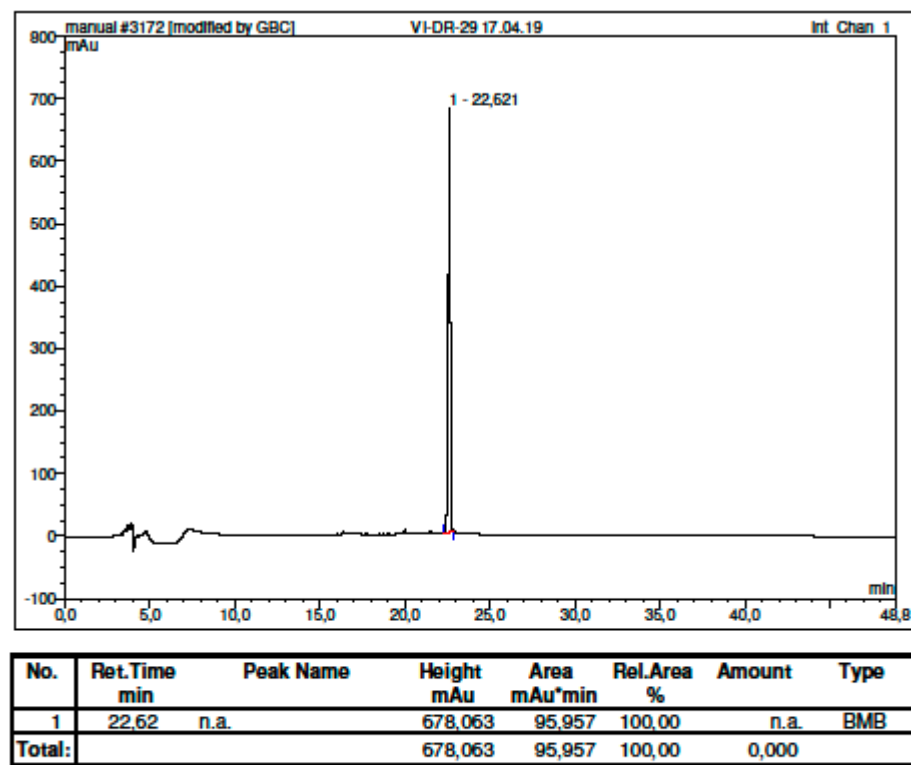

Figure S53. HPLC analysis of compound 21.



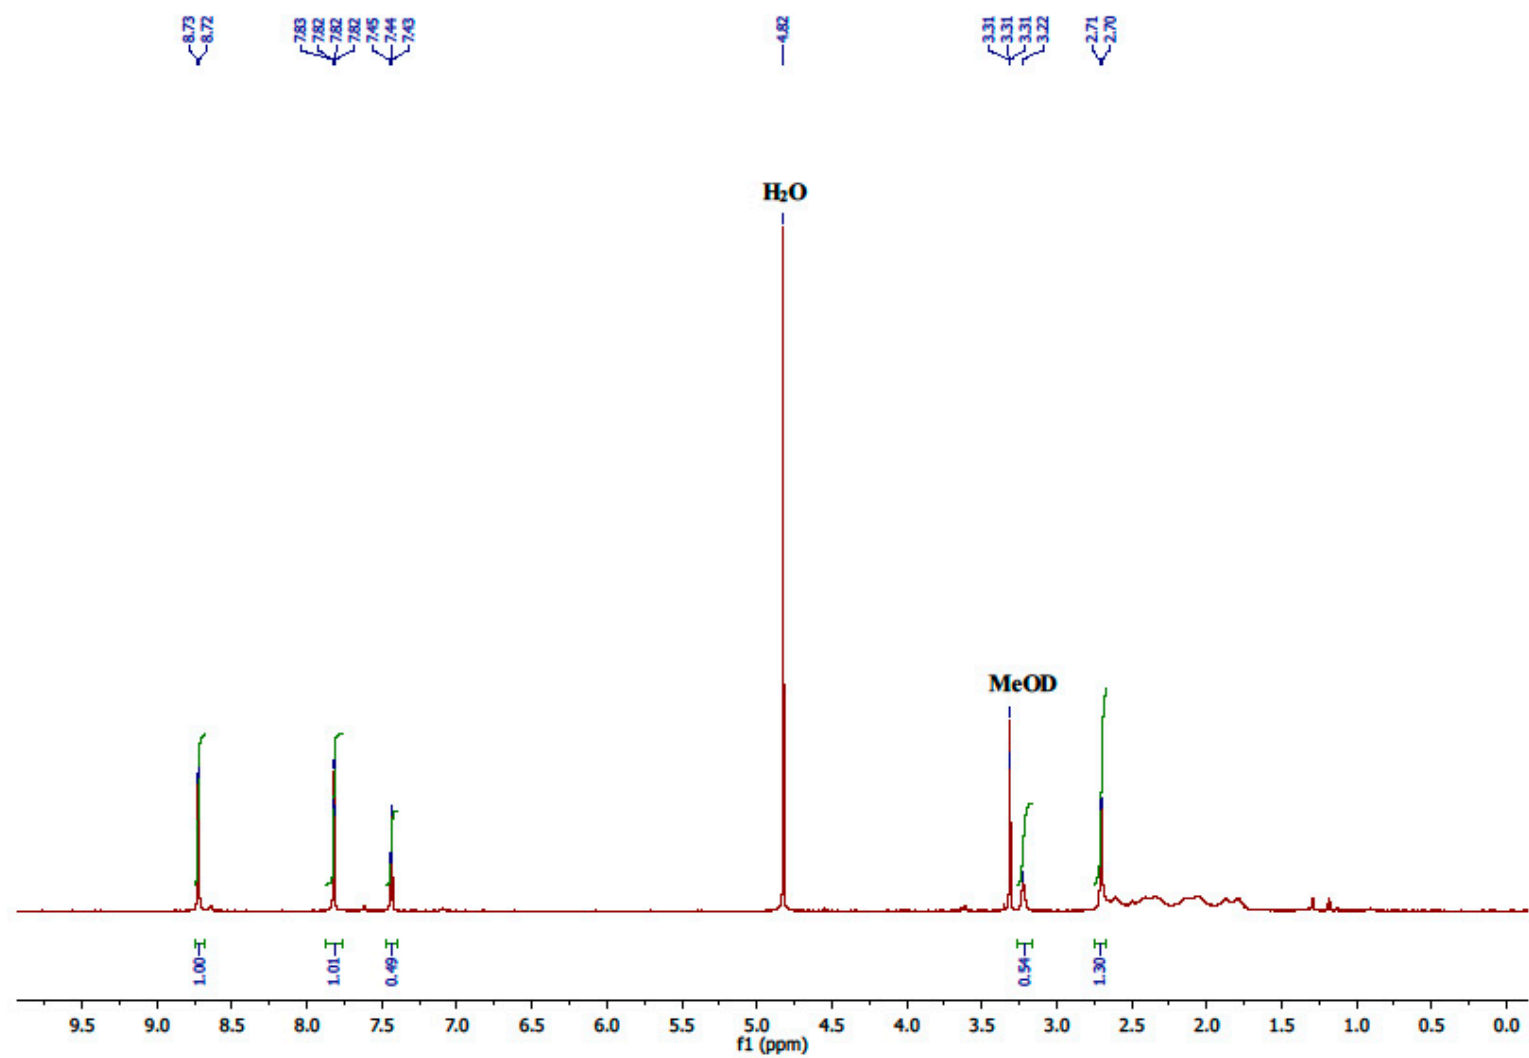

Figure S54. <sup>1</sup>H NMR spectrum of compound 22.

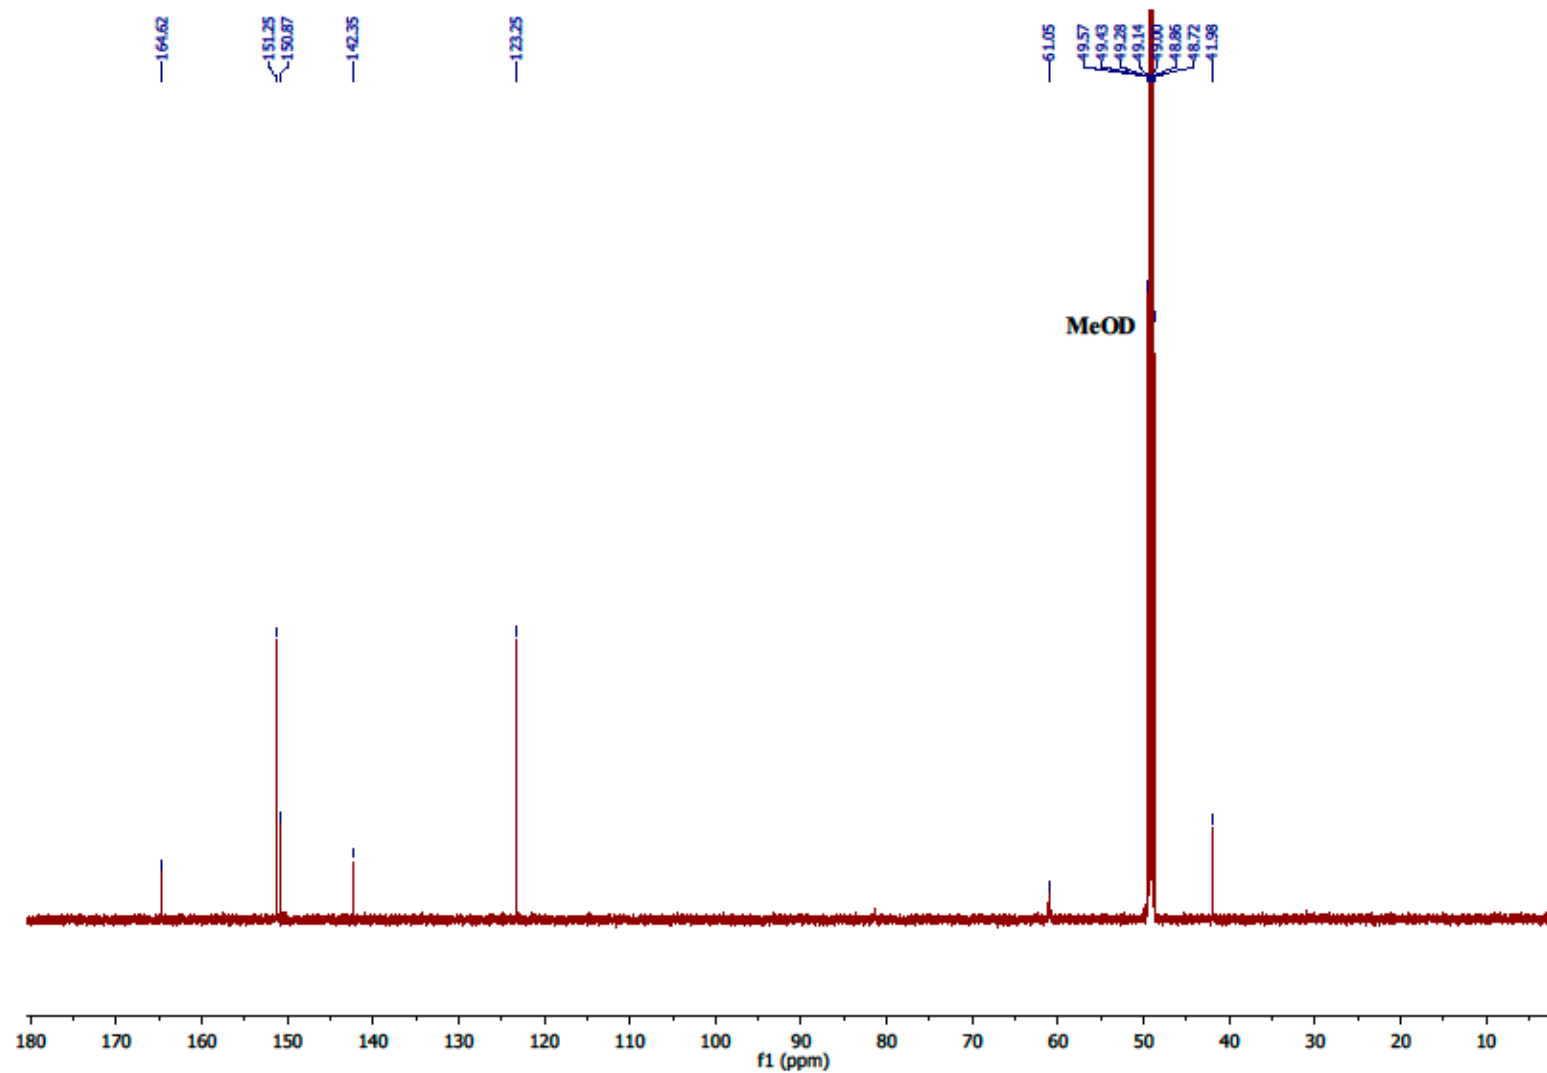

Figure S55. <sup>13</sup>C NMR spectrum of compound 22.

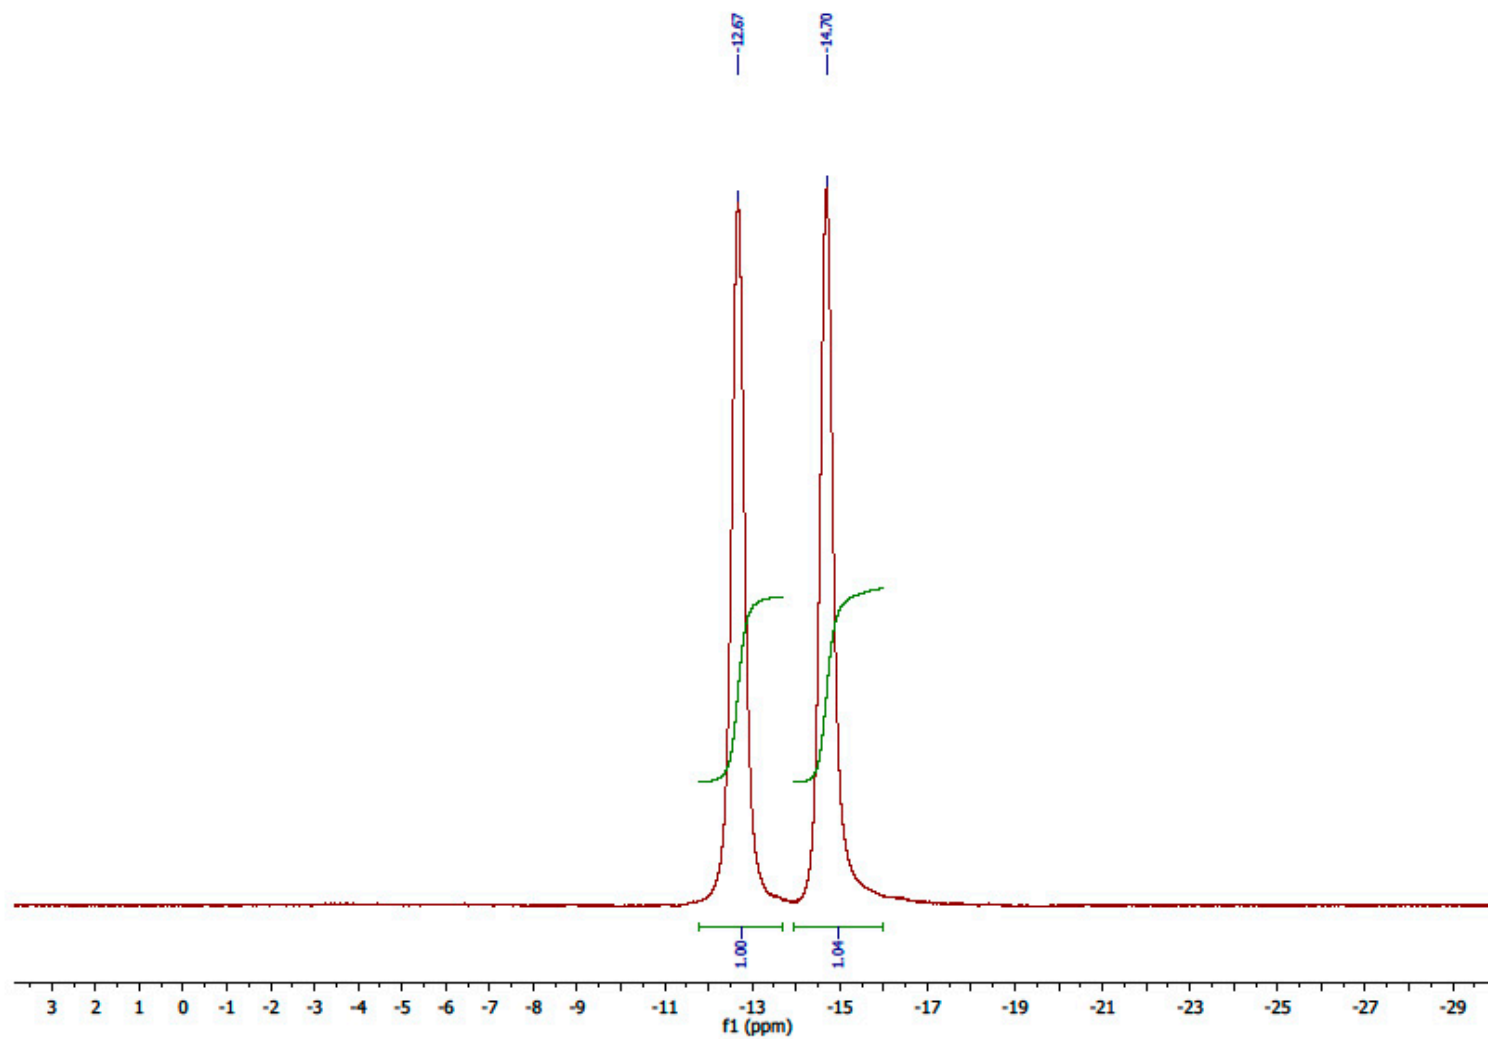

**Figure S56.**  $^{11}\text{B}$  NMR  $\{^1\text{H BB}\}$  spectrum of compound 22.

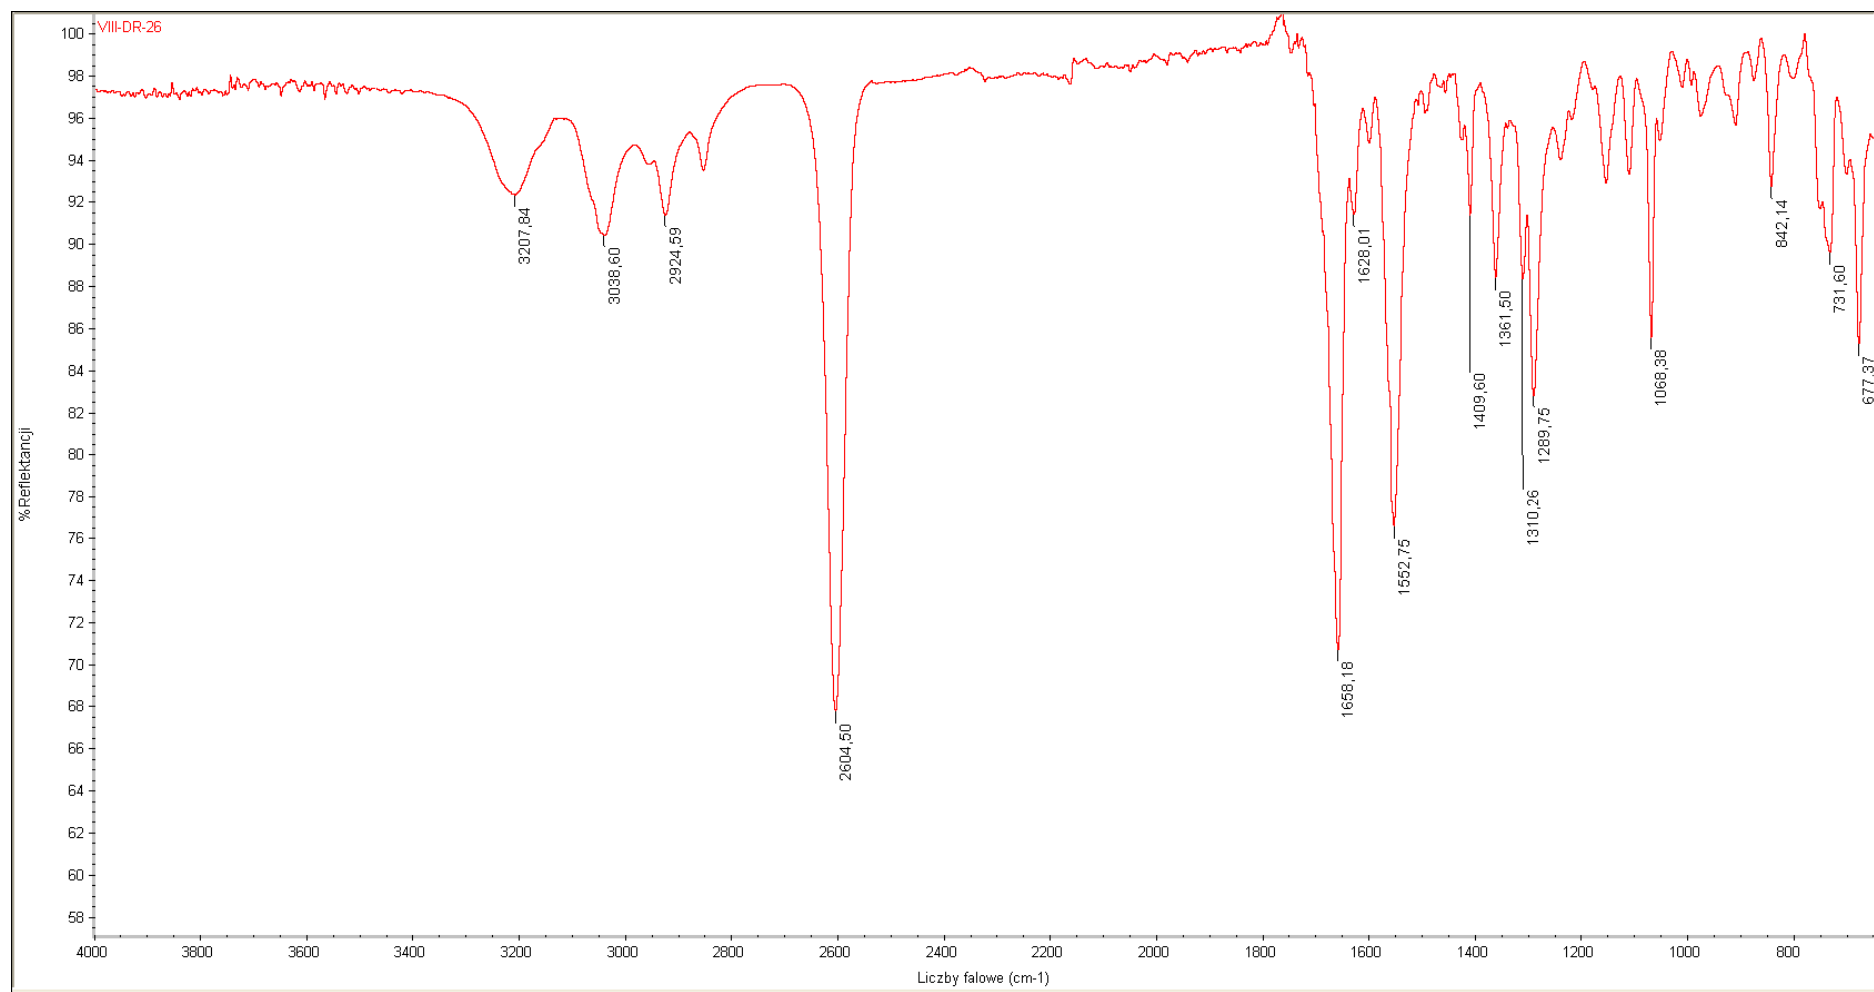

**Figure S57.** IR spectrum of compound 22.

Spectrum Name: VIII-DR-26\_frg\_dod  
Start Ion: 100  
End Ion: 500  
Source: APCI + 10.0µA 250C  
Capillary: 150V 200C Offset: 15V Span: 0V

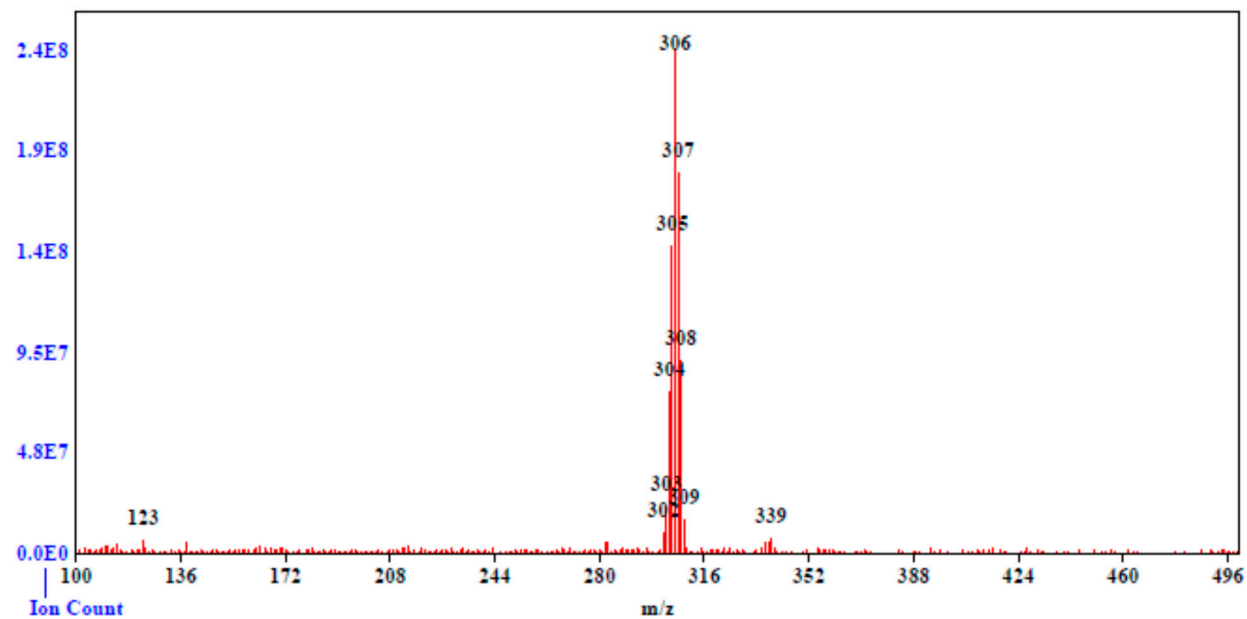

Figure S58. MS spectrum of compound 22.

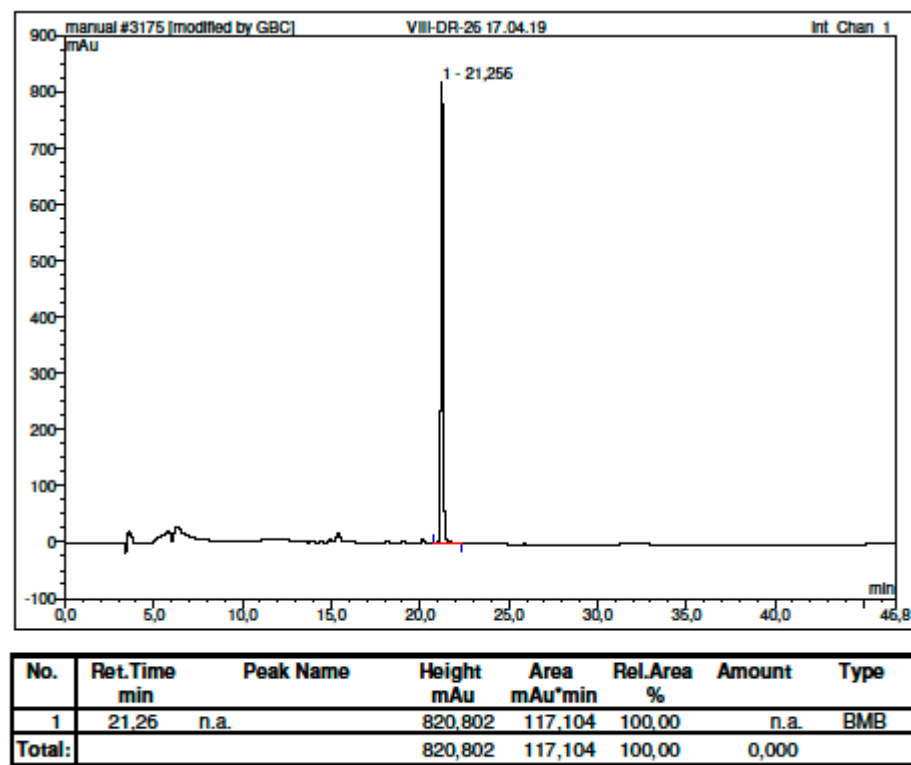

Figure S59. HPLC analysis of compound 22.

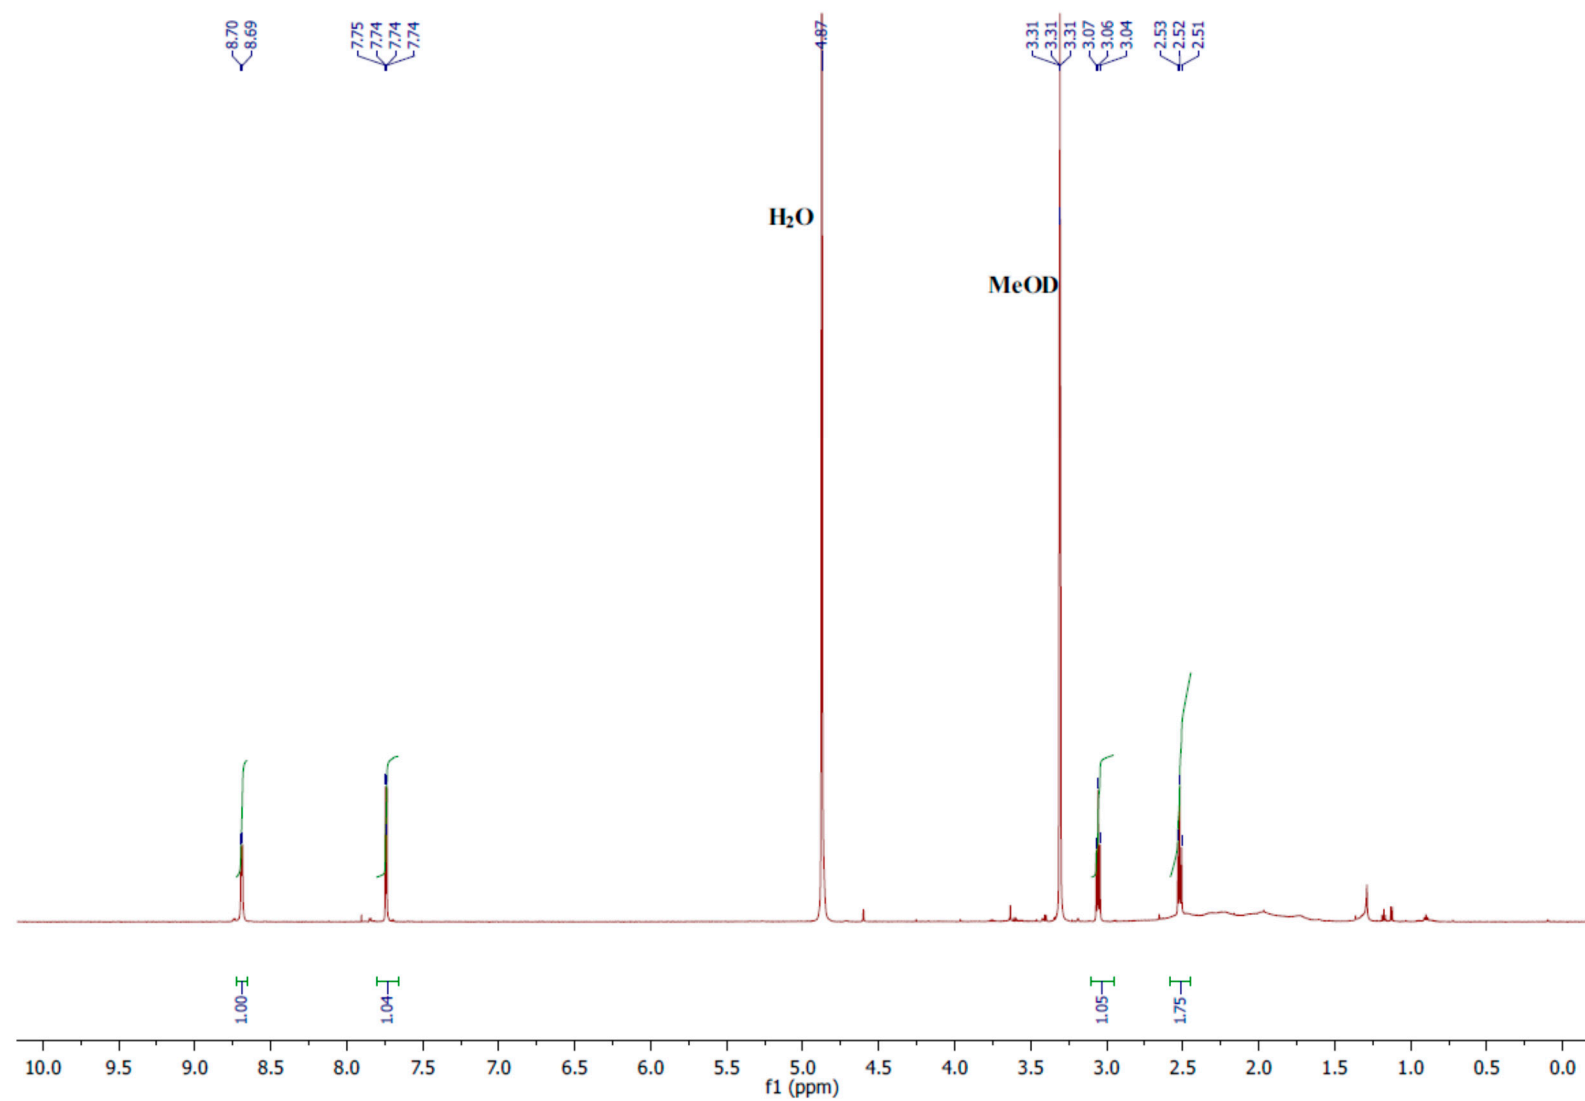

Figure S60. <sup>1</sup>H NMR spectrum of compound 23.

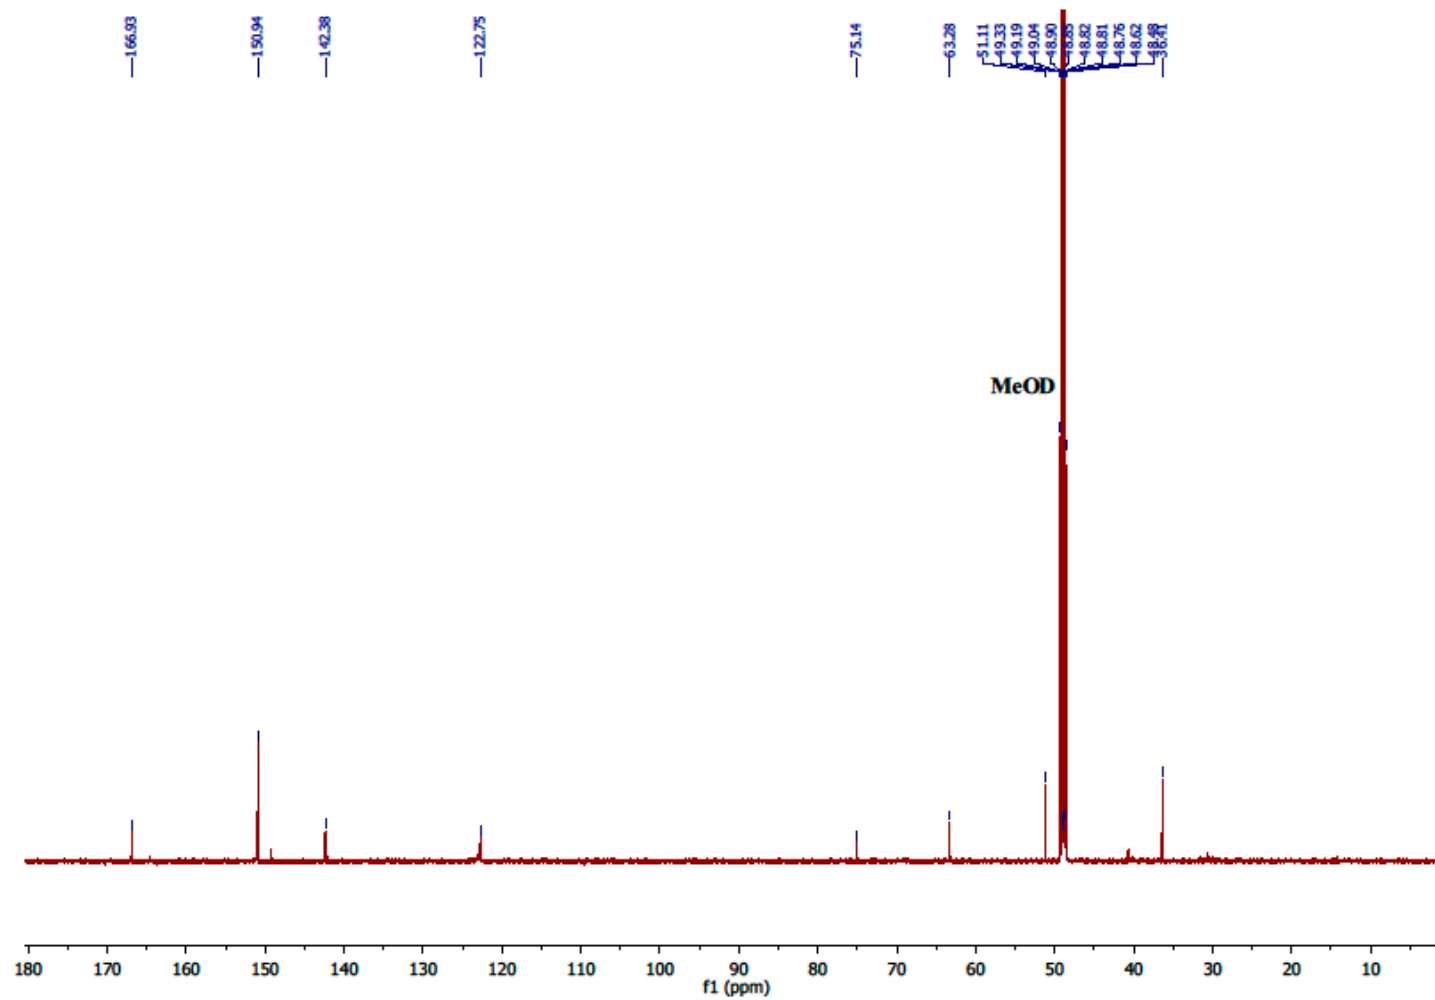

Figure S61. <sup>13</sup>C NMR spectrum of compound 23.



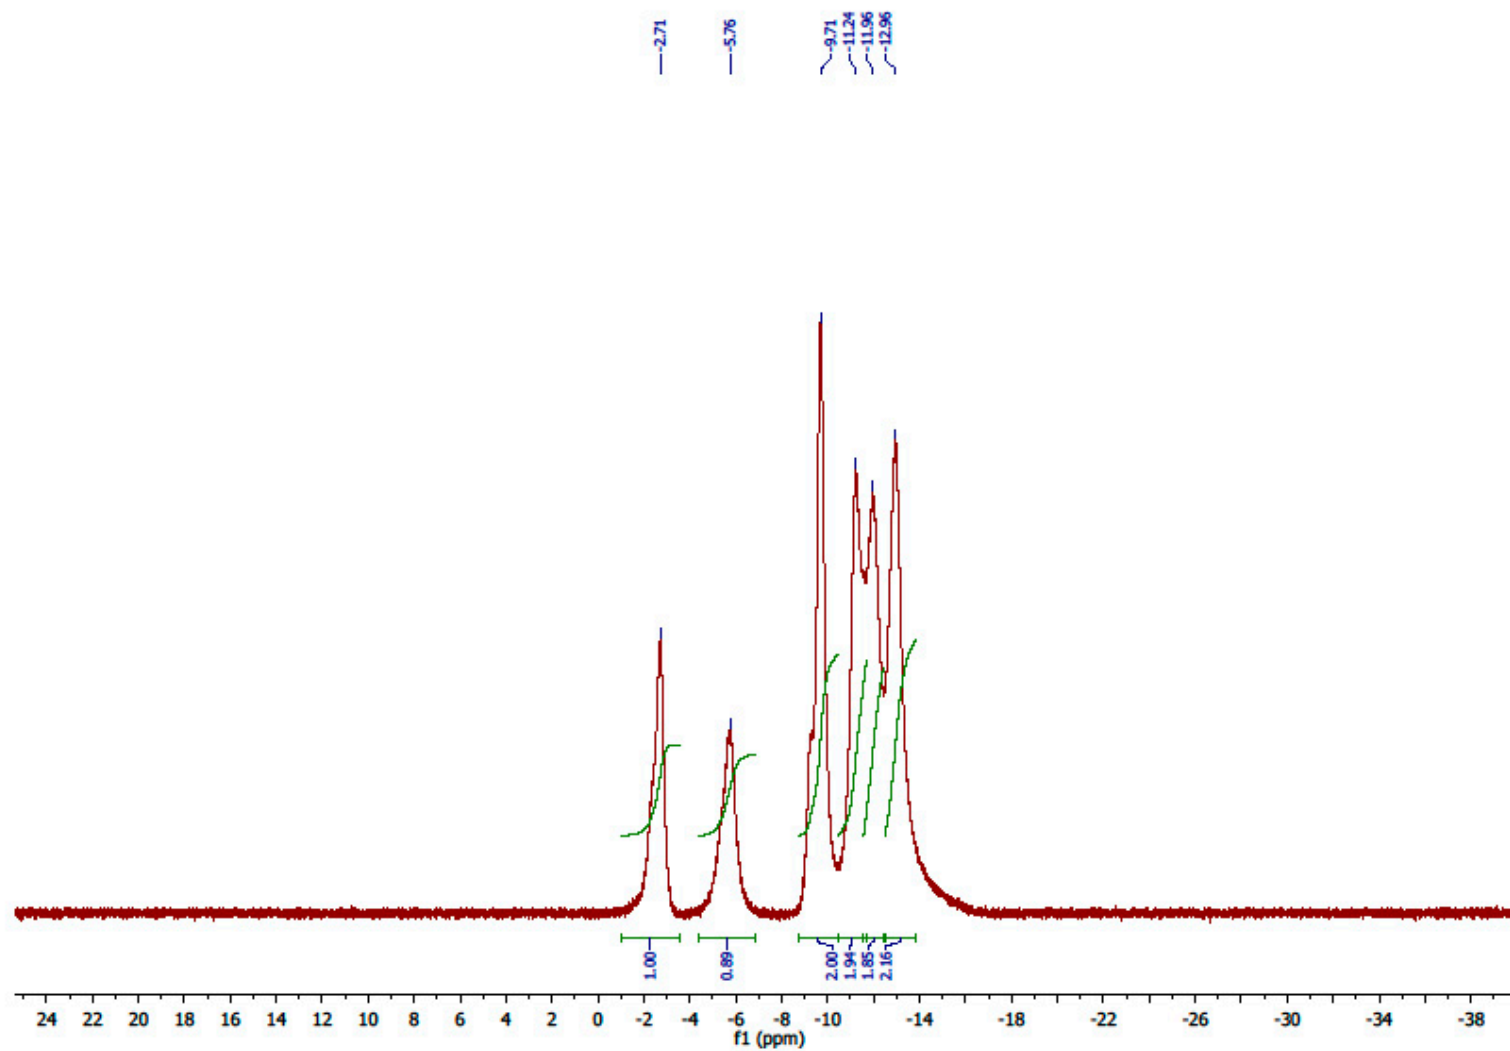

Figure S62.  $^1\text{B}$  NMR  $\{^1\text{H BB}\}$  spectrum of compound 23.

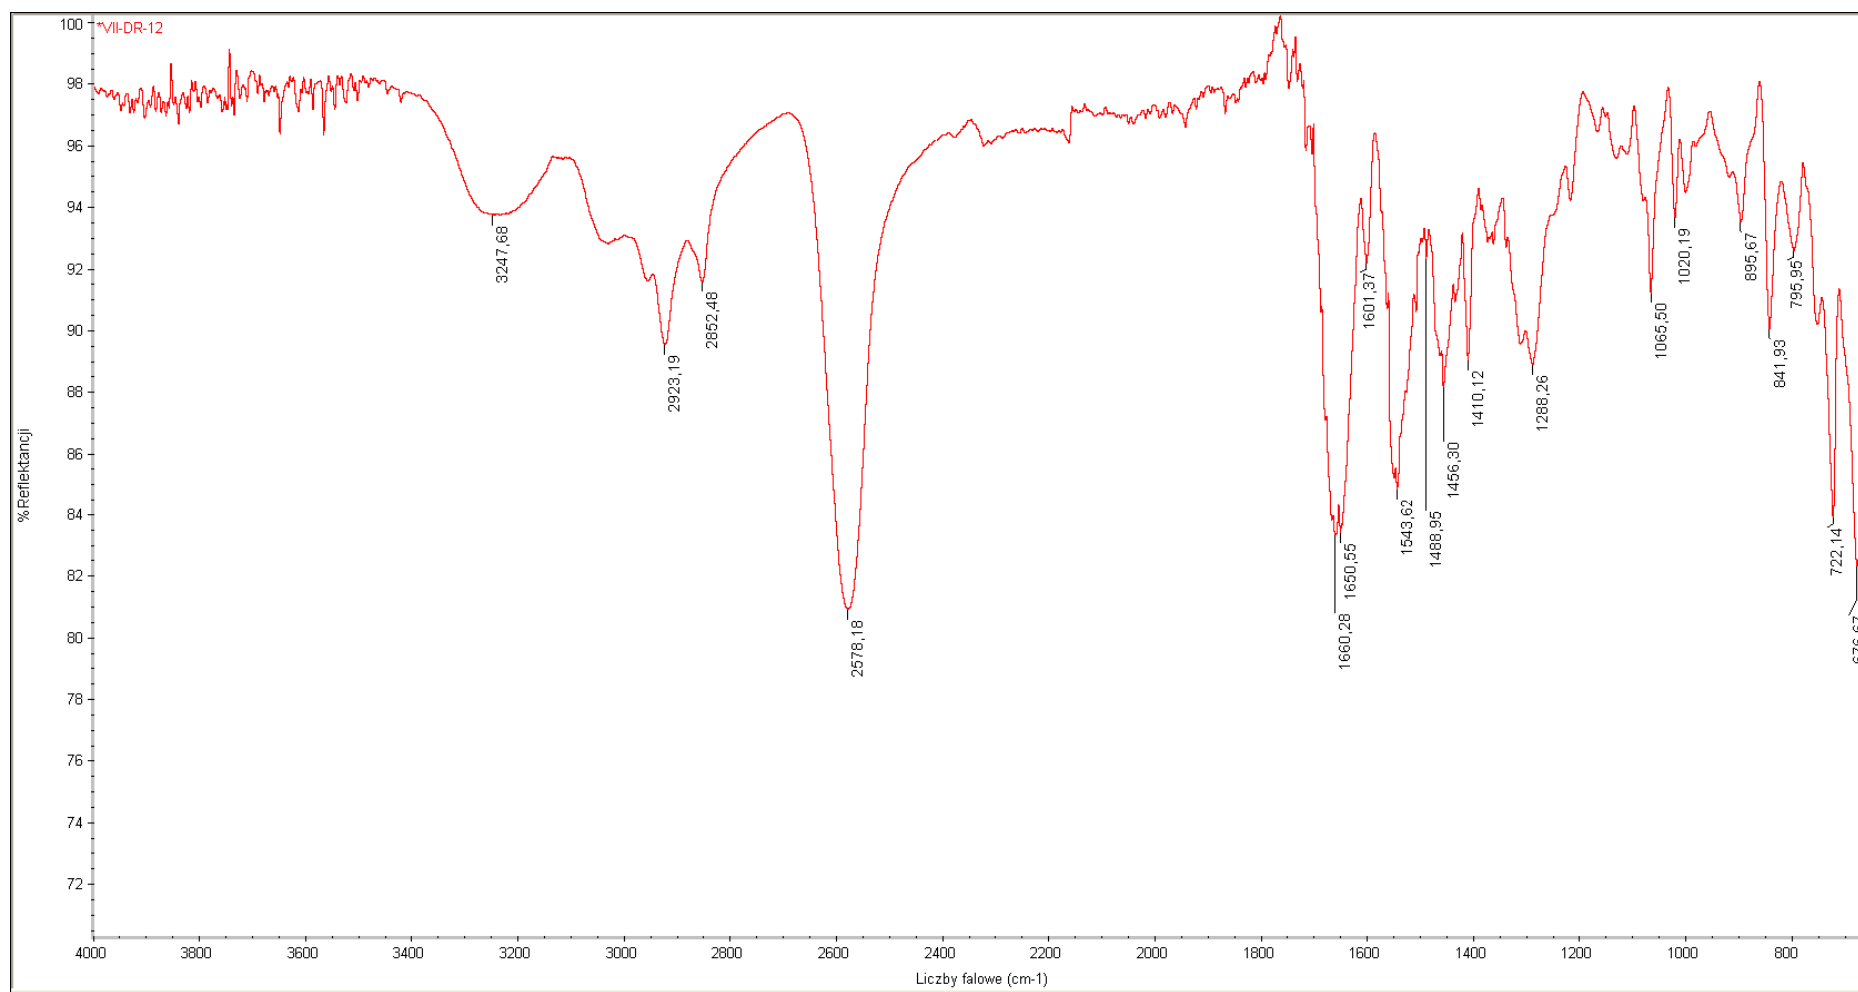

Figure S63. IR spectrum of compound 23.

Spectrum Name: VII-DR-12\_rob\_dod  
Start Ion: 100  
End Ion: 500  
Source: APCI + 10.0 $\mu$ A 400C  
Capillary: 180V 300C Offset: 30V Span: 20V

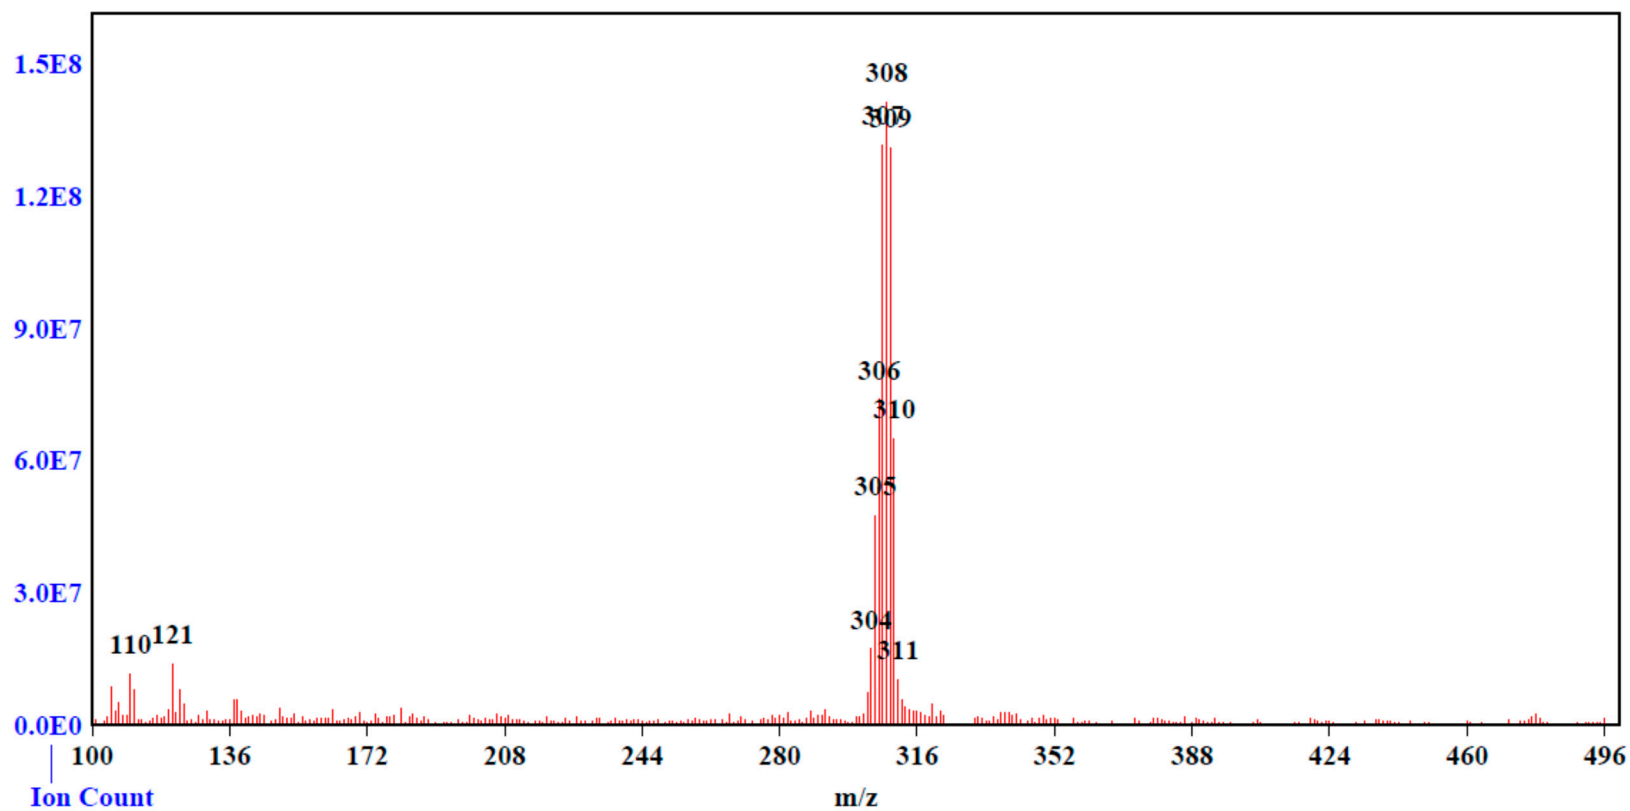

Figure S64. MS spectrum of compound 23.

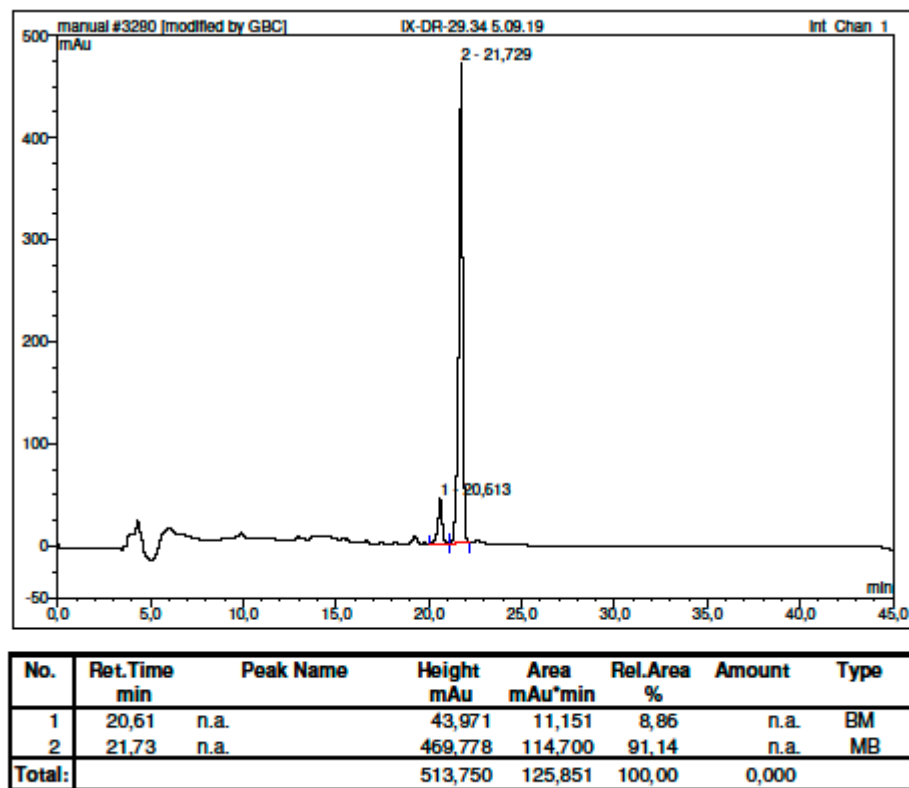

Figure S65. HPLC analysis of compound 23.

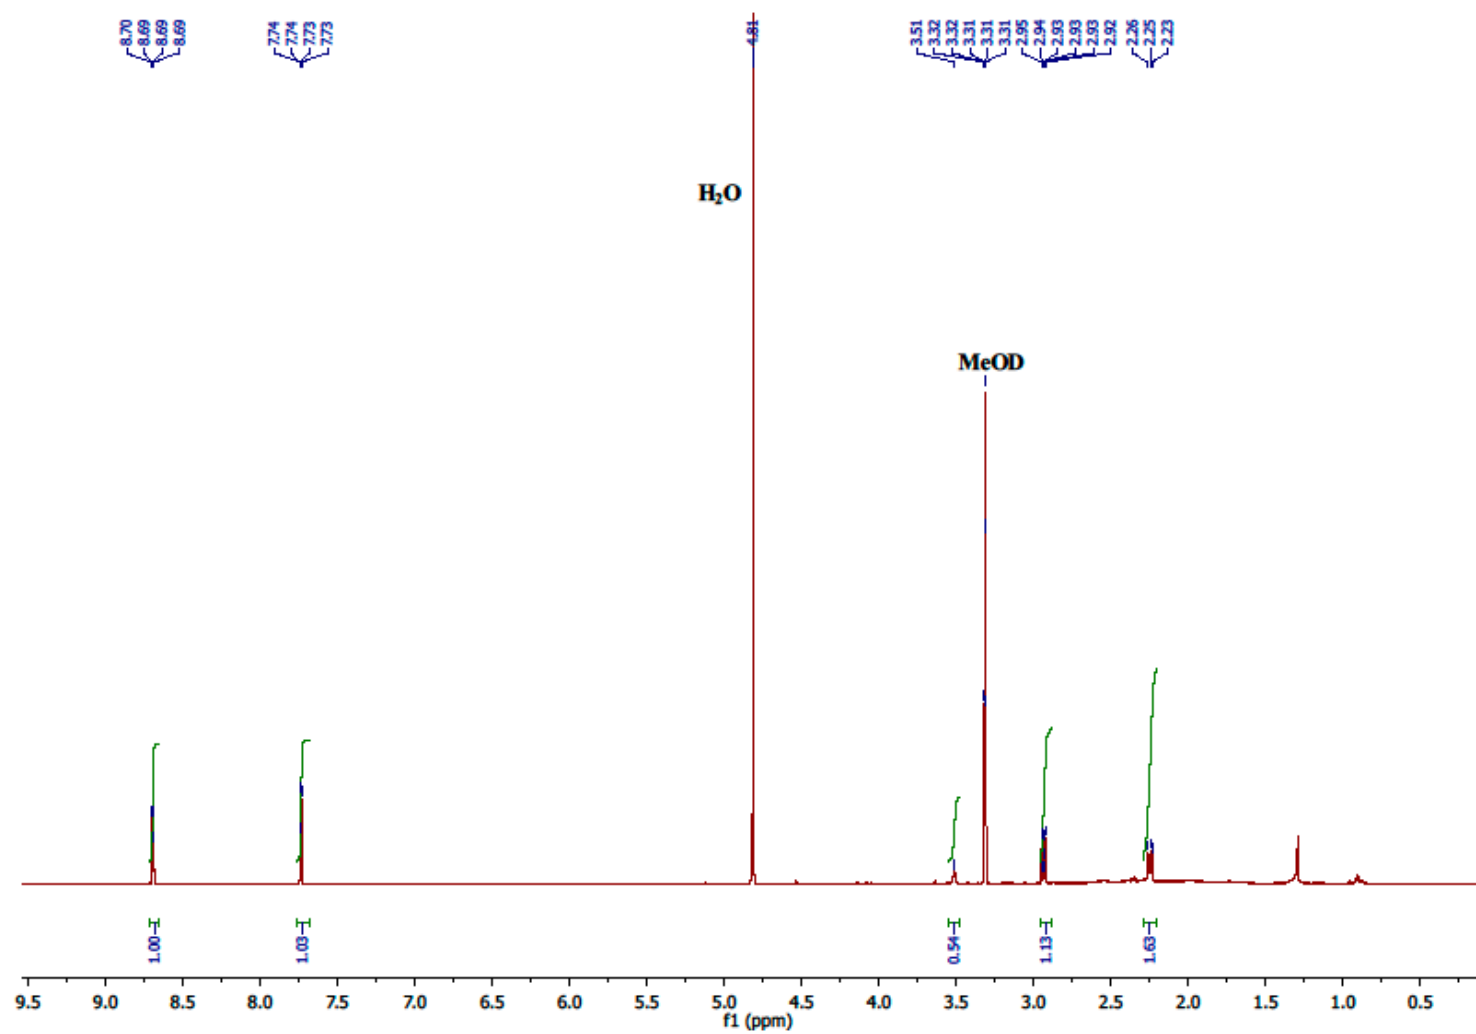

Figure S66. <sup>1</sup>H NMR spectrum of compound 24.

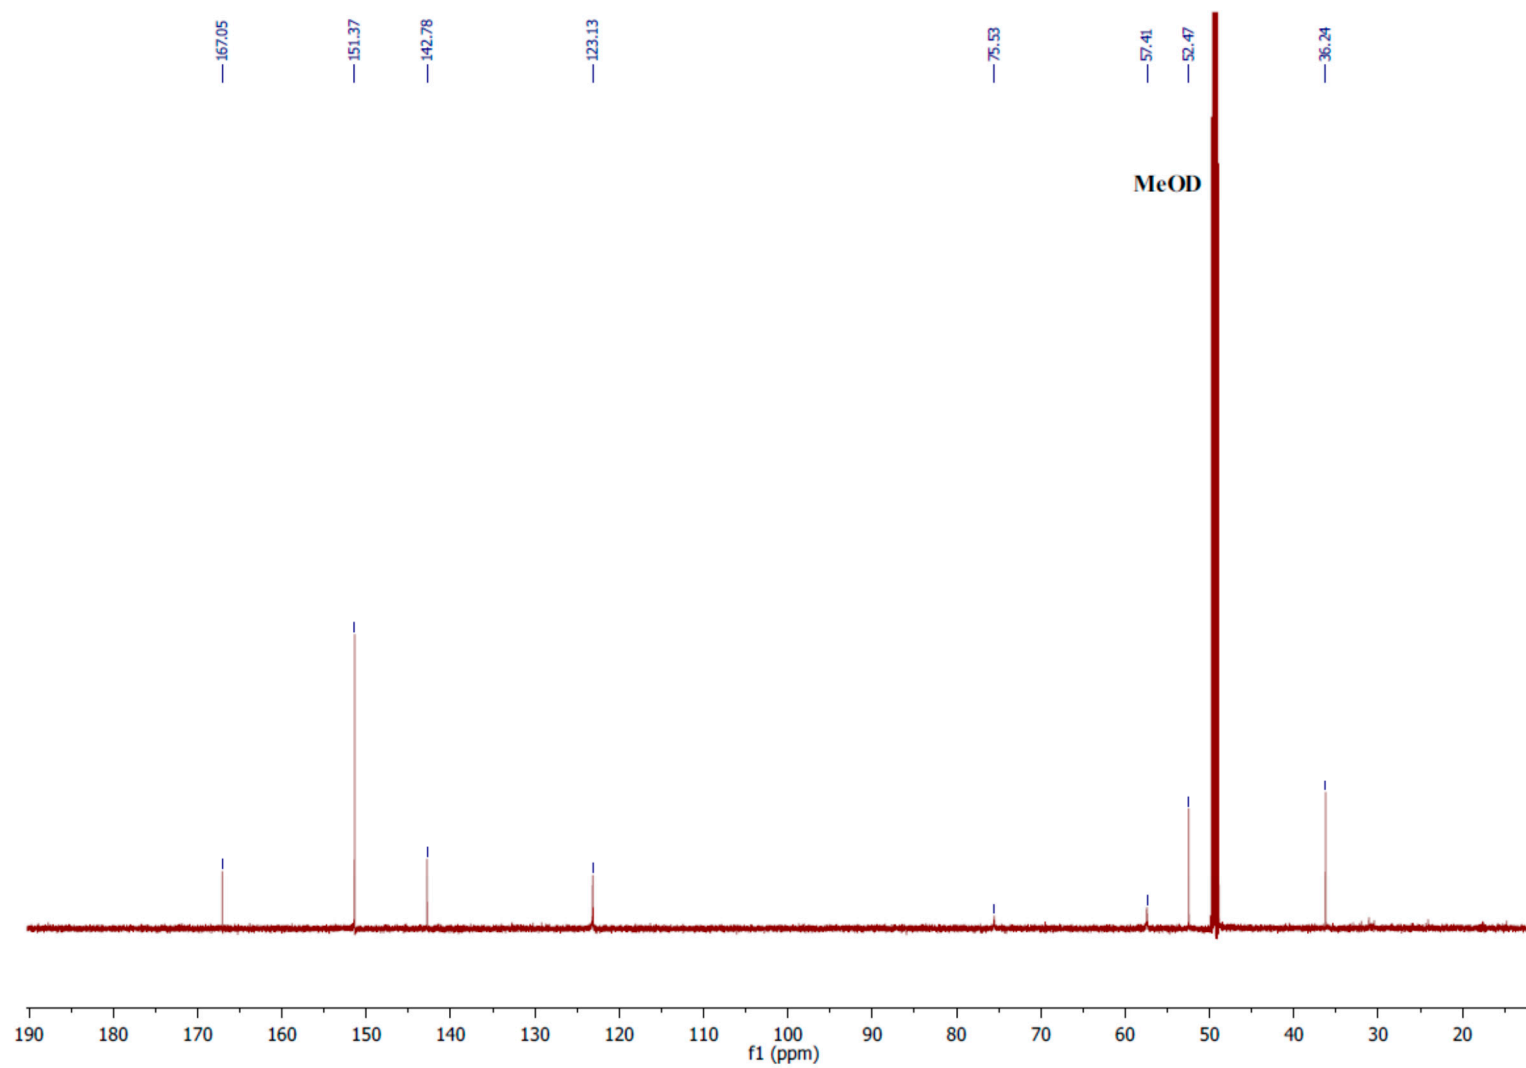

**Figure S67.** <sup>13</sup>C NMR spectrum of compound 24.

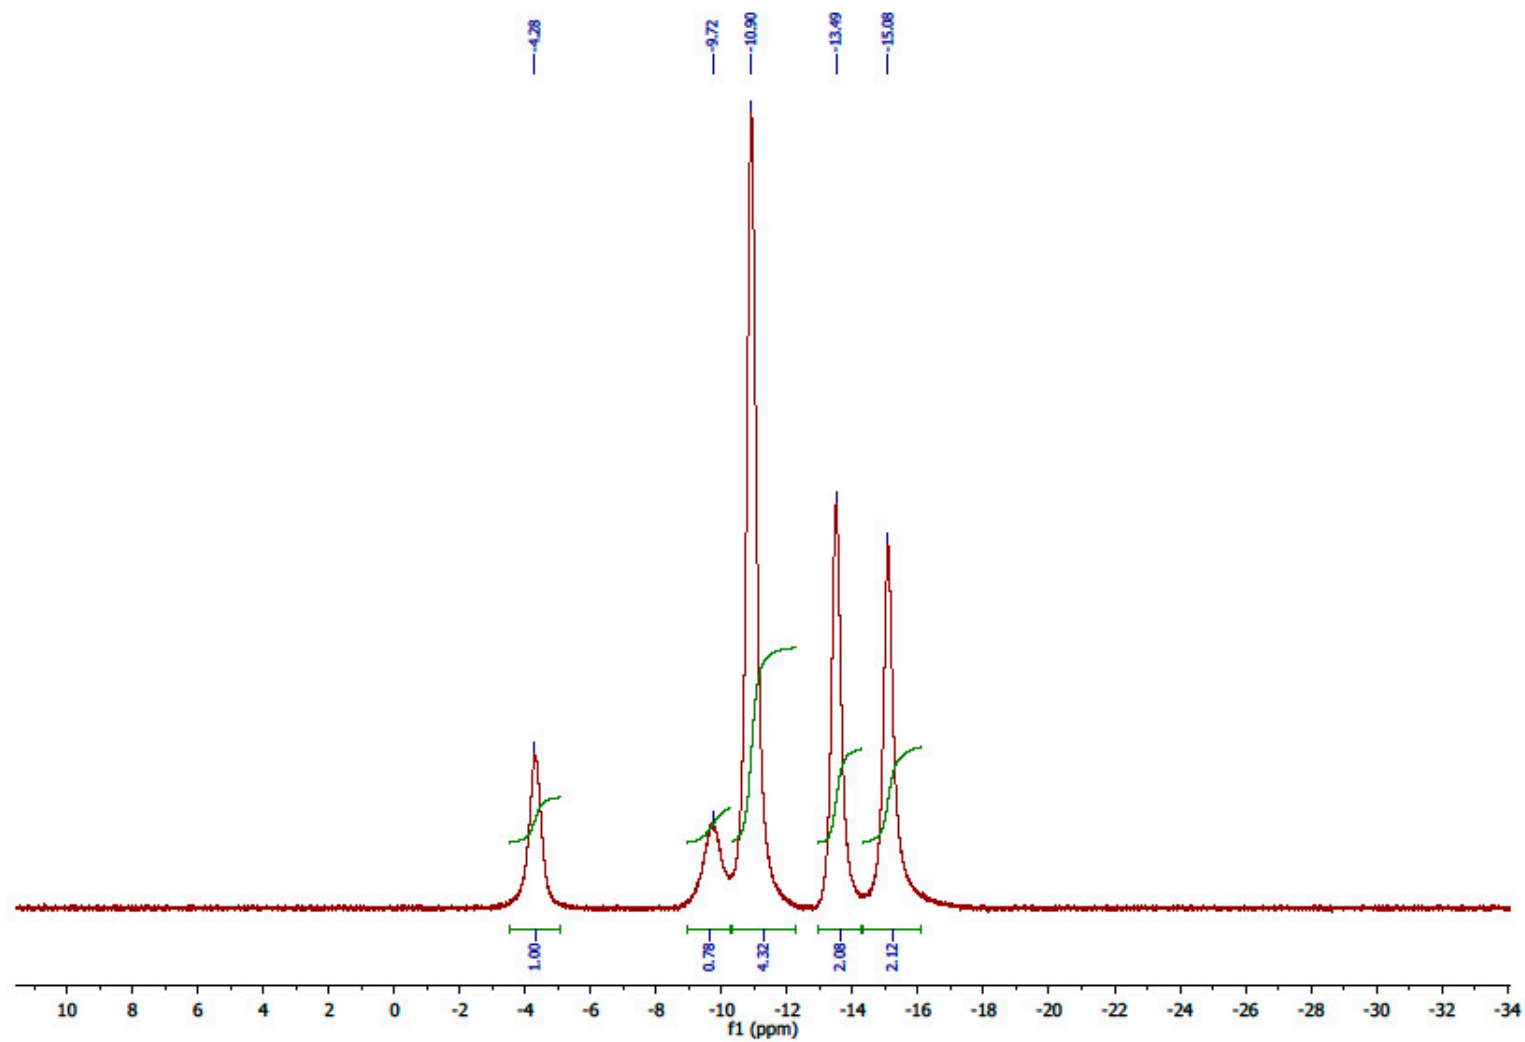

Figure S68.  $^{11}\text{B}$  NMR  $\{^1\text{H BB}\}$  spectrum of compound 24.

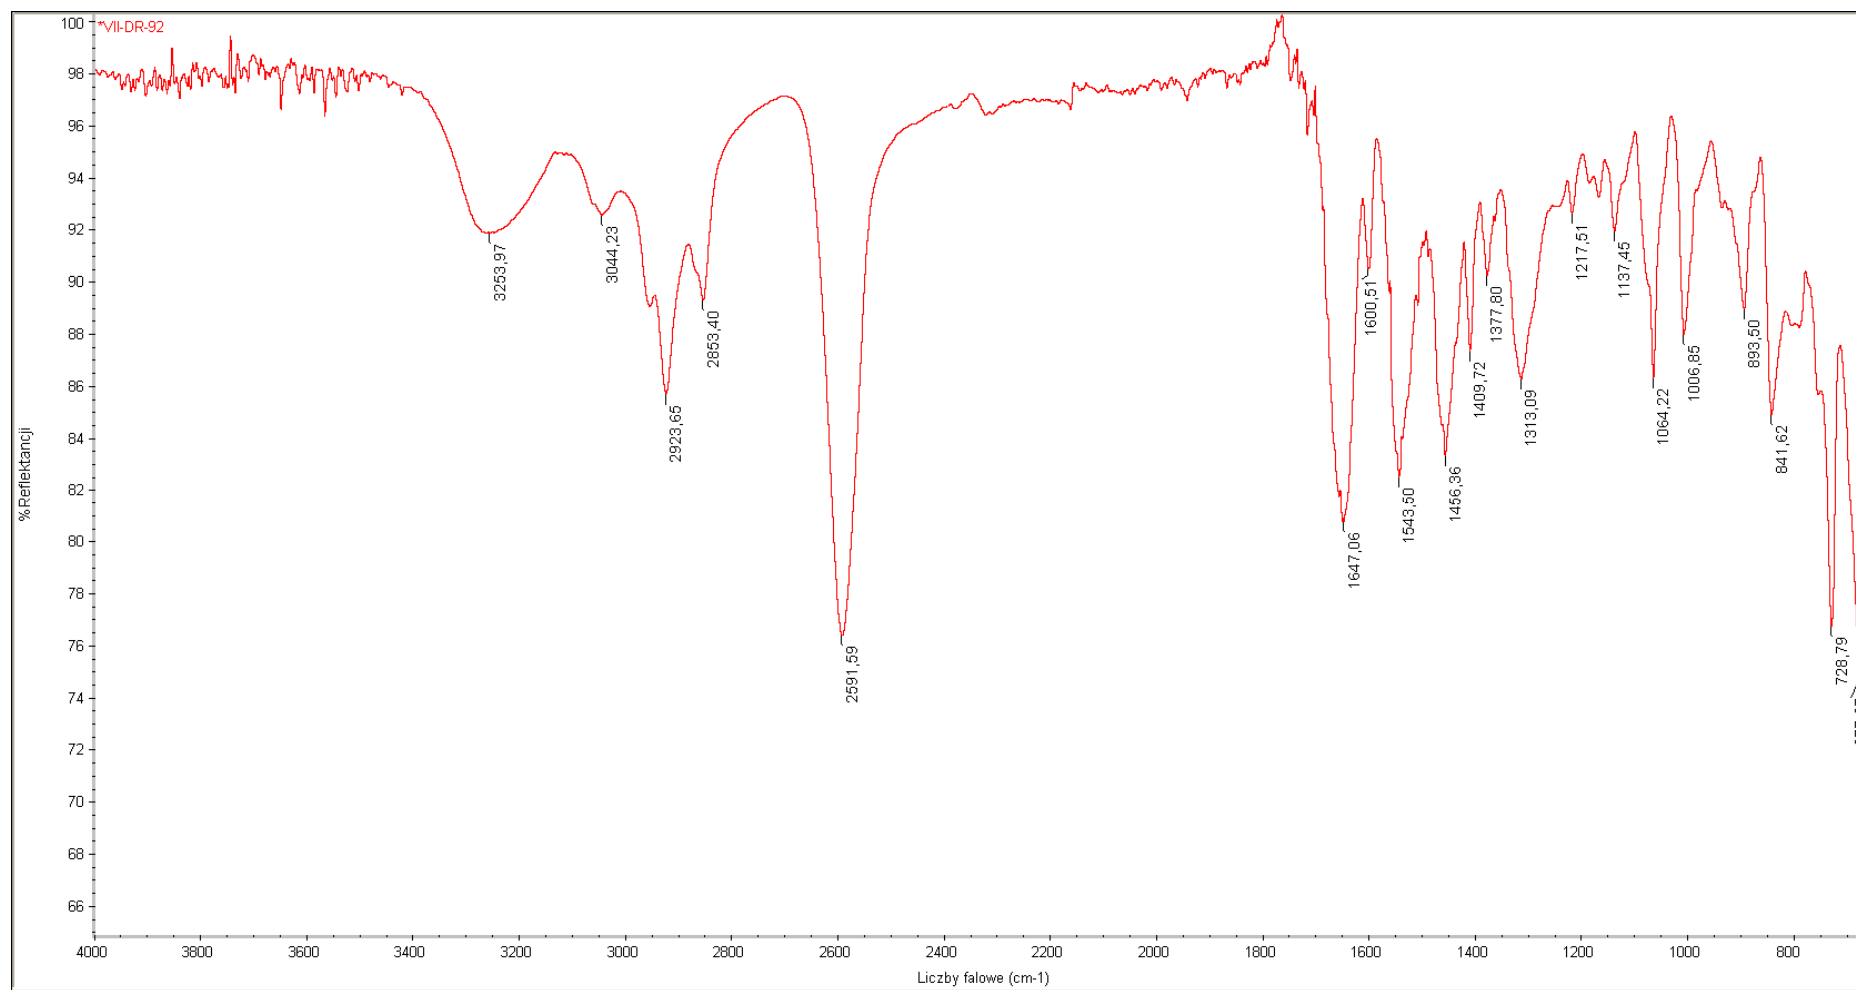

**Figure S69.** IR spectrum of compound **24**.



Spectrum Name: VI-DR-92\_frg\_dod  
Start Ion: 200  
End Ion: 450  
Source: APCI + 10.0 $\mu$ A 250C  
Capillary: 150V 200C Offset: 15V Span: 0V

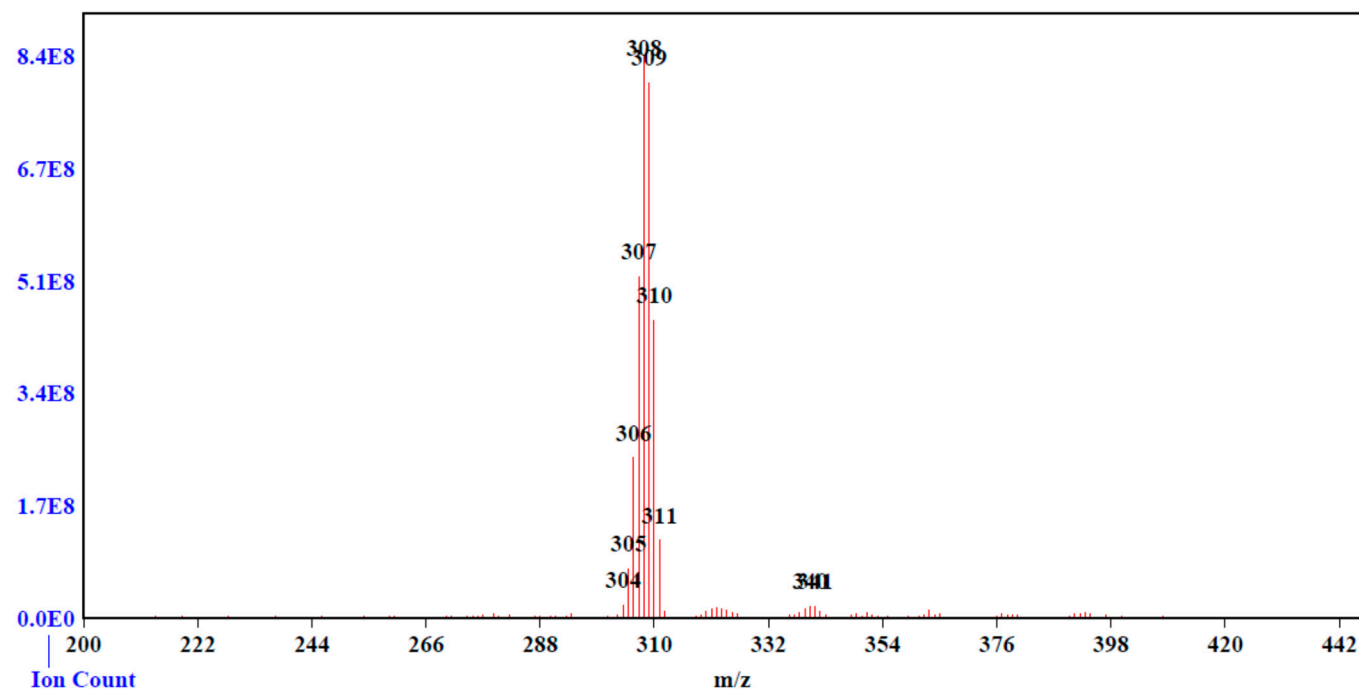

Figure S70. MS spectrum of compound 24.

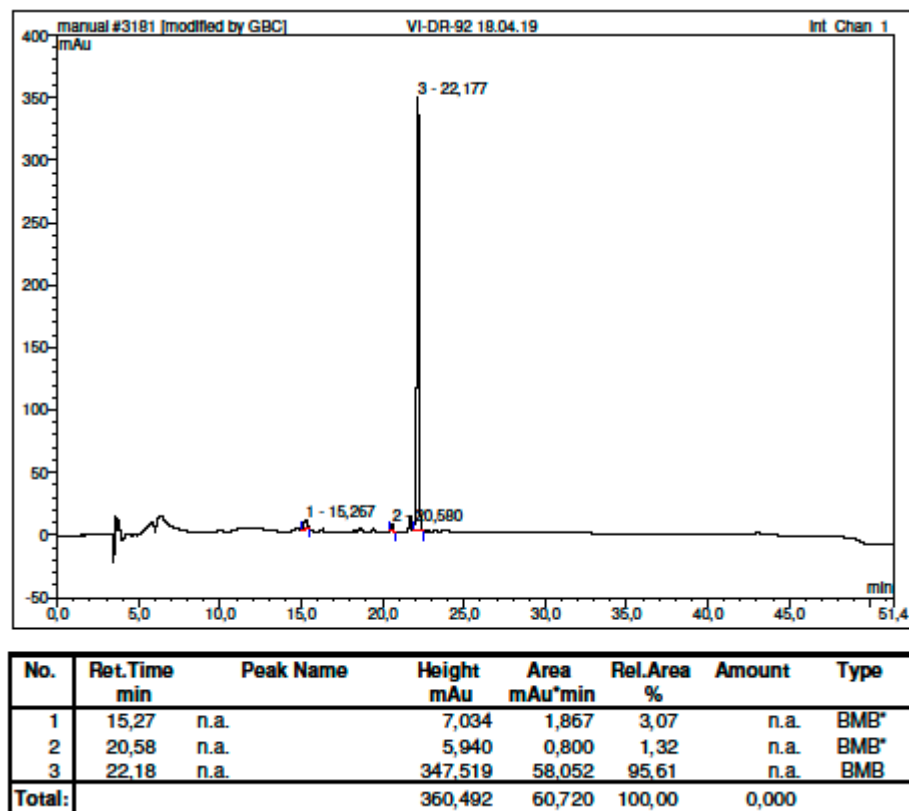

Figure S71. HPLC analysis of compound 24.

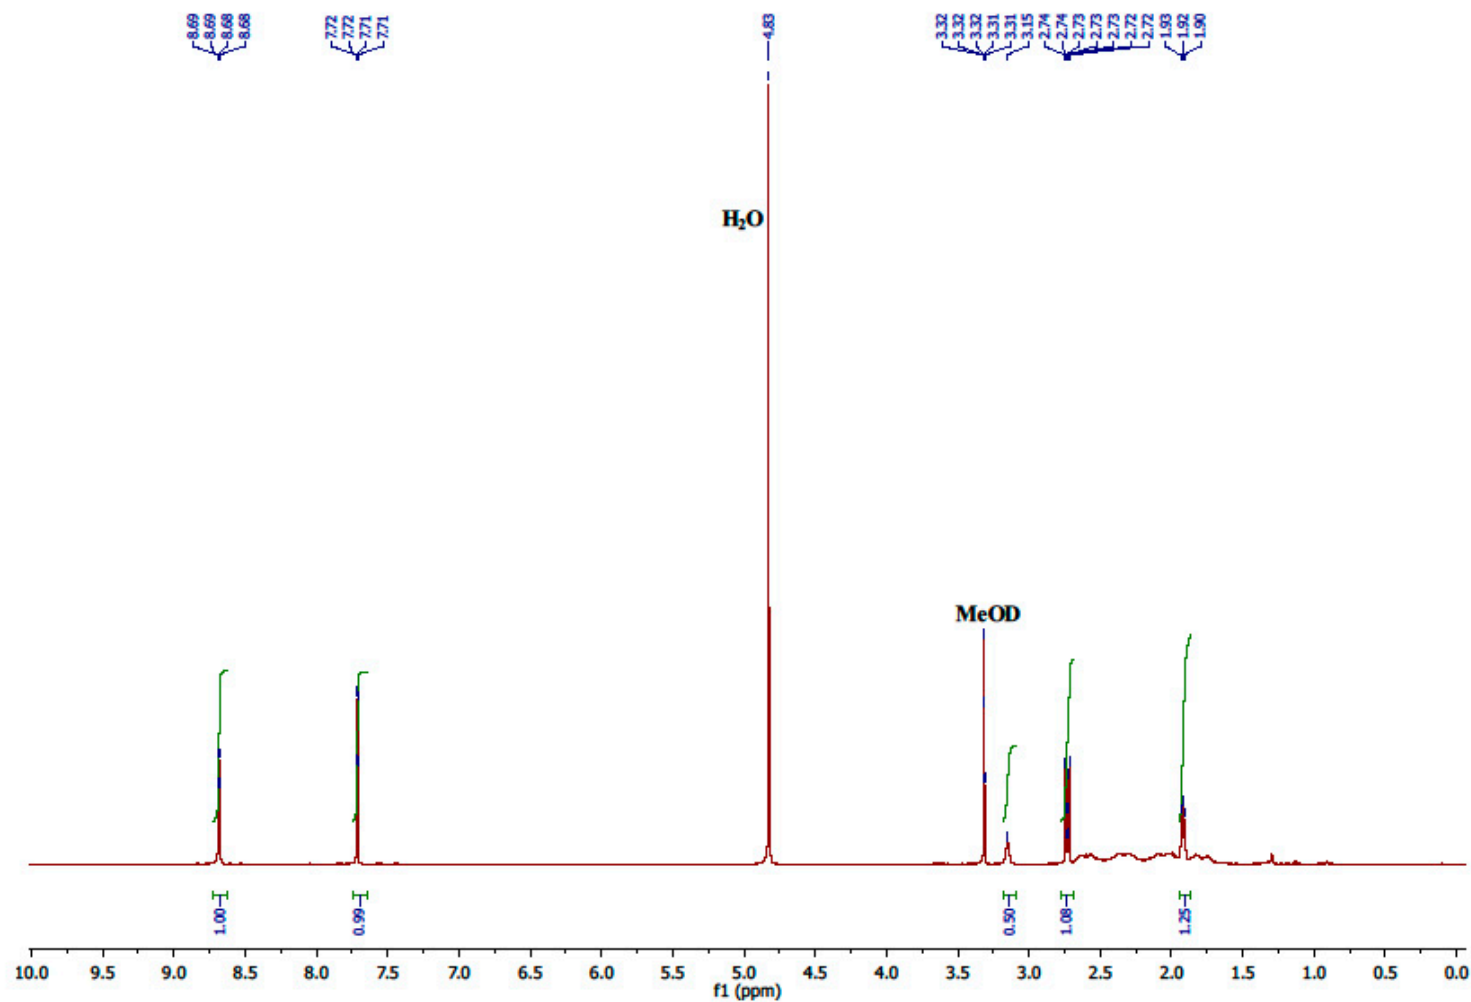

Figure S72. <sup>1</sup>H NMR spectrum of compound 25.

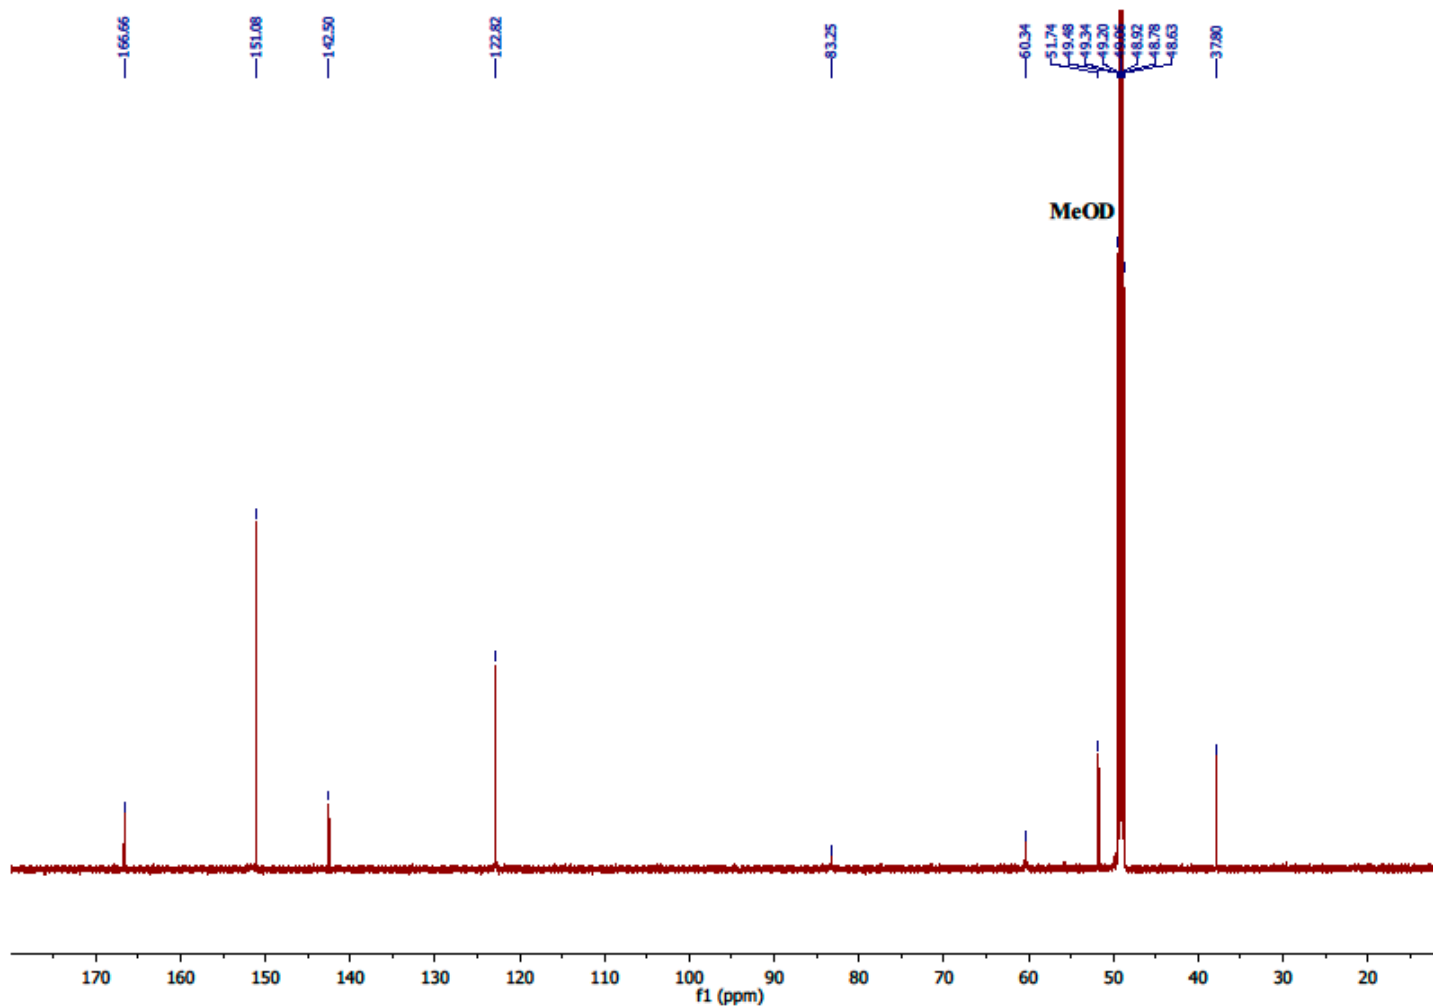

Figure S73. <sup>13</sup>C NMR spectrum of compound 25.

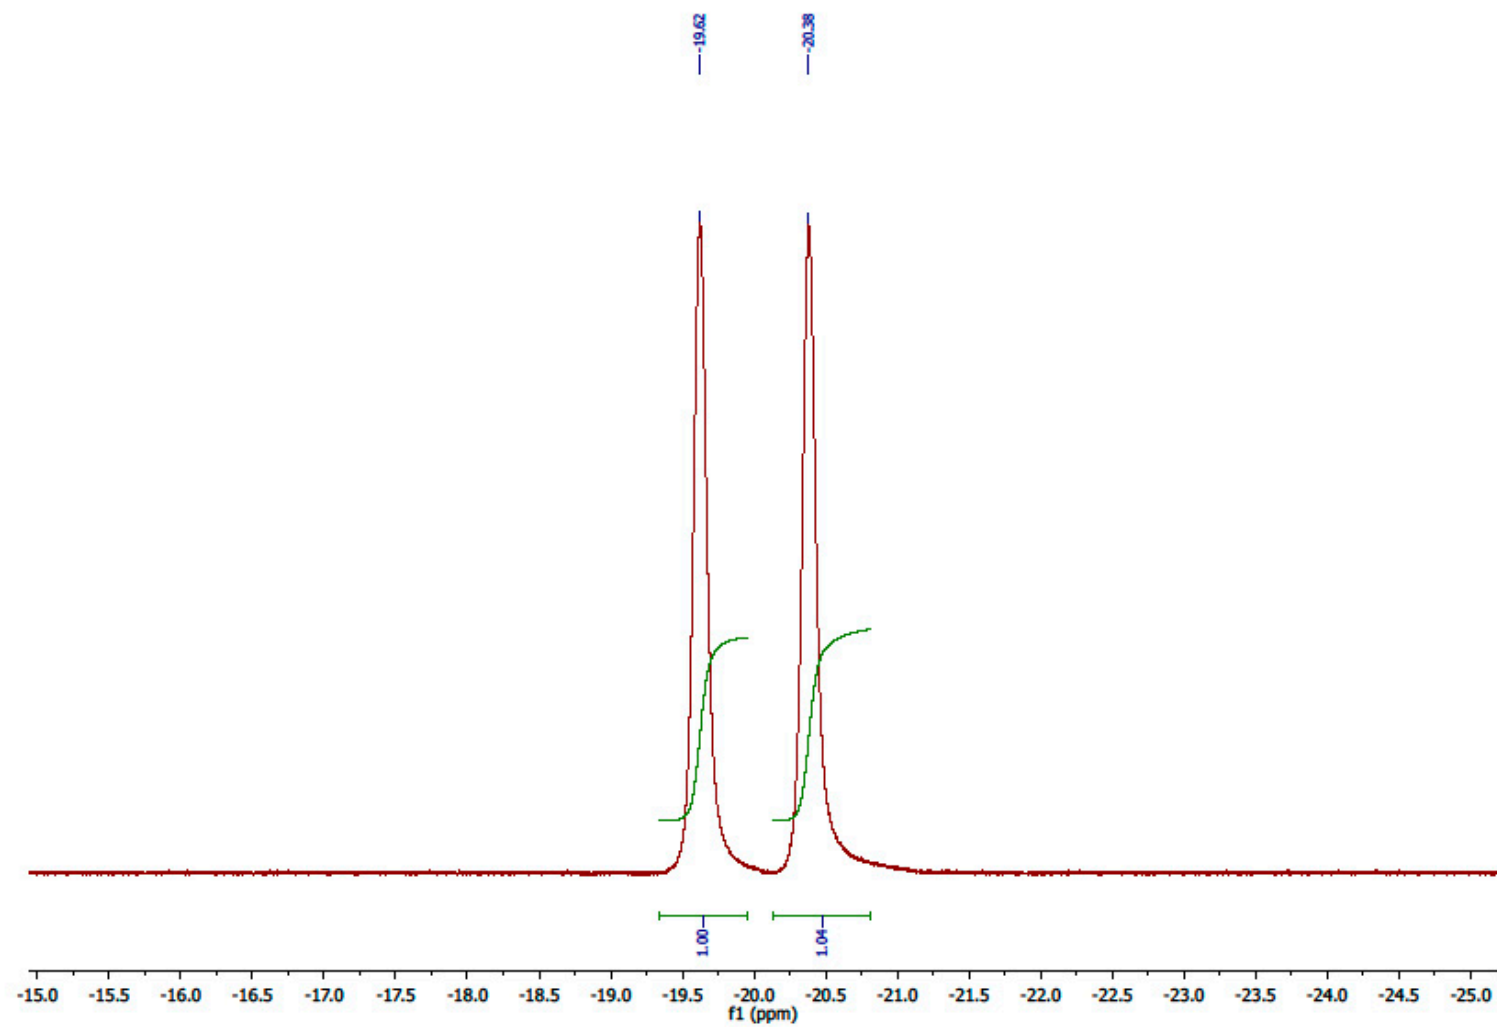

Figure S74.  $^{11}\text{B}$  NMR  $\{^1\text{H BB}\}$  spectrum of compound 25.

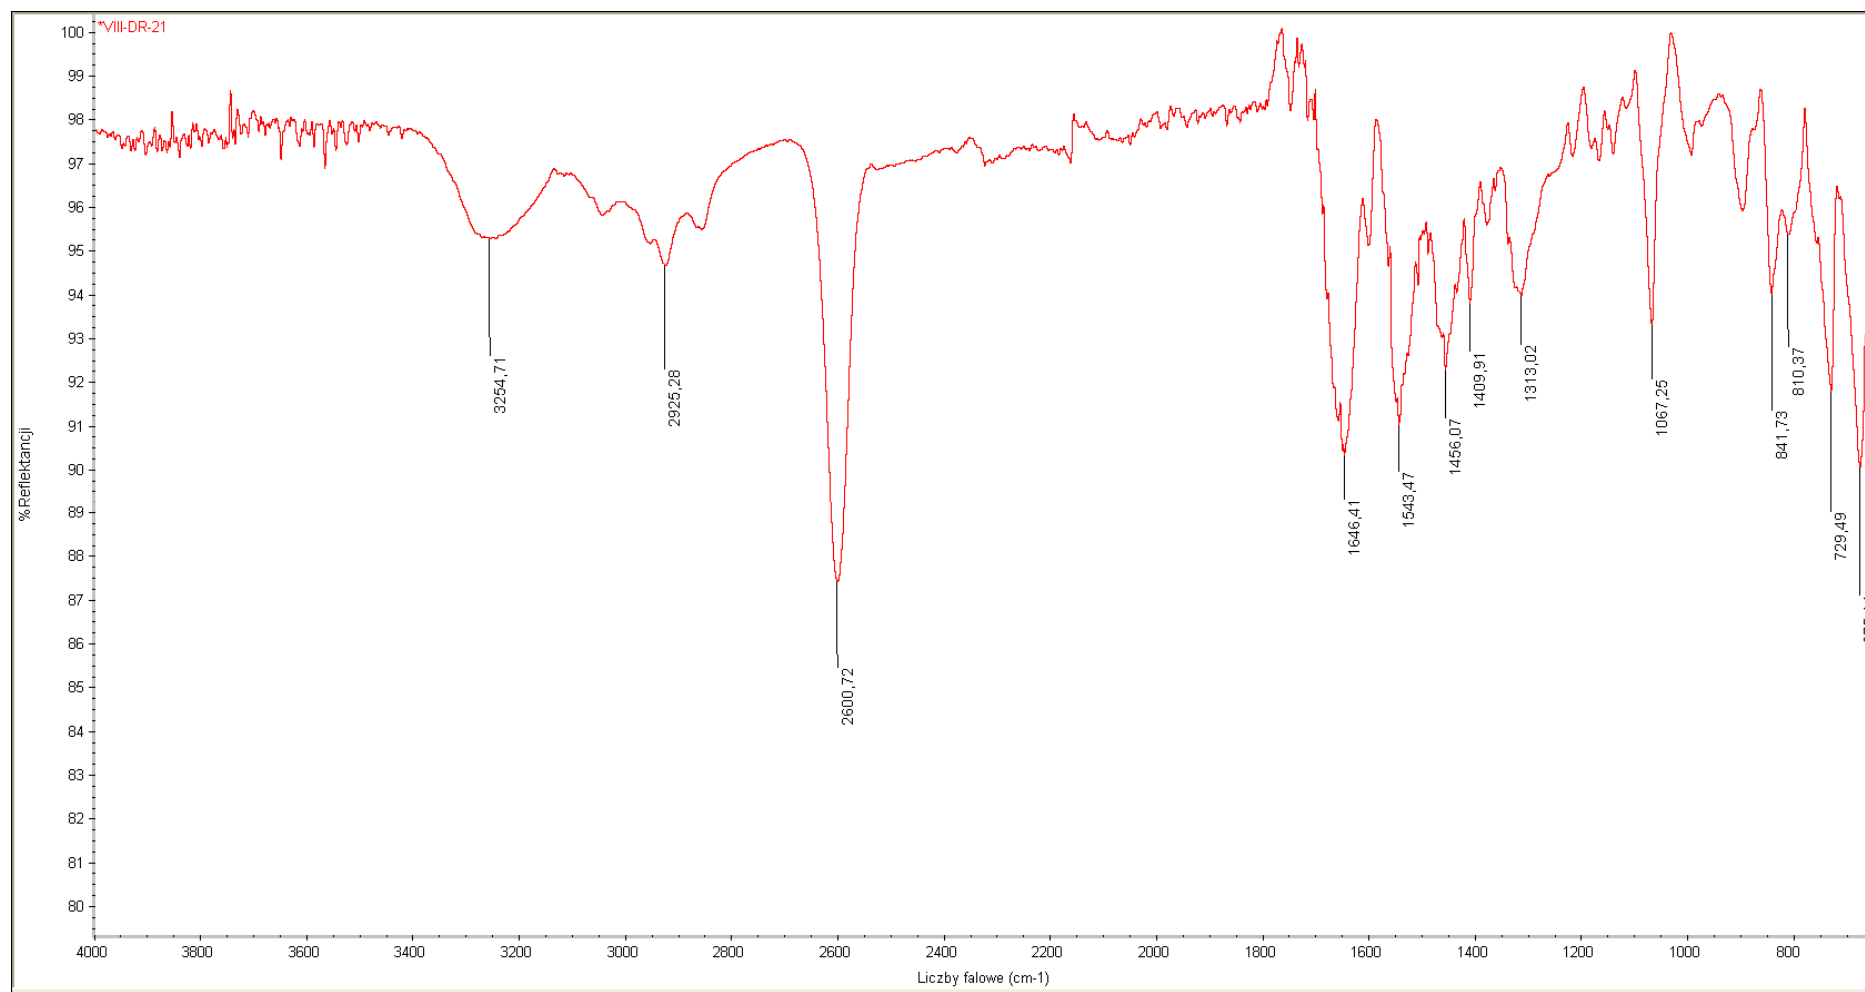

Figure S75. IR spectrum of compound 25.

Spectrum Name: VIII-DR-21\_typ\_dod  
Start Ion: 100  
End Ion: 500  
Source: APCI + 10.0  $\mu$ A 400C  
Capillary: 150V 300C Offset: 25V Span: 0V

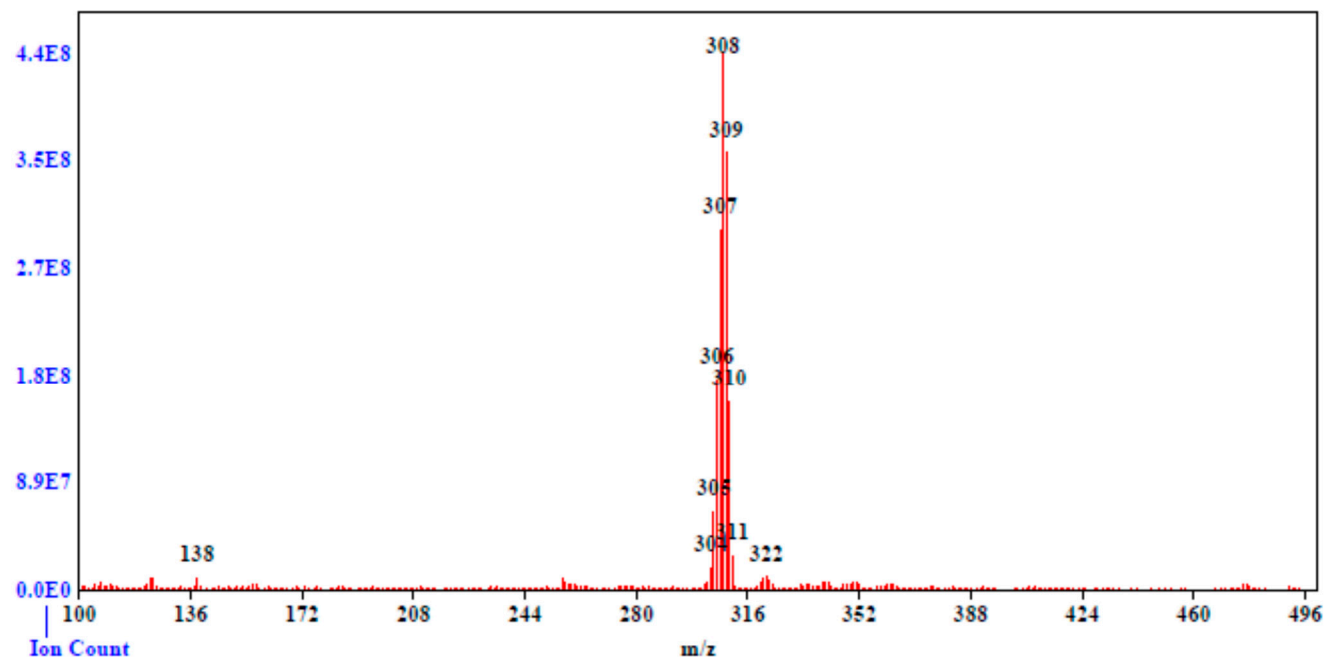

Figure S76. MS spectrum of compound 25.

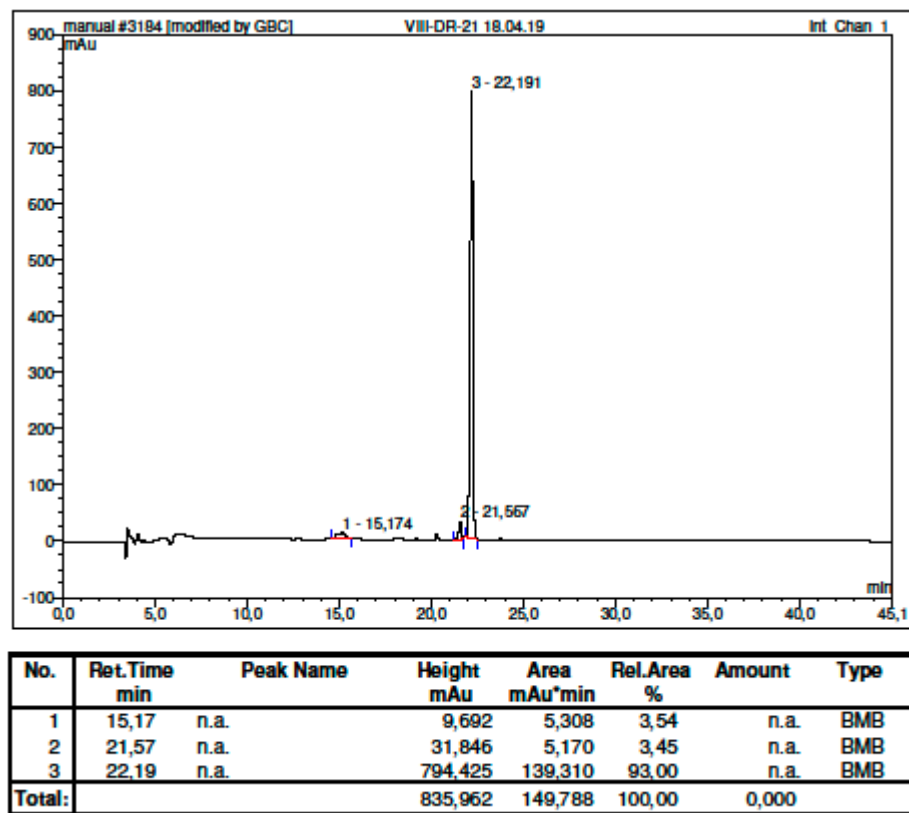

Figure S77. HPLC analysis of compound 25.



**Table S1.** Crystallographic data.

| <b>Compound</b>                      | <b>14</b>                | <b>15</b>                | <b>21</b>                |
|--------------------------------------|--------------------------|--------------------------|--------------------------|
| Wavelength [Å]                       | 0.71073 (Mo K $\alpha$ ) | 0.71073 (Mo K $\alpha$ ) | 1.54184 (Cu K $\alpha$ ) |
| Temperature [K]                      | 132                      | 131                      | 130                      |
| Space group                          | Pbcn                     | P2 <sub>1</sub> /c       | C2/c                     |
| Z                                    | 8                        | 4                        | 8                        |
| <i>a</i> [Å]                         | 20.6123(11)              | 10.9141(5)               | 21.3660(4)               |
| <i>b</i> [Å]                         | 7.7069(4)                | 20.0103(9)               | 6.47800(10)              |
| <i>c</i> [Å]                         | 20.7512(9)               | 7.6763(5)                | 27.1899(5)               |
| $\beta$ [°]                          | 90                       | 108.904(15)              | 103.552(2)               |
| R <sub>int</sub>                     | 0.0565                   | 0.0331                   | 0.0295                   |
| Resolution [Å]                       | 0.77                     | 0.77                     | 0.79                     |
| % completeness                       | 94                       | 90.3                     | 98                       |
| Independent reflections              | 3522                     | 3239                     | 3772                     |
| R/R(for F <sub>o</sub> >4 $\sigma$ ) | 0.0890/0.0556            | 0.0502/0.0429            | 0.0482/0.0443            |
| CSD code                             | 2012276                  | 2012274                  | 2012277                  |

#### General procedure for competitive trapping

Compound (1.45-3.45 mg, 4.7-11.4  $\mu\text{mol}$ ), TEMPO (1 eq.), and Mn catalyst ( $[\text{Mn}^{\text{IV}}\text{-Mn}^{\text{IV}}(\mu\text{-O})_3\text{L}_2](\text{PF}_6)_2$  (L = 1,4,7-trimethyl-1,4,7-triazacyclononane) ( $6 \times 10^{-3}$  mmol, 1.6 mol%) was dissolved in degassed ( $\text{Ar}_{(\text{g})}$ ) solution of MeOH/ACN (1:99, v/v). Periodic acid (2 eq.) was added slowly and the reaction mixture stirred for further 15 min. The solvent was removed and the reaction was quenched by  $\text{H}_2\text{SO}_4$  (1 M, 20-25  $\mu\text{L}$ ), potassium bicarbonate (0.5 M, 20-25  $\mu\text{L}$ ) and saturated sodium sulfite solution (20-25  $\mu\text{L}$ ). The mixture was made alkaline with sodium carbonate and extracted with dichloromethane ( $3 \times 0.1$  mL). The organic phase was separated, dried over  $\text{MgSO}_4$ , filtered and evaporated to dryness. Then, the product was purified by column chromatography on silica gel (230-400 mesh) using a gradient elution from 0 to 10% MeOH in  $\text{CH}_2\text{Cl}_2$  to afford pure product.

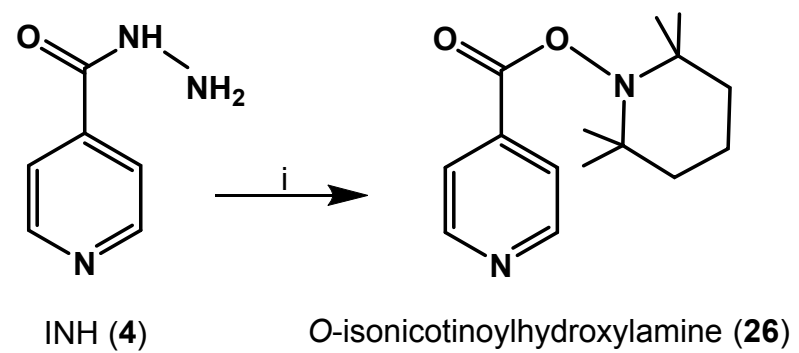

**Figure S78.** The resulting trapped product *O*-isonicotinoylhydroxylamine (**26**): i) TEMPO, MeOH/ACN (1:99, v/v), [Mn<sup>IV</sup>-Mn<sup>IV</sup>(μ-O)<sub>3</sub>L<sub>2</sub>](PF<sub>6</sub>)<sub>2</sub> (L=1,4,7-trimethyl-1,4,7-triazacyclononane)/H<sub>5</sub>IO<sub>6</sub>.

Spectrum Name: X-DR-89\_fg\_  
Start Ion: 100  
End Ion: 500  
Source: APCI + 10.0 $\mu$ A 250C  
Capillary: 150V 200C Offset: 15V Span: 0V

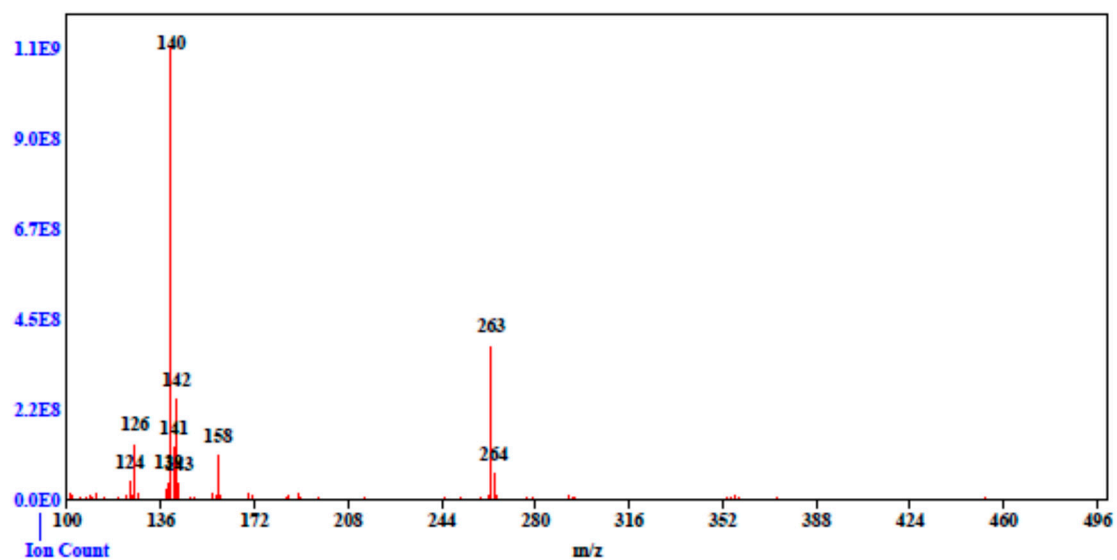

**Figure S79.** MS spectrum of reaction of INH with TEMPO, and manganese catalyst: APCI-MS:  $m/z$  263, calcd for  $C_{15}H_{22}N_2O_2 = 262$  (product **26**).

Spectrum Name: X-DR-85\_fg  
Start Ion: 100  
End Ion: 400  
Source: APCI + 10.0µA 250C  
Capillary: 150V 200C Offset: 15V Span: 0V

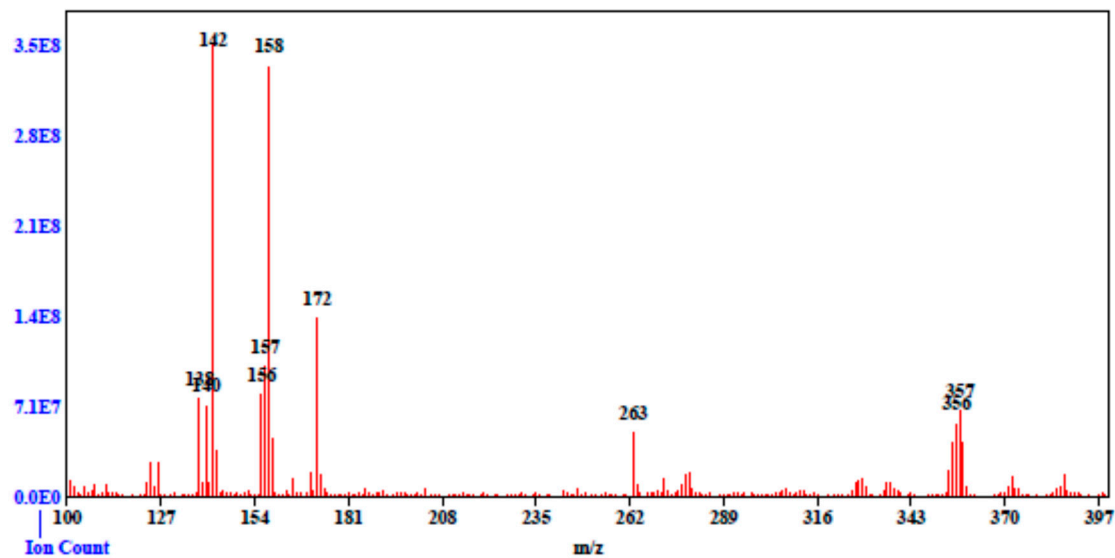

Figure S80. MS spectrum of reaction of 8 with TEMPO, and manganese catalyst.

Spectrum Name: X-DR-S7\_fg  
Start Ion: 100  
End Ion: 400  
Source: APCI + 10.0µA 250C  
Capillary: 150V 200C Offset: 15V Span: 0V

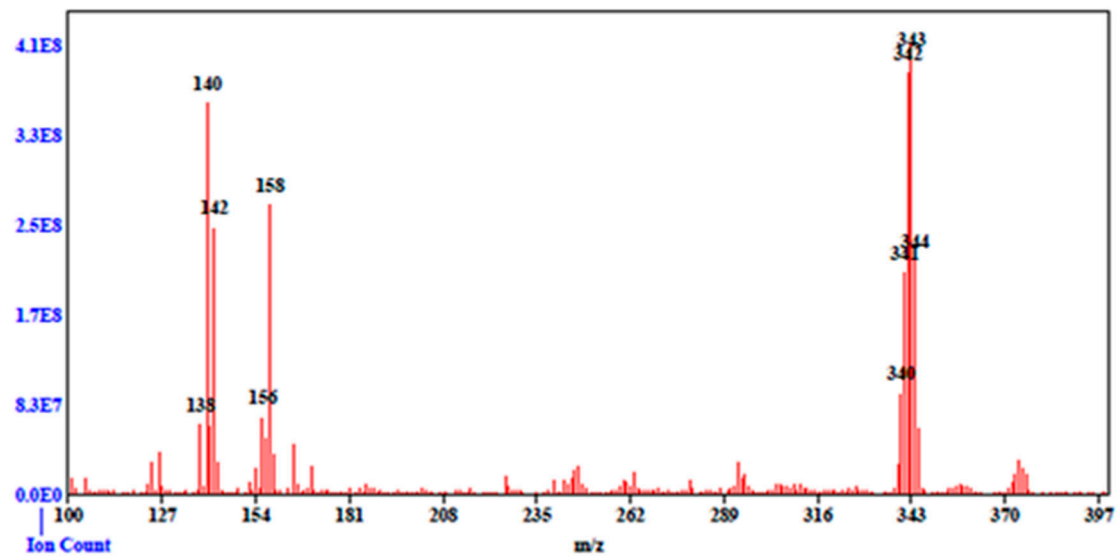

Figure S81. MS spectrum of reaction of **21** with TEMPO, and manganese catalyst.

Spectrum Name: X-DR-93\_fg  
Start Ion: 100  
End Ion: 400  
Source: APCI + 10.0μA 250C  
Capillary: 150V 200C Offset: 15V Span: 0V

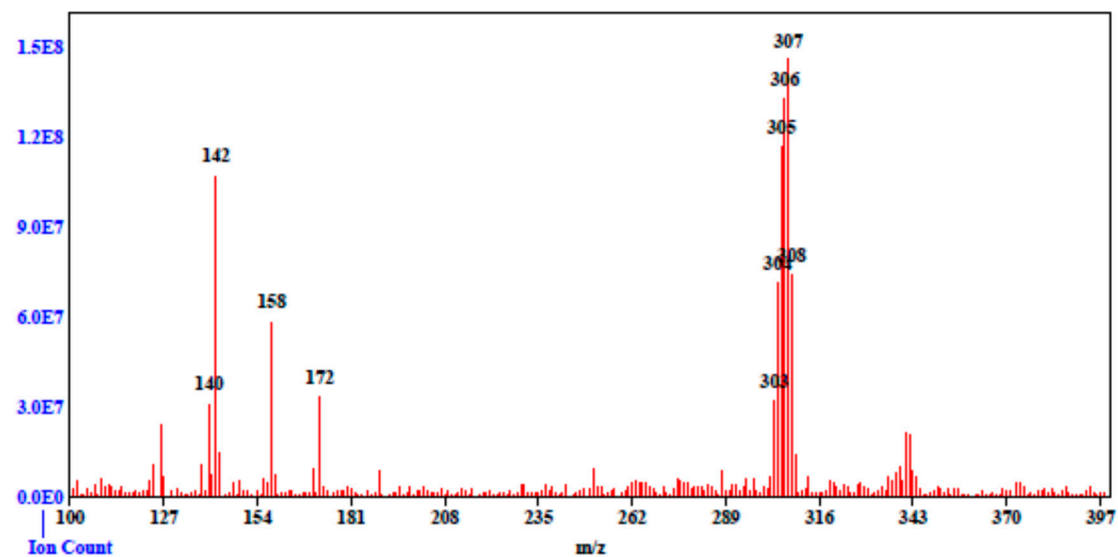

Figure S82. MS spectrum of reaction of **25** with TEMPO, and manganese catalyst.

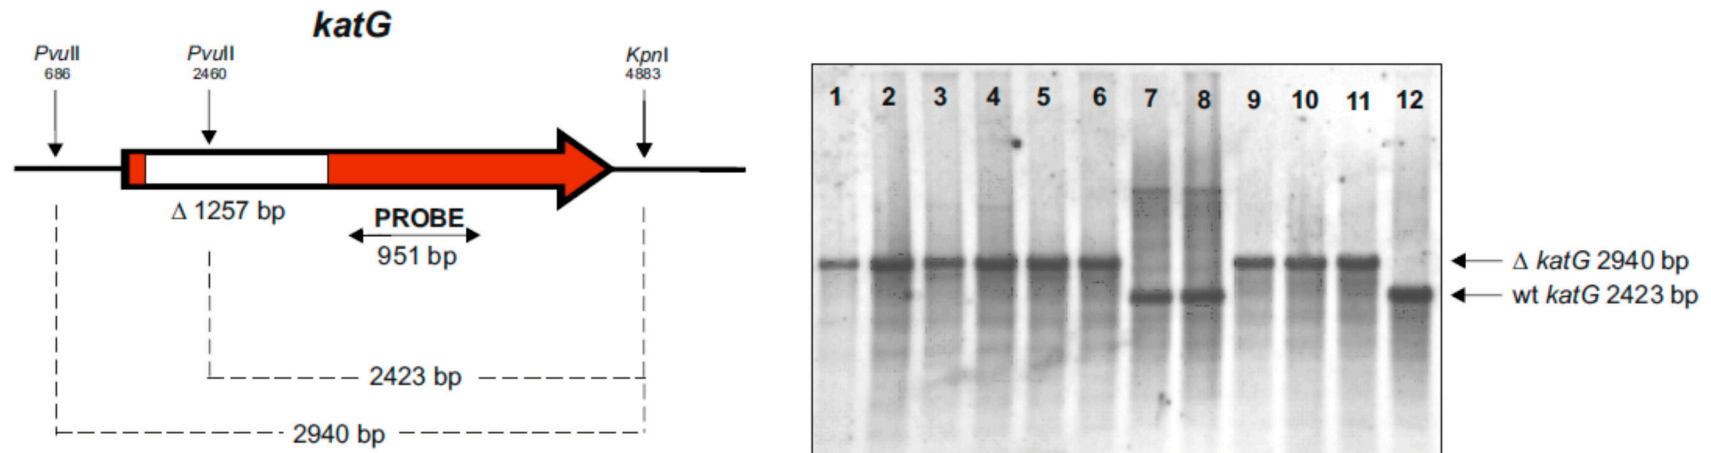

**Figure S83.** Confirmation of mutant construction by Southern blotting analysis. The *katG* was presented as red arrow. Restriction sites and internal deletion fragments (white rectangle) are indicated. DNA was digested with *PvuII* and *KpnI* restrictions enzymes. Lanes 1-6, 9-11 – *M. tuberculosis* H37Rv  $\Delta katG$  DCO (double cross-over mutants), lanes 7-8 – *M. tuberculosis* H37Rv SCO (single cross-over mutants), lane 12 – *M. tuberculosis* H37Rv wild-type strain.
